# Supplementary material for: Metabolomics and proteomics analyses reveal the role of the glycerophospholipid metabolism pathway in unexplained recurrent spontaneous abortion
Source: PeerJ journal article supplement (doi:10.7717/peerj.19317), 2025-04-30
Supplement: Experimental_raw_data.zip [file data.xlsx]

## Sheet: result
		Cq	Cq Mean	target gene				expression	average		p value
Control group	GAPDH	18.33	18.3867	25.76	7.37333	7.28333	0.09	0.939523	1.00097	0.0533324		PRL
Control group	GAPDH	18.39	18.3867	25.62	7.23333	7.28333	-0.05	1.03526
Control group	GAPDH	18.44	18.3867	25.63	7.24333	7.28333	-0.04	1.02811
Decidualization group	GAPDH	19.17	19.2367	23.46	4.22333	7.28333	-3.06	8.33973	7.23467	0.967035	0.00778108
Decidualization group	GAPDH	19.27	19.2367	23.81	4.57333	7.28333	-2.71	6.54322
Decidualization group	GAPDH	19.27	19.2367	23.75	4.51333	7.28333	-2.77	6.82108
Control group	GAPDH	18.33	18.3867	25.95	7.56333	7.33333	0.23	0.852635	1.00745	0.148497		IGFBP1
Control group	GAPDH	18.39	18.3867	25.69	7.30333	7.33333	-0.03	1.02101
Control group	GAPDH	18.44	18.3867	25.52	7.13333	7.33333	-0.2	1.1487
Decidualization group	GAPDH	19.17	19.2367	23.55	4.31333	7.33333	-3.02	8.11168	8.38214	0.772499	8.41668e-05
Decidualization group	GAPDH	19.27	19.2367	23.61	4.37333	7.33333	-2.96	7.78124
Decidualization group	GAPDH	19.27	19.2367	23.36	4.12333	7.33333	-3.21	9.25351

## Sheet: raw data
Hole	Channel	CT	TM	Target gene	Sample name
A01	FAM	25.76	81.5	PRL	Control group
A02	FAM	25.62	81.5	PRL	Control group
A03	FAM	25.63	81.5	PRL	Control group
A04	FAM	23.46	81.5	PRL	Decidualization group
A05	FAM	23.81	81.5	PRL	Decidualization group
A06	FAM	23.75	81.5	PRL	Decidualization group
A07	FAM	25.95	81.5	IGFBP1	Control group
A08	FAM	25.69	81.5	IGFBP1	Control group
A09	FAM	25.52	81.5	IGFBP1	Control group
A10	FAM	23.55	82.5	IGFBP1	Decidualization group
A11	FAM	23.61	82.5	IGFBP1	Decidualization group
A12	FAM	23.36	82.5	IGFBP1	Decidualization group
B01	FAM	18.33	85.5	GAPDH	Control group
B02	FAM	18.39	85.5	GAPDH	Control group
B03	FAM	18.44	85.5	GAPDH	Control group
B04	FAM	19.17	85.5	GAPDH	Decidualization group
B05	FAM	19.27	85.5	GAPDH	Decidualization group
B06	FAM	19.27	85.5	GAPDH	Decidualization group
