# Supplementary material for: Metabolomics and proteomics analyses reveal the role of the glycerophospholipid metabolism pathway in unexplained recurrent spontaneous abortion
Source: PeerJ journal article supplement (doi:10.7717/peerj.19317), 2025-04-30
Supplement: Experimental_raw_data.zip [file data.xlsx]

## Sheet: result
		Cq	Cq Mean	target gene				expression	average		p value
Control group	GAPDH	18.03	18.0733	30.84	12.7667	12.9967	-0.23	1.17283	1.00671	0.145599		PLD1
Control group	GAPDH	18.19	18.0733	31.22	13.1467	12.9967	0.15	0.90125
Control group	GAPDH	18	18.0733	31.15	13.0767	12.9967	0.08	0.946058
Decidualization group	GAPDH	18.79	18.8867	29.76	10.8733	12.9967	-2.12333	4.35699	4.1479	0.288026	7.25775e-05
Decidualization group	GAPDH	18.82	18.8867	29.95	11.0633	12.9967	-1.93333	3.81937
Decidualization group	GAPDH	19.05	18.8867	29.79	10.9033	12.9967	-2.09333	4.26733
Control group	GAPDH	18.03	18.0733	28.74	10.6667	10.43	0.236667	0.848704	1.01318	0.204806		CHPT1
Control group	GAPDH	18.19	18.0733	28.19	10.1167	10.43	-0.313333	1.24258
Control group	GAPDH	18	18.0733	28.58	10.5067	10.43	0.0766667	0.948246
Decidualization group	GAPDH	18.79	18.8867	26.16	7.27333	10.43	-3.15667	8.91767	9.01239	0.570375	2.16859e-05
Decidualization group	GAPDH	18.82	18.8867	26.23	7.34333	10.43	-3.08667	8.49531
Decidualization group	GAPDH	19.05	18.8867	26.05	7.16333	10.43	-3.26667	9.6242
Control group	GAPDH	18.03	18.0733	30.47	12.3967	12.39	0.00666667	0.99539	1.00026	0.0281121		PLA2G2A
Control group	GAPDH	18.19	18.0733	30.5	12.4267	12.39	0.0366667	0.974905
Control group	GAPDH	18	18.0733	30.42	12.3467	12.39	-0.0433333	1.03049
Decidualization group	GAPDH	18.79	18.8867	28.48	9.59333	12.39	-2.79667	6.94833	7.55958	0.778938	0.00462466
Decidualization group	GAPDH	18.82	18.8867	28.2	9.31333	12.39	-3.07667	8.43663
Decidualization group	GAPDH	19.05	18.8867	28.41	9.52333	12.39	-2.86667	7.29378

## Sheet: raw data
Hole	Channel	CT	TM	Target gene	Sample name
A01	FAM	30.84	81.5	PLD1	Control group
A02	FAM	31.22	81	PLD1	Control group
A03	FAM	31.15	81	PLD1	Control group
A04	FAM	29.76	81	PLD1	Decidualization group
A05	FAM	29.95	81	PLD1	Decidualization group
A06	FAM	29.79	81	PLD1	Decidualization group
A07	FAM	28.74	88	CHPT1	Control group
A08	FAM	28.19	88	CHPT1	Control group
A09	FAM	28.58	88	CHPT1	Control group
A10	FAM	26.16	86.5	CHPT1	Decidualization group
A11	FAM	26.23	86.5	CHPT1	Decidualization group
A12	FAM	26.05	86.5	CHPT1	Decidualization group
B01	FAM	30.47	80.5	PLA2G2A	Control group
B02	FAM	30.5	80.5	PLA2G2A	Control group
B03	FAM	30.42	80.5	PLA2G2A	Control group
B04	FAM	28.48	80.5	PLA2G2A	Decidualization group
B05	FAM	28.2	80.5	PLA2G2A	Decidualization group
B06	FAM	28.41	80.5	PLA2G2A	Decidualization group
B07	FAM	18.03	85.5	GAPDH	Control group
B08	FAM	18.19	85.5	GAPDH	Control group
B09	FAM	18	85.5	GAPDH	Control group
B10	FAM	18.79	85.5	GAPDH	Decidualization group
B11	FAM	18.82	85.5	GAPDH	Decidualization group
B12	FAM	19.05	85.5	GAPDH	Decidualization group

## Sheet: CCK8_data
0h	Blank	Control	Si-NC	Si-CHPT1
OD450	0.1634	0.2502	0.2504	0.2523
	0.1666	0.2565	0.256	0.2561
	0.1682	0.2553	0.2516	0.2587
	0.166067
Whitespace removal		0.0841333	0.0843333	0.0862333
		0.0904333	0.0899333	0.0900333
		0.0892333	0.0855333	0.0926333
24h	Blank	Control	Si-NC	Si-CHPT1
OD450	0.1677	0.5106	0.5238	0.3262
	0.1658	0.5163	0.5244	0.3245
	0.1659	0.5045	0.5272	0.324
	0.166467
Whitespace removal		0.344533	0.357733	0.160133
		0.350233	0.358333	0.158433
		0.338433	0.361133	0.157933
48h	Blank	Control	Si-NC	Si-CHPT1
OD450	0.1698	0.8123	0.8285	0.5289
	0.1624	0.8155	0.8294	0.5256
	0.1615	0.8119	0.8298	0.5214
	0.164567
Whitespace removal		0.646233	0.662433	0.362833
		0.649433	0.663333	0.359533
		0.645833	0.663733	0.355333
72h	Blank	Control	Si-NC	Si-CHPT1
OD450	0.1665	1.1419	1.1829	0.7227
	0.1636	1.1229	1.1331	0.7551
	0.1603	1.1293	1.1111	0.7121
	0.163467
Whitespace removal		0.975833	1.01683	0.556633
		0.956833	0.967033	0.589033
		0.963233	0.945033	0.546033
	OD450	Control			Si-NC			Si-CHPT1
	0h	0.0841333	0.0904333	0.0892333	0.0843333	0.0899333	0.0855333	0.0862333	0.0900333	0.0926333
	24h	0.344533	0.350233	0.338433	0.357733	0.358333	0.361133	0.160133	0.158433	0.157933
	48h	0.646233	0.649433	0.645833	0.662433	0.663333	0.663733	0.362833	0.359533	0.355333
	72h	0.975833	0.956833	0.963233	1.01683	0.967033	0.945033	0.556633	0.589033	0.546033
	P				0.660749			0.000189725

## Sheet: CCK8
	1	2	3	4	5	6	7	8	9	10	11	12
A	0.4398	0.4314	0.4197	0.427	0.4406	0.4129	0.4162	0.4063	0.435	0.4434	0.4278	0.4057
B	0.3969	0.1634	0.2502	0.2504	0.2523	0.4039	0.1677	0.5106	0.5238	0.3262	0.4425	0.403
C	0.4473	0.1666	0.2565	0.256	0.2561	0.3971	0.1658	0.5163	0.5244	0.3245	0.4441	0.4083
D	0.4199	0.1682	0.2553	0.2516	0.2587	0.4078	0.1659	0.5045	0.5272	0.324	0.4341	0.4216
E	0.4084	0.1698	0.8123	0.8285	0.5289	0.4476	0.1665	1.1419	1.1829	0.7227	0.436	0.4193
F	0.409	0.1624	0.8155	0.8294	0.5256	0.4124	0.1636	1.1229	1.1331	0.7551	0.4011	0.4165
G	0.4077	0.1615	0.8119	0.8298	0.5214	0.4216	0.1603	1.1293	1.1111	0.7121	0.4049	0.4096
H	0.4074	0.4393	0.4419	0.4465	0.4229	0.4265	0.3996	0.4096	0.4123	0.4335	0.409	0.4118
		Blank	Control	Si-NC	Si-CHPT1		Blank	Control	Si-NC	Si-CHPT1
		0H					24H
		48H					72H
