# Supplementary material for: Metabolomics and proteomics analyses reveal the role of the glycerophospholipid metabolism pathway in unexplained recurrent spontaneous abortion
Source: PeerJ journal article supplement (doi:10.7717/peerj.19317), 2025-04-30
Supplement: Experimental_raw_data.zip [file raw.xlsx]

## Sheet: Feuil1
si-NC	si-CHPT1
1.02	12.56
4.25	15.21
3.79	9.33
