# Supplementary material for: Metabolomics and proteomics analyses reveal the role of the glycerophospholipid metabolism pathway in unexplained recurrent spontaneous abortion
Source: PeerJ. 2025 Apr 30;13:e19317. doi: 10.7717/peerj.19317 (PMC12049100; doi:10.7717/peerj.19317)
Supplement: Supplemental Information 2 [file peerj-13-19317-s002.xlsx]

## Sheet: diffmeta_detail
Metabolite	m/z	Retention time	KEGG Compound ID	VIP	fc	pvalue	pathway	ProteinAccession(GeneName)	DEP_Accession(GeneName)
Abloxime	534.363	6.2192	-	2.25654	0.771612	0.00185002
SM(d20:1/PGF1alpha)	848.644	6.75317	-	2.24558	0.796142	0.00163649
Lidocaine	235.18	4.10652	C07073	3.49	1.77817	2.04762e-06	map00982	P21397(MAOA);Q9H2A2(ALDH8A1);P51648(ALDH3A2);P51649(ALDH5A1);P05108(CYP11A1);P09488(GSTM1);P47895(ALDH1A3);Q9Y2Q3(GSTK1);P30711(GSTT1);P09211(GSTP1);P20292(ALOX5AP);P08263(GSTA1);Q6UW02(CYP20A1);P00352(ALDH1A1);O94788(ALDH1A2);P30038(ALDH4A1);P24557(TBXAS1);O60760(HPGDS);P49189(ALDH9A1);P27338(MAOB);P30837(ALDH1B1);Q06278(AOX1);Q16678(CYP1B1);P28161(GSTM2);Q00796(SORD);O60341(KDM1A);Q02252(ALDH6A…	Q9H2A2(ALDH8A1);P51649(ALDH5A1);P05108(CYP11A1);P09488(GSTM1);P30711(GSTT1);P08263(GSTA1);P00352(ALDH1A1);O94788(ALDH1A2);P30038(ALDH4A1);O60760(HPGDS);P27338(MAOB);Q16678(CYP1B1);P46439(GSTM5);O14684(PTGES);P00325(ADH1B);O14880(MGST3);P21266(GSTM3);P05091(ALDH2);P11511(CYP19A1)
DG(18:1(12Z)-O(9S,10R)/0:0/i-13:0)	589.443	6.89143	-	2.11543	0.812215	0.00226731
PS(15:0/20:3(6,8,11)-OH(5))	829.527	6.3883	-	2.64441	0.756044	3.26093e-05
PE(18:2(9Z,12Z)/20:0)	804.618	6.76925	C00350	2.813	0.723694	0.000243077	map00564	O14495(PLPP3);Q7L5N7(LPCAT2);P28329(CHAT);Q9NRZ7(AGPAT3);Q8IY17(PNPLA6);Q9C0D9(SELENOI);O14939(PLD2);Q96N66(MBOAT7);P23141(CES1);P80404(ABAT);Q8IV08(PLD3);O14735(CDIPT);Q3MJ16(PLA2G4E);Q99447(PCYT2);Q5VWZ2(LYPLAL1);Q99943(AGPAT1);P43155(CRAT);O95674(CDS2);Q8N335(GPD1L);Q99828(CIB1);P61601(NCALD);Q9Y6K0(CEPT1);Q13393(PLD1);Q6P1A2(LPCAT3);P14555(PLA2G2A);P63098(PPP3R1);Q9Y259(CHKB);Q9UKY3(CES1P1);Q…	Q9C0D9(SELENOI);P80404(ABAT);Q13393(PLD1);P14555(PLA2G2A);Q9UKY3(CES1P1);P50416(CPT1A);Q8WWY8(LIPH);Q8WUD6(CHPT1)
PE(18:2(9Z,12Z)/20:0)	804.618	6.76925	C00350	2.813	0.723694	0.000243077	map01100	Q8NCL4(GALNT6);Q96I99(SUCLG2);Q99943(AGPAT1);P23526(AHCY);P30613(PKLR);Q96N66(MBOAT7);P00167(CYB5A);Q9NSC7(ST6GALNAC1);Q15274(QPRT);P08574(CYC1);Q13884(SNTB1);P20936(RASA1);Q8N0U8(VKORC1L1);Q13057(COASY);Q8TB45(DEPTOR);P00558(PGK1);Q9P2T1(GMPR2);Q00722(PLCB2);P22392(NME2);Q9NZL9(MAT2B);P04075(ALDOA);Q13724(MOGS);Q9NQ88(TIGAR);Q96LJ7(DHRS1);P13995(MTHFD2);Q6UB35(MTHFD1L);Q14247(CTTN);Q01970(PLCB3)…	Q8NCL4(GALNT6);P30613(PKLR);Q9NSC7(ST6GALNAC1);P20936(RASA1);Q6UB35(MTHFD1L);P52209(PGD);Q7L5L3(GDPD3);P30043(BLVRB);Q9UBM7(DHCR7);Q53FA7(TP53I3);P32322(PYCR1);Q86YB7(ECHDC2);P08842(STS);Q9C0D9(SELENOI);Q96DC8(ECHDC3);O00763(ACACB);O60476(MAN1A2);P51178(PLCD1);Q9H7F0(ATP13A3);Q9NZC3(GDE1);P46439(GSTM5);Q9H788(SH2D4A);Q9H477(RBKS);P16435(POR);Q9UHK6(AMACR);Q02153(GUCY1B1);Q7Z5P4(HSD17B13);Q13011(E…
PE(18:2(9Z,12Z)/20:0)	804.618	6.76925	C00350	2.813	0.723694	0.000243077	map04136	Q7Z3C6(ATG9A);O94817(ATG12);O75083(WDR1);Q99570(PIK3R4);Q14457(BECN1);O75385(ULK1);P62140(PPP1CB);O00443(PIK3C2A);Q9BZK7(TBL1XR1);Q9Y4P1(ATG4B);Q5MNZ9(WIPI1);Q9Y3F4(STRAP);Q5MNZ6(WDR45B);Q6UXN9(WDR82);P78527(PRKDC);P53041(PPP5C);Q9BV38(WDR18);Q9Y484(WDR45);Q04724(TLE1);Q08209(PPP3CA);Q04726(TLE3);O75143(ATG13);Q13315(ATM);Q96Q15(SMG1);P62714(PPP2CB);P36873(PPP1CC);Q8NEB9(PIK3C3);Q9H1Y0(ATG5);P783…	O94817(ATG12);P48454(PPP3CC);O00750(PIK3C2B)
PE(18:2(9Z,12Z)/20:0)	804.618	6.76925	C00350	2.813	0.723694	0.000243077	map04140	P51149(RAB7A);Q9Y2H1(STK38L);O94817(ATG12);Q9C0I1(MTMR12);P31749(AKT1);P08069(IGF1R);Q96DI7(SNRNP40);P10398(ARAF);Q9Y3L5(RAP2C);Q9GZM7(TINAGL1);Q68CZ2(TNS3);P10415(BCL2);Q9HBL0(TNS1);Q9Y3F4(STRAP);O14936(CASK);Q9H8W4(PLEKHF2);Q8TB45(DEPTOR);P51809(VAMP7);P56202(CTSW);P61020(RAB5B);Q9Y484(WDR45);O75716(STK16);Q15382(RHEB);P16234(PDGFRA);P37023(ACVRL1);Q05397(PTK2);Q96RR4(CAMKK2);Q9Y371(SH3GLB1);P7…	O94817(ATG12);Q9C0I1(MTMR12);Q9GZM7(TINAGL1);P37023(ACVRL1);Q9BW83(IFT27);O43293(DAPK3);Q8TD08(MAPK15);Q9Y572(RIPK3);O00750(PIK3C2B);P17948(FLT1);P15153(RAC2);O95721(SNAP29);Q96GC9(VMP1);P36897(TGFBR1);P35568(IRS1);Q05513(PRKCZ);P48454(PPP3CC);O14807(MRAS);Q07817(BCL2L1);Q13555(CAMK2G);O15347(HMGB3)
PE(18:2(9Z,12Z)/20:0)	804.618	6.76925	C00350	2.813	0.723694	0.000243077	map04723	Q9Y2H1(STK38L);P78368(CSNK1G2);P50151(GNG10);P50150(GNG4);Q00722(PLCB2);Q13523(PRPF4B);Q15147(PLCB4);P31749(AKT1);Q8TD08(MAPK15);Q99685(MGLL);O14561(NDUFAB1);P63096(GNAI1);Q8NCG7(DAGLB);Q01970(PLCB3);Q9NYV4(CDK12);Q13164(MAPK7);Q00534(CDK6);Q00537(CDK17);Q00536(CDK16);Q9GZL7(WDR12);P51812(RPS6KA3);O14727(APAF1);Q15269(PWP2);O14920(IKBKB);O75116(ROCK2);O15530(PDPK1);P63244(RACK1);Q9BV23(ABHD6);Q03…	Q8TD08(MAPK15);Q03113(GNA12);P51178(PLCD1);P03905(MT-ND4);Q02153(GUCY1B1);Q9NRA2(SLC17A5);Q05513(PRKCZ);P19174(PLCG1);Q15111(PLCL1);O15239(NDUFA1);Q86YQ8(CPNE8)
PE(18:2(9Z,12Z)/20:0)	804.618	6.76925	C00350	2.813	0.723694	0.000243077	map05130	P68366(TUBA4A);P68363(TUBA1B);Q9UQB8(BAIAP2);Q96FE7(PIK3IP1);Q5EG05(CARD16);P08575(PTPRC);Q13885(TUBB2A);P20936(RASA1);P23469(PTPRE);B2RTY4(MYO9A);Q9Y4C8(RBM19);P84085(ARF5);Q9HAU0(PLEKHA5);P18031(PTPN1);P04070(PROC);O43739(CYTH3);Q14247(CTTN);Q9BUF5(TUBB6);O43516(WIPF1);P09471(GNAO1);Q00537(CDK17);Q00536(CDK16);P53671(LIMK2);Q9BW83(IFT27);P11233(RALA);P63000(RAC1);P11234(RALB);Q9NP72(RAB18);Q147…	Q96FE7(PIK3IP1);P20936(RASA1);O43739(CYTH3);Q9BW83(IFT27);P08519(LPA);Q9H788(SH2D4A);Q5VV41(ARHGEF16);P19174(PLCG1);P01766(IGHV3-13);P00750(PLAT);P04626(ERBB2);A0A0B4J1V2(IGHV2-26);P63261(ACTG1);Q9Y2H5(PLEKHA6);P37023(ACVRL1);Q03113(GNA12);Q12923(PTPN13);Q9NPH3(IL1RAP);P15153(RAC2);Q16825(PTPN21);O15084(ANKRD28);P36897(TGFBR1);P68133(ACTA1);P11171(EPB41);Q3ZCM7(TUBB8);Q6EMK4(VASN);A0A0B4J1V6(IGHV…
PE(18:2(9Z,12Z)/20:0)	804.618	6.76925	C00350	2.813	0.723694	0.000243077	map05167	Q99828(CIB1);Q96M96(FGD4);P17535(JUND);P50151(GNG10);P50150(GNG4);P28068(HLA-DMB);Q9HAV0(GNB4);Q14651(PLS1);Q9Y3L5(RAP2C);Q96CV9(OPTN);Q92478(CLEC2B);Q95460(MR1);P55899(FCGRT);P19838(NFKB1);P16333(NCK1);P10415(BCL2);P04440(HLA-DPB1);P05161(ISG15);P01889(HLA-B);Q13546(RIPK1);P20936(RASA1);Q13164(MAPK7);Q9Y6K9(IKBKG);Q8TB45(DEPTOR);P49137(MAPKAPK2);P55083(MFAP4);O75460(ERN1);O75462(CRLF1);P55957(BI…	Q95460(MR1);P05161(ISG15);P20936(RASA1);P37023(ACVRL1);P04626(ERBB2);Q9Y572(RIPK3);P30511(HLA-F);Q99983(OMD);P42224(STAT1);O00750(PIK3C2B);Q8TDX7(NEK7);Q8TD08(MAPK15);P02671(FGA);P02675(FGB);Q9H788(SH2D4A);Q00978(IRF9);P15153(RAC2);P01920(HLA-DQB1);Q05513(PRKCZ);P24941(CDK2);P02776(PF4);P13598(ICAM2);O15084(ANKRD28);P14923(JUP);O15123(ANGPT2);P13762(HLA-DRB4);O60885(BRD4);Q96T88(UHRF1);P51178(PLC…
Arlacel A	433.292	6.47788	-	3.56483	0.573258	6.03319e-05
Dexamethasone palmitate	653.422	6.42517	-	4.14907	0.482672	0.000136899
Mikamycin B	887.364	3.71157	C11615	1.80634	1.43222	0.0219587
MG(20:3(6,8,11)-OH(5)/0:0/0:0)	419.276	6.44097	-	3.14041	0.734698	3.63822e-05
(2R,3R,5R)-3,5-Dihydroxy-2-[[(2R)-2-hydroxy-13-methyltetradecanoyl]amino]-15-methylhexadecane-1-sulfonic acid	572.436	6.20858	-	3.2885	1.6196	1.03693e-06
PG(18:0/PGF1alpha)	868.598	6.37767	-	3.01436	0.658997	4.54734e-05
PE(14:0/18:1(12Z)-O(9S,10R))	721.506	6.52532	-	2.70182	1.28752	7.17032e-05
Oxalacetic acid	130.998	1.1415	C00036	1.66647	1.30828	0.0298401	map00010	Q53FZ2(ACSM3);Q4G176(ACSF3);P04406(GAPDH);Q9H2A2(ALDH8A1);P10515(DLAT);Q96CM8(ACSF2);P14550(AKR1A1);P51648(ALDH3A2);P51649(ALDH5A1);Q9UNW1(MINPP1);P06733(ENO1);P19367(HK1);P47895(ALDH1A3);P18669(PGAM1);P00558(PGK1);P30038(ALDH4A1);P08559(PDHA1);P36957(DLST);Q8IZ83(ALDH16A1);P52790(HK3);P29401(TKT);P36871(PGM1);P00352(ALDH1A1);O94788(ALDH1A2);P09622(DLD);P60174(TPI1);P00390(GSR);P14618(PKM);P43353…	Q9H2A2(ALDH8A1);Q96CM8(ACSF2);P51649(ALDH5A1);P30038(ALDH4A1);P00352(ALDH1A1);O94788(ALDH1A2);P30613(PKLR);Q9NUB1(ACSS1);P17516(AKR1C4);P00325(ADH1B);P05091(ALDH2)
Oxalacetic acid	130.998	1.1415	C00036	1.66647	1.30828	0.0298401	map00020	Q96I99(SUCLG2);Q99643(SDHC);P21953(BCKDHB);P05165(PCCA);P21399(ACO1);O14521(SDHD);O00330(PDHX);P08559(PDHA1);P36957(DLST);P09622(DLD);O43837(IDH3B);P48735(IDH2);Q96HY7(DHTKD1);P10515(DLAT);P12694(BCKDHA);Q9NNW7(TXNRD2);P11177(PDHB);P51553(IDH3G);Q9P2R7(SUCLA2);P31040(SDHA);Q99798(ACO2);P29401(TKT);P00390(GSR);O75390(CS);P40925(MDH1);P40926(MDH2);P07954(FH);O00763(ACACB);P11182(DBT);Q02218(OGDH);P…	P48735(IDH2);O00763(ACACB)
Oxalacetic acid	130.998	1.1415	C00036	1.66647	1.30828	0.0298401	map00250	P21397(MAOA);Q02252(ALDH6A1);P05165(PCCA);Q14195(DPYSL3);P51648(ALDH3A2);Q6P996(PDXDC1);Q7L266(ASRGL1);P30038(ALDH4A1);P47895(ALDH1A3);P00966(ASS1);P31327(CPS1);P08243(ASNS);Q9Y3Q0(NAALAD2);P00352(ALDH1A1);O94788(ALDH1A2);Q06210(GFPT1);O00763(ACACB);Q04609(FOLH1);Q9Y646(CPQ);P43353(ALDH3B1);P49189(ALDH9A1);P27708(CAD);Q9H2A2(ALDH8A1);P04424(ASL);Q96RQ9(IL4I1);P30837(ALDH1B1);Q8IZ83(ALDH16A1);P305…	P30038(ALDH4A1);P08243(ASNS);P00352(ALDH1A1);O94788(ALDH1A2);O00763(ACACB);Q9H2A2(ALDH8A1);P27338(MAOB);P49448(GLUD2);O14531(DPYSL4);P51649(ALDH5A1);P05091(ALDH2);P80404(ABAT);P15104(GLUL)
Oxalacetic acid	130.998	1.1415	C00036	1.66647	1.30828	0.0298401	map00470	O94925(GLS);Q7Z3D6(DGLUCY);Q96GA7(SDSL);Q9GZT4(SRR)	Q96GA7(SDSL);Q9GZT4(SRR)
Oxalacetic acid	130.998	1.1415	C00036	1.66647	1.30828	0.0298401	map00620	Q8N490(PNKD);P05166(PCCB);P30613(PKLR);P09110(ACAA1);P12694(BCKDHA);P14618(PKM);P27708(CAD);Q9H2A2(ALDH8A1);Q6P1M0(SLC27A4);Q16775(HAGH);Q9NNW7(TXNRD2);Q00796(SORD);P24752(ACAT1);P00390(GSR);P05165(PCCA);P40925(MDH1);P40926(MDH2);O00154(ACOT7);P15121(AKR1B1);Q9H6R3(ACSS3);Q13363(CTBP1);Q99536(VAT1);Q53FZ2(ACSM3);Q16881(TXNRD1);P47895(ALDH1A3);Q86V21(AACS);P08559(PDHA1);Q16798(ME3);O00763(ACACB);P…	P30613(PKLR);Q9H2A2(ALDH8A1);Q16775(HAGH);O00763(ACACB);Q9NUB1(ACSS1);P14621(ACYP2);P05091(ALDH2);O43175(PHGDH);P17516(AKR1C4);P00325(ADH1B);P48163(ME1);Q96CM8(ACSF2);P51649(ALDH5A1);P30038(ALDH4A1);P00352(ALDH1A1);O94788(ALDH1A2)
Oxalacetic acid	130.998	1.1415	C00036	1.66647	1.30828	0.0298401	map00630	P05166(PCCB);Q4G176(ACSF3);P05165(PCCA);Q96CM8(ACSF2);P09110(ACAA1);P00390(GSR);P34897(SHMT2);P21399(ACO1);P22033(MMUT);P55084(HADHB);Q86V21(AACS);P31327(CPS1);Q9UBQ7(GRHPR);P09622(DLD);Q8NCN5(PDPR);P40925(MDH1);Q5T013(HYI);O00763(ACACB);P15104(GLUL);P27708(CAD);O43175(PHGDH);Q6P1M0(SLC27A4);Q9NUB1(ACSS1);Q9NNW7(TXNRD2);Q6PCB7(SLC27A1);P42765(ACAA2);Q99798(ACO2);P24752(ACAT1);Q96PE7(MCEE);P23378(…	Q96CM8(ACSF2);O00763(ACACB);P15104(GLUL);O43175(PHGDH);Q9NUB1(ACSS1);Q96PE7(MCEE);P23378(GLDC);P23434(GCSH);Q9H0R4(HDHD2)
Oxalacetic acid	130.998	1.1415	C00036	1.66647	1.30828	0.0298401	map01100	Q8NCL4(GALNT6);Q96I99(SUCLG2);Q99943(AGPAT1);P23526(AHCY);P30613(PKLR);Q96N66(MBOAT7);P00167(CYB5A);Q9NSC7(ST6GALNAC1);Q15274(QPRT);P08574(CYC1);Q13884(SNTB1);P20936(RASA1);Q8N0U8(VKORC1L1);Q13057(COASY);Q8TB45(DEPTOR);P00558(PGK1);Q9P2T1(GMPR2);Q00722(PLCB2);P22392(NME2);Q9NZL9(MAT2B);P04075(ALDOA);Q13724(MOGS);Q9NQ88(TIGAR);Q96LJ7(DHRS1);P13995(MTHFD2);Q6UB35(MTHFD1L);Q14247(CTTN);Q01970(PLCB3)…	Q8NCL4(GALNT6);P30613(PKLR);Q9NSC7(ST6GALNAC1);P20936(RASA1);Q6UB35(MTHFD1L);P52209(PGD);Q7L5L3(GDPD3);P30043(BLVRB);Q9UBM7(DHCR7);Q53FA7(TP53I3);P32322(PYCR1);Q86YB7(ECHDC2);P08842(STS);Q9C0D9(SELENOI);Q96DC8(ECHDC3);O00763(ACACB);O60476(MAN1A2);P51178(PLCD1);Q9H7F0(ATP13A3);Q9NZC3(GDE1);P46439(GSTM5);Q9H788(SH2D4A);Q9H477(RBKS);P16435(POR);Q9UHK6(AMACR);Q02153(GUCY1B1);Q7Z5P4(HSD17B13);Q13011(E…
Oxalacetic acid	130.998	1.1415	C00036	1.66647	1.30828	0.0298401	map01200	Q96I99(SUCLG2);P40939(HADHA);P05166(PCCB);Q9GZT4(SRR);P09110(ACAA1);P12694(BCKDHA);P48735(IDH2);P14618(PKM);P49247(RPIA);P27708(CAD);Q9H2A2(ALDH8A1);Q2TB90(HKDC1);Q9NTX5(ECHDC1);Q9NNW7(TXNRD2);Q00796(SORD);P51553(IDH3G);P52209(PGD);P24752(ACAT1);P00390(GSR);P05165(PCCA);P10768(ESD);Q9H008(LHPP);P40926(MDH2);Q8TD30(GPT2);P60891(PRPS1);Q9H6R3(ACSS3);Q13363(CTBP1);Q08426(EHHADH);P48728(AMT);Q14558(P…	Q9GZT4(SRR);P48735(IDH2);Q9H2A2(ALDH8A1);P52209(PGD);Q86YB7(ECHDC2);Q9H0R4(HDHD2);Q96GA7(SDSL);Q96DC8(ECHDC3);O00763(ACACB);Q13825(AUH);Q96PE7(MCEE);P49448(GLUD2);P30613(PKLR);P23434(GCSH);P05091(ALDH2);Q13011(ECH1);O43175(PHGDH);P00325(ADH1B);P48163(ME1);Q96CM8(ACSF2);P51649(ALDH5A1);P00352(ALDH1A1);O94788(ALDH1A2);Q9NUB1(ACSS1);P23378(GLDC)
Oxalacetic acid	130.998	1.1415	C00036	1.66647	1.30828	0.0298401	map01210	P50213(IDH3A);P17174(GOT1);Q99798(ACO2);P48735(IDH2);Q03154(ACY1);O75390(CS);O15382(BCAT2);P00505(GOT2);Q8TD30(GPT2);Q16773(KYAT1);P21399(ACO1);P54687(BCAT1);O43837(IDH3B);O75874(IDH1);Q96QU6(ACCS);P51553(IDH3G)	P48735(IDH2)
Oxalacetic acid	130.998	1.1415	C00036	1.66647	1.30828	0.0298401	map01230	P32929(CTH);Q96GA7(SDSL);P04406(GAPDH);P05165(PCCA);O15382(BCAT2);Q03154(ACY1);P34896(SHMT1);P34897(SHMT2);P21399(ACO1);P31153(MAT2A);P78540(ARG2);P06733(ENO1);P31327(CPS1);Q99707(MTR);P37837(TALDO1);P18669(PGAM1);P00966(ASS1);Q53H96(PYCR3);O75874(IDH1);P08243(ASNS);P05089(ARG1);P60174(TPI1);O00763(ACACB);P14618(PKM);P49247(RPIA);P15104(GLUL);P04075(ALDOA);Q9GZT4(SRR);P04424(ASL);P00558(PGK1);P54…	P32929(CTH);Q96GA7(SDSL);P08243(ASNS);O00763(ACACB);P15104(GLUL);Q9GZT4(SRR);P54886(ALDH18A1);O43175(PHGDH);P30613(PKLR);P48735(IDH2);P32322(PYCR1)
Oxalacetic acid	130.998	1.1415	C00036	1.66647	1.30828	0.0298401	map01240	P23381(WARS1);P05165(PCCA);O75911(DHRS3);Q15274(QPRT);P49327(FASN);Q96I15(SCLY);Q8N0U8(VKORC1L1);Q13057(COASY);Q9Y3D8(AK6);Q9Y5P6(GMPPB);P30038(ALDH4A1);Q6XQN6(NAPRT);Q02127(DHODH);P22392(NME2);Q9NZL9(MAT2B);P27708(CAD);Q9H2A2(ALDH8A1);P15559(NQO1);Q96LJ7(DHRS1);P13995(MTHFD2);Q6UB35(MTHFD1L);Q3SXM5(HSDL1);O15270(SPTLC2);Q9BZ23(PANK2);P56937(HSD17B7);P00390(GSR);Q9H008(LHPP);Q6YN16(HSDL2);Q6IA69(…	P30038(ALDH4A1);Q9H2A2(ALDH8A1);Q6UB35(MTHFD1L);Q8N4T8(CBR4);Q9NVS9(PNPO);Q92820(GGH);O00763(ACACB);Q9BPW9(DHRS9);O14531(DPYSL4);P28845(HSD11B1);P05091(ALDH2);Q7Z5P4(HSD17B13);P17516(AKR1C4);P36551(CPOX);P13716(ALAD);P38435(GGCX);P15428(HPGD);P80365(HSD11B2);Q5EBM0(CMPK2);Q03393(PTS);P51649(ALDH5A1);P00352(ALDH1A1);O94788(ALDH1A2);P05186(ALPL);Q96EY8(MMAB);P14061(HSD17B1);Q7Z4W1(DCXR)
Oxalacetic acid	130.998	1.1415	C00036	1.66647	1.30828	0.0298401	map04922	Q9Y2H1(STK38L);Q99828(CIB1);Q9Y478(PRKAB1);P31749(AKT1);Q00722(PLCB2);P30613(PKLR);Q14651(PLS1);P98177(FOXO4);Q15147(PLCB4);O14936(CASK);P05166(PCCB);O75460(ERN1);Q14643(ITPR1);P62140(PPP1CB);P14618(PKM);P27708(CAD);P05165(PCCA);P61601(NCALD);Q96RR4(CAMKK2);Q01970(PLCB3);Q14012(CAMK1);P63098(PPP3R1);Q01813(PFKP);P09471(GNAO1);Q15746(MYLK);P50416(CPT1A);P51812(RPS6KA3);P54619(PRKAG1);Q9NXA8(SIRT5)…	P30613(PKLR);P50416(CPT1A);Q03113(GNA12);O43293(DAPK3);O00763(ACACB);Q6UUV9(CRTC1);P51178(PLCD1);Q05513(PRKCZ);O60885(BRD4);Q86X55(CARM1);P48454(PPP3CC);Q9BQI0(AIF1L);P12829(MYL4);Q15111(PLCL1);P11169(SLC2A3);P11166(SLC2A1);Q02153(GUCY1B1);P19174(PLCG1);Q13555(CAMK2G)
Oxalacetic acid	130.998	1.1415	C00036	1.66647	1.30828	0.0298401	map04964	Q9HBR0(SLC38A10);P19634(SLC9A1);P53007(SLC25A1);P05023(ATP1A1);P05026(ATP1B1);P00915(CA1);O00168(FXYD1);Q9HD20(ATP13A1);P54709(ATP1B3);Q9Y2Q0(ATP8A1);O75185(ATP2C2);Q9Y6M7(SLC4A7);P98194(ATP2C1);Q9NTI2(ATP8A2);Q3KQZ1(SLC25A35);P23634(ATP2B4);Q9H7F0(ATP13A3);O94925(GLS);P02730(SLC4A1);P49448(GLUD2);P40925(MDH1);O43570(CA12);O75110(ATP9A);P00918(CA2);P04920(SLC4A2);P07451(CA3);Q9UBX3(SLC25A10);Q168…	P00915(CA1);O00168(FXYD1);O75185(ATP2C2);Q9H7F0(ATP13A3);P02730(SLC4A1);P49448(GLUD2);P07451(CA3);P55064(AQP5)
Oxalacetic acid	130.998	1.1415	C00036	1.66647	1.30828	0.0298401	map05230	P31749(AKT1);P08069(IGF1R);P30613(PKLR);Q9Y3L5(RAP2C);Q68CZ2(TNS3);P51805(PLXNA3);Q9HBL0(TNS1);P78527(PRKDC);Q16270(IGFBP7);P48735(IDH2);Q15382(RHEB);P16234(PDGFRA);Q9NQ88(TIGAR);P37023(ACVRL1);P43405(SYK);P08581(MET);O75880(SCO1);Q01974(ROR2);Q9NYV4(CDK12);P29401(TKT);Q13164(MAPK7);Q00534(CDK6);Q00537(CDK17);Q00536(CDK16);P60953(CDC42);P51812(RPS6KA3);Q9NXA8(SIRT5);P61225(RAP2B);P61224(RAP1B);P8…	P30613(PKLR);P48735(IDH2);P37023(ACVRL1);P36897(TGFBR1);O15427(SLC16A3);P52569(SLC7A2);P17948(FLT1);P29122(PCSK6);Q05513(PRKCZ);O14807(MRAS);O00750(PIK3C2B);P11169(SLC2A3);P11166(SLC2A1);P04626(ERBB2);Q8TD08(MAPK15);Q15120(PDK3);Q01650(SLC7A5)
PI(20:0/18:1(12Z)-2OH(9,10))	942.635	6.3249	-	3.058	0.740624	1.52632e-05
PI(16:0/18:1(9Z))	854.582	6.3407	C00626	2.75404	0.801472	1.5595e-05
PG(i-22:0/22:6(5Z,8E,10Z,13Z,15E,19Z)-2OH(7S, 17S))	928.619	6.29328	-	2.39445	0.697807	0.00287315
Fucoxanthin	676.462	6.34597	C08596	3.21747	0.607594	0.000340031
PG(18:1(12Z)-O(9S,10R)/i-15:0)	766.53	6.3565	-	2.67909	0.82089	1.35892e-05
2-Feruloyl-1-sinapoylgentiobiose	769.224	0.8044	-	2.23375	1.32215	0.000422669
Deferoxamine mesylate	578.39	6.21392	C06940	2.21877	0.782037	0.0017995
4alpha-Phorbol 12,13-didecanoate	690.499	6.26692	-	2.32603	1.28923	0.00193488
Dmap-ethyl-paf	590.425	6.39357	-	2.78296	0.815749	1.61124e-05
MG(PGD1/0:0/0:0)	446.311	6.23503	-	1.93708	0.824143	0.00306104
N-Acetyl-D-cysteine	146.027	0.656167	C06809	1.62939	1.22813	0.0262545
Tsugaric acid A 21-glucosyl ester	678.462	6.04392	-	3.33508	1.86476	0.000578304
Heptapropylene glycol	442.337	6.19273	-	2.10347	1.21484	0.00296908
PA(18:3(10,12,15)-OH(9)/13:0)	609.396	6.4357	-	3.25374	0.683931	3.28798e-05
Nonapropylene glycol	558.421	6.288	-	2.66675	1.3287	9.38942e-05
Tripropylene glycol butyl ether	271.188	6.19273	-	2.68562	0.732151	0.000520221
N(2)-phenylacetyl-L-glutaminate	309.109	3.28845	C05597	1.80602	1.20043	0.00510303
Arachidonic acid-biotin	632.458	6.2192	-	3.16462	1.51757	2.32923e-05
3-hydroxy-2-methyl-4-pyrone sulfate	204.981	3.29377	-	2.33925	1.68318	0.00245043
NONOXYNOL-9	634.452	6.383	-	2.74399	0.82083	1.4719e-05
PS(16:0/15:0)	785.5	6.39883	C02737	3.40357	0.618946	2.08307e-05	map00260	P21397(MAOA);P32929(CTH);Q96GA7(SDSL);Q9GZT4(SRR);Q14353(GAMT);P34896(SHMT1);P34897(SHMT2);P51648(ALDH3A2);P51649(ALDH5A1);Q16853(AOC3);Q99707(MTR);P47895(ALDH1A3);P18669(PGAM1);P30038(ALDH4A1);Q9UBQ7(GRHPR);Q9NUV7(SPTLC3);P09622(DLD);Q8NCN5(PDPR);P00352(ALDH1A1);O94788(ALDH1A2);P49189(ALDH9A1);P27338(MAOB);P30837(ALDH1B1);Q9NNW7(TXNRD2);P56545(CTBP2);O15270(SPTLC2);O60341(KDM1A);Q8NE62(CHDH);Q02…	P32929(CTH);Q96GA7(SDSL);Q9GZT4(SRR);P51649(ALDH5A1);P30038(ALDH4A1);P00352(ALDH1A1);O94788(ALDH1A2);P27338(MAOB);P23378(GLDC);Q9H2A2(ALDH8A1);O43175(PHGDH);P80404(ABAT);P19801(AOC1);P23434(GCSH);P05091(ALDH2)
PS(16:0/15:0)	785.5	6.39883	C02737	3.40357	0.618946	2.08307e-05	map00564	O14495(PLPP3);Q7L5N7(LPCAT2);P28329(CHAT);Q9NRZ7(AGPAT3);Q8IY17(PNPLA6);Q9C0D9(SELENOI);O14939(PLD2);Q96N66(MBOAT7);P23141(CES1);P80404(ABAT);Q8IV08(PLD3);O14735(CDIPT);Q3MJ16(PLA2G4E);Q99447(PCYT2);Q5VWZ2(LYPLAL1);Q99943(AGPAT1);P43155(CRAT);O95674(CDS2);Q8N335(GPD1L);Q99828(CIB1);P61601(NCALD);Q9Y6K0(CEPT1);Q13393(PLD1);Q6P1A2(LPCAT3);P14555(PLA2G2A);P63098(PPP3R1);Q9Y259(CHKB);Q9UKY3(CES1P1);Q…	Q9C0D9(SELENOI);P80404(ABAT);Q13393(PLD1);P14555(PLA2G2A);Q9UKY3(CES1P1);P50416(CPT1A);Q8WWY8(LIPH);Q8WUD6(CHPT1)
PS(16:0/15:0)	785.5	6.39883	C02737	3.40357	0.618946	2.08307e-05	map01100	Q8NCL4(GALNT6);Q96I99(SUCLG2);Q99943(AGPAT1);P23526(AHCY);P30613(PKLR);Q96N66(MBOAT7);P00167(CYB5A);Q9NSC7(ST6GALNAC1);Q15274(QPRT);P08574(CYC1);Q13884(SNTB1);P20936(RASA1);Q8N0U8(VKORC1L1);Q13057(COASY);Q8TB45(DEPTOR);P00558(PGK1);Q9P2T1(GMPR2);Q00722(PLCB2);P22392(NME2);Q9NZL9(MAT2B);P04075(ALDOA);Q13724(MOGS);Q9NQ88(TIGAR);Q96LJ7(DHRS1);P13995(MTHFD2);Q6UB35(MTHFD1L);Q14247(CTTN);Q01970(PLCB3)…	Q8NCL4(GALNT6);P30613(PKLR);Q9NSC7(ST6GALNAC1);P20936(RASA1);Q6UB35(MTHFD1L);P52209(PGD);Q7L5L3(GDPD3);P30043(BLVRB);Q9UBM7(DHCR7);Q53FA7(TP53I3);P32322(PYCR1);Q86YB7(ECHDC2);P08842(STS);Q9C0D9(SELENOI);Q96DC8(ECHDC3);O00763(ACACB);O60476(MAN1A2);P51178(PLCD1);Q9H7F0(ATP13A3);Q9NZC3(GDE1);P46439(GSTM5);Q9H788(SH2D4A);Q9H477(RBKS);P16435(POR);Q9UHK6(AMACR);Q02153(GUCY1B1);Q7Z5P4(HSD17B13);Q13011(E…
PS(16:0/15:0)	785.5	6.39883	C02737	3.40357	0.618946	2.08307e-05	map05140	P18433(PTPRA);P05160(F13B);P31749(AKT1);P28068(HLA-DMB);P49006(MARCKSL1);P0C0L5(C4B);P28067(HLA-DMA);Q95460(MR1);Q03591(CFHR1);Q13523(PRPF4B);P04440(HLA-DPB1);P10321(HLA-C);P01889(HLA-B);P20936(RASA1);P08476(INHBA);P23469(PTPRE);P23468(PTPRD);Q13219(PAPPA);P04839(CYBB);P16435(POR);P18031(PTPN1);P43378(PTPN9);P01768(IGHV3-30);O43586(PSTPIP1);Q96B97(SH3KBP1);Q8IUH4(ZDHHC13);P13612(ITGA4);P01766(IGH…	P05160(F13B);P0C0L5(C4B);Q95460(MR1);Q03591(CFHR1);P20936(RASA1);P16435(POR);P01766(IGHV3-13);P01780(IGHV3-7);P10643(C7);P04003(C4BPA);Q9Y572(RIPK3);P30511(HLA-F);P42224(STAT1);Q5HYK7(SH3D19);Q12923(PTPN13);P23083(IGHV1-2);Q8TD08(MAPK15);P08648(ITGA5);P17693(HLA-G);P10586(PTPRF);P01920(HLA-DQB1);Q16825(PTPN21);P26992(CNTFR);P13762(HLA-DRB4);Q9UGT4(SUSD2);P17301(ITGA2);Q4LDE5(SVEP1);A6NMZ7(COL6A6)…
PS(16:0/15:0)	785.5	6.39883	C02737	3.40357	0.618946	2.08307e-05	map05146	P51149(RAB7A);P51148(RAB5C);P04275(VWF);P08069(IGF1R);Q00722(PLCB2);P02461(COL3A1);Q14651(PLS1);P04278(SHBG);P01920(HLA-DQB1);Q95460(MR1);P55899(FCGRT);P04440(HLA-DPB1);P10321(HLA-C);P08572(COL4A2);Q15147(PLCB4);Q9Y2H1(STK38L);P08571(CD14);P55268(LAMB2);P02462(COL4A1);Q15149(PLEC);P78527(PRKDC);Q7RTP6(MICAL3);Q01638(IL1RL1);P07357(C8A);P20160(AZU1);P16435(POR);P24043(LAMA2);P08185(SERPINA6);P6309…	P02461(COL3A1);P01920(HLA-DQB1);Q95460(MR1);P08572(COL4A2);P08571(CD14);P55268(LAMB2);P02462(COL4A1);Q7RTP6(MICAL3);P07357(C8A);P20160(AZU1);P16435(POR);P02549(SPTA1);Q6W4X9(MUC6);P01766(IGHV3-13);P07358(C8B);P01780(IGHV3-7);P02776(PF4);P02775(PPBP);Q05707(COL14A1);Q9BW83(IFT27);P07093(SERPINE2);Q03113(GNA12);P30511(HLA-F);Q14315(FLNC);P50453(SERPINB9);P49863(GZMK);P08311(CTSG);P02748(C9);P08246(…
PS(16:0/15:0)	785.5	6.39883	C02737	3.40357	0.618946	2.08307e-05	map05322	P19474(TRIM21);P05160(F13B);P28068(HLA-DMB);Q14651(PLS1);P28067(HLA-DMA);Q95460(MR1);P14222(PRF1);P04440(HLA-DPB1);P10321(HLA-C);P01889(HLA-B);Q15149(PLEC);Q13219(PAPPA);Q7RTP6(MICAL3);Q6UXH9(PAMR1);P0C0S5(H2AZ1);P01768(IGHV3-30);Q6PKG0(LARP1);Q4G0J3(LARP7);P01766(IGHV3-13);P0DOY2(IGLC2);P08174(CD55);P01782(IGHV3-9);P01780(IGHV3-7);P06331(IGHV4-34);P0DP01(IGHV1-8);Q69YQ0(SPECC1L);P20160(AZU1);P10…	P05160(F13B);Q95460(MR1);Q7RTP6(MICAL3);Q6UXH9(PAMR1);P01766(IGHV3-13);P01780(IGHV3-7);P20160(AZU1);P10643(C7);Q5TEC6(H3-7);P02549(SPTA1);P04003(C4BPA);P30511(HLA-F);Q14315(FLNC);O95361(TRIM16);P49863(GZMK);P07357(C8A);P08311(CTSG);P07358(C8B);P08246(ELANE);P0C0L5(C4B);P23083(IGHV1-2);P13671(C6);P12544(GZMA);P01920(HLA-DQB1);P62805(H4C1);P00738(HP);P13762(HLA-DRB4);Q4LDE5(SVEP1);P17693(HLA-G);O95…
PE-NMe(24:0/18:2(9Z,12Z))	880.619	6.288	C01241	2.5796	1.36398	0.000849673
Dihydroxyeicosatrienoic acid	718.531	6.22447	-	2.48474	1.28505	0.00105532
Tyrosol 4-sulfate	199.007	5.89773	-	1.64855	1.2174	0.0113648
PA(16:0/20:5(5Z,8Z,11Z,14Z,17Z))	695.47	6.52532	C00416	1.7608	0.81579	0.0176901	map00561	Q9UKY3(CES1P1);Q7L5N7(LPCAT2);Q99943(AGPAT1);Q9H2A2(ALDH8A1);Q9NRZ7(AGPAT3);Q96N66(MBOAT7);P23141(CES1);P51648(ALDH3A2);P51649(ALDH5A1);Q8N0W4(NLGN4X);P47895(ALDH1A3);P15121(AKR1B1);P30038(ALDH4A1);P38571(LIPA);Q8IZ83(ALDH16A1);O14494(PLPP1);P00352(ALDH1A1);O94788(ALDH1A2);Q53H12(AGK);P43353(ALDH3B1);P49189(ALDH9A1);Q3LXA3(TKFC);O95870(ABHD16A);P17516(AKR1C4);P30837(ALDH1B1);P61601(NCALD);P14550(…	Q9UKY3(CES1P1);Q9H2A2(ALDH8A1);P51649(ALDH5A1);P30038(ALDH4A1);P00352(ALDH1A1);O94788(ALDH1A2);P17516(AKR1C4);O75907(DGAT1);P05091(ALDH2);Q8WWY8(LIPH)
PA(16:0/20:5(5Z,8Z,11Z,14Z,17Z))	695.47	6.52532	C00416	1.7608	0.81579	0.0176901	map00564	O14495(PLPP3);Q7L5N7(LPCAT2);P28329(CHAT);Q9NRZ7(AGPAT3);Q8IY17(PNPLA6);Q9C0D9(SELENOI);O14939(PLD2);Q96N66(MBOAT7);P23141(CES1);P80404(ABAT);Q8IV08(PLD3);O14735(CDIPT);Q3MJ16(PLA2G4E);Q99447(PCYT2);Q5VWZ2(LYPLAL1);Q99943(AGPAT1);P43155(CRAT);O95674(CDS2);Q8N335(GPD1L);Q99828(CIB1);P61601(NCALD);Q9Y6K0(CEPT1);Q13393(PLD1);Q6P1A2(LPCAT3);P14555(PLA2G2A);P63098(PPP3R1);Q9Y259(CHKB);Q9UKY3(CES1P1);Q…	Q9C0D9(SELENOI);P80404(ABAT);Q13393(PLD1);P14555(PLA2G2A);Q9UKY3(CES1P1);P50416(CPT1A);Q8WWY8(LIPH);Q8WUD6(CHPT1)
PA(16:0/20:5(5Z,8Z,11Z,14Z,17Z))	695.47	6.52532	C00416	1.7608	0.81579	0.0176901	map01100	Q8NCL4(GALNT6);Q96I99(SUCLG2);Q99943(AGPAT1);P23526(AHCY);P30613(PKLR);Q96N66(MBOAT7);P00167(CYB5A);Q9NSC7(ST6GALNAC1);Q15274(QPRT);P08574(CYC1);Q13884(SNTB1);P20936(RASA1);Q8N0U8(VKORC1L1);Q13057(COASY);Q8TB45(DEPTOR);P00558(PGK1);Q9P2T1(GMPR2);Q00722(PLCB2);P22392(NME2);Q9NZL9(MAT2B);P04075(ALDOA);Q13724(MOGS);Q9NQ88(TIGAR);Q96LJ7(DHRS1);P13995(MTHFD2);Q6UB35(MTHFD1L);Q14247(CTTN);Q01970(PLCB3)…	Q8NCL4(GALNT6);P30613(PKLR);Q9NSC7(ST6GALNAC1);P20936(RASA1);Q6UB35(MTHFD1L);P52209(PGD);Q7L5L3(GDPD3);P30043(BLVRB);Q9UBM7(DHCR7);Q53FA7(TP53I3);P32322(PYCR1);Q86YB7(ECHDC2);P08842(STS);Q9C0D9(SELENOI);Q96DC8(ECHDC3);O00763(ACACB);O60476(MAN1A2);P51178(PLCD1);Q9H7F0(ATP13A3);Q9NZC3(GDE1);P46439(GSTM5);Q9H788(SH2D4A);Q9H477(RBKS);P16435(POR);Q9UHK6(AMACR);Q02153(GUCY1B1);Q7Z5P4(HSD17B13);Q13011(E…
PA(16:0/20:5(5Z,8Z,11Z,14Z,17Z))	695.47	6.52532	C00416	1.7608	0.81579	0.0176901	map04024	Q9Y2H1(STK38L);P17535(JUND);P31749(AKT1);Q9NUT2(ABCB8);Q00722(PLCB2);Q9Y3L5(RAP2C);Q9Y4K4(MAP4K5);P19838(NFKB1);Q8N139(ABCA6);Q13523(PRPF4B);P46734(MAP2K3);Q15147(PLCB4);P09471(GNAO1);O14939(PLD2);O14936(CASK);Q8TB45(DEPTOR);O75185(ATP2C2);O75460(ERN1);Q03518(TAP1);Q03519(TAP2);P98194(ATP2C1);P98196(ATP11A);O14974(PPP1R12A);Q15382(RHEB);O15211(RGL2);O15438(ABCC3);Q15027(ACAP1);P08183(ABCB1);P4984…	O75185(ATP2C2);P08183(ABCB1);O60885(BRD4);Q8TDY4(ASAP3);Q03113(GNA12);Q05513(PRKCZ);O00168(FXYD1);P33527(ABCC1);Q8TD08(MAPK15);P17342(NPR3);P51178(PLCD1);Q9H7F0(ATP13A3);P15153(RAC2);Q5VV41(ARHGEF16);Q02153(GUCY1B1);O15084(ANKRD28);P22760(AADAC);Q13393(PLD1);O95342(ABCB11);A6NKQ9(CGB1);Q7LDG7(RASGRP2);P37023(ACVRL1);Q8WU79(SMAP2);Q9BXB1(LGR4);P19174(PLCG1);O14807(MRAS);O43293(DAPK3);Q9BQI0(AIF1L)…
PA(16:0/20:5(5Z,8Z,11Z,14Z,17Z))	695.47	6.52532	C00416	1.7608	0.81579	0.0176901	map04070	Q99828(CIB1);Q9C0I1(MTMR12);P31749(AKT1);Q00722(PLCB2);Q68CZ2(TNS3);O14735(CDIPT);Q9HBL0(TNS1);Q15147(PLCB4);P20936(RASA1);Q9H8W4(PLEKHF2);Q8TB45(DEPTOR);P78527(PRKDC);P62993(GRB2);A1X283(SH3PXD2B);P61601(NCALD);Q96B97(SH3KBP1);Q14247(CTTN);Q01970(PLCB3);Q9NTJ5(SACM1L);Q9UJU6(DBNL);P51812(RPS6KA3);Q8NCE2(MTMR14);O75116(ROCK2);Q96T51(RUFY1);O15530(PDPK1);O95861(BPNT1);Q7Z3T8(ZFYVE16);P37235(HPCAL1…	Q9C0I1(MTMR12);P20936(RASA1);P51178(PLCD1);Q9H788(SH2D4A);Q15283(RASA2);Q9BT40(INPP5K);P49441(INPP1);Q05513(PRKCZ);P19174(PLCG1);Q9BQI0(AIF1L);P12829(MYL4);Q15111(PLCL1);O00750(PIK3C2B);Q86YQ8(CPNE8)
PA(16:0/20:5(5Z,8Z,11Z,14Z,17Z))	695.47	6.52532	C00416	1.7608	0.81579	0.0176901	map04072	P18433(PTPRA);Q9Y2H5(PLEKHA6);P08069(IGF1R);Q00722(PLCB2);Q99828(CIB1);Q9Y3L5(RAP2C);Q96FE7(PIK3IP1);Q9NYV4(CDK12);P16333(NCK1);Q9NYL2(MAP3K20);P08575(PTPRC);Q15147(PLCB4);P20936(RASA1);O75886(STAM2);P31749(AKT1);P23469(PTPRE);Q8TD08(MAPK15);P84085(ARF5);Q6UXH9(PAMR1);Q9HAU0(PLEKHA5);P62993(GRB2);Q15382(RHEB);P18031(PTPN1);Q8NEB9(PIK3C3);Q15052(ARHGEF6);O00429(DNM1L);P16234(PDGFRA);P04070(PROC);P…	Q9Y2H5(PLEKHA6);Q96FE7(PIK3IP1);P20936(RASA1);Q8TD08(MAPK15);Q6UXH9(PAMR1);P37023(ACVRL1);O43739(CYTH3);P01780(IGHV3-7);P04626(ERBB2);O00750(PIK3C2B);Q12923(PTPN13);Q9Y572(RIPK3);P17948(FLT1);P51178(PLCD1);Q9H788(SH2D4A);P15153(RAC2);P00734(F2);Q02153(GUCY1B1);Q16825(PTPN21);Q13393(PLD1);P36897(TGFBR1);Q9NZH0(GPRC5B);Q05513(PRKCZ);P02775(PPBP);P19174(PLCG1);O14807(MRAS);Q15111(PLCL1);P01766(IGHV3…
PA(16:0/20:5(5Z,8Z,11Z,14Z,17Z))	695.47	6.52532	C00416	1.7608	0.81579	0.0176901	map04666	P31749(AKT1);P08575(PTPRC);P20936(RASA1);P23469(PTPRE);P23468(PTPRD);P84085(ARF5);P18031(PTPN1);O14639(ABLIM1);Q05397(PTK2);Q14247(CTTN);Q01970(PLCB3);Q5VYY1(ANKRD22);P09471(GNAO1);Q00537(CDK17);Q00536(CDK16);O95425(SVIL);O00499(BIN1);Q8N8S7(ENAH);P53671(LIMK2);P63000(RAC1);P35749(MYH11);P16885(PLCG2);P04049(RAF1);P29966(MARCKS);B2RTY4(MYO9A);Q9BX66(SORBS1);O00401(WASL);P51178(PLCD1);P18085(ARF4)…	P20936(RASA1);P51178(PLCD1);Q9H788(SH2D4A);Q5VV41(ARHGEF16);P19174(PLCG1);P04626(ERBB2);A0A0B4J1V2(IGHV2-26);A0A0B4J1V6(IGHV3-73);Q86YQ8(CPNE8);P63261(ACTG1);Q13643(FHL3);P37023(ACVRL1);Q8WU79(SMAP2);P15153(RAC2);Q9BT40(INPP5K);Q16825(PTPN21);P36897(TGFBR1);P68133(ACTA1);P01766(IGHV3-13);Q9Y572(RIPK3);Q8N1I0(DOCK4);P10586(PTPRF);O94929(ABLIM3);Q9Y281(CFL2);Q05513(PRKCZ);Q9H7D0(DOCK5);Q6H8Q1(ABLIM…
PA(16:0/20:5(5Z,8Z,11Z,14Z,17Z))	695.47	6.52532	C00416	1.7608	0.81579	0.0176901	map04912	Q9Y2H1(STK38L);P31749(AKT1);Q00722(PLCB2);Q9Y3L5(RAP2C);P61586(RHOA);Q92882(OSTF1);Q13523(PRPF4B);Q15147(PLCB4);P20936(RASA1);O14807(MRAS);O14936(CASK);P49137(MAPKAPK2);Q8TD08(MAPK15);P62993(GRB2);Q99683(MAP3K5);O60307(MAST3);P63096(GNAI1);P37023(ACVRL1);P43405(SYK);P43403(ZAP70);Q05397(PTK2);Q96RR4(CAMKK2);Q14247(CTTN);Q01970(PLCB3);Q14012(CAMK1);Q9NYV4(CDK12);Q13164(MAPK7);P09471(GNAO1);Q00537(…	P20936(RASA1);O14807(MRAS);Q8TD08(MAPK15);P37023(ACVRL1);Q9BQI0(AIF1L);P04004(VTN);Q03113(GNA12);P36897(TGFBR1);O43293(DAPK3);Q8TDX7(NEK7);P51178(PLCD1);P24941(CDK2);P22894(MMP8);P15153(RAC2);P51511(MMP15);P14780(MMP9);Q02153(GUCY1B1);Q13393(PLD1);A6NKQ9(CGB1);Q05513(PRKCZ);P02751(FN1);P19174(PLCG1);Q99986(VRK1);P12829(MYL4);Q15111(PLCL1);P29323(EPHB2);P01215(CGA);Q7LDG7(RASGRP2);P04626(ERBB2);Q1…
PA(16:0/20:5(5Z,8Z,11Z,14Z,17Z))	695.47	6.52532	C00416	1.7608	0.81579	0.0176901	map04975	O94911(ABCA8);O15118(NPC1);Q99943(AGPAT1);Q9NP58(ABCB6);P09110(ACAA1);P02647(APOA1);P04114(APOB);Q8N0W4(NLGN4X);P55084(HADHB);Q4G176(ACSF3);Q03518(TAP1);O95477(ABCA1);P29373(CRABP2);Q5K4L6(SLC27A3);Q8WTV0(SCARB1);O14975(SLC27A2);P08183(ABCB1);Q6P1M0(SLC27A4);Q9NUT2(ABCB8);Q9NUB1(ACSS1);P42765(ACAA2);P24752(ACAT1);Q6PCB7(SLC27A1);P14555(PLA2G2A);Q9UKY3(CES1P1);O75907(DGAT1);P09455(RBP1);P23141(CES…	O94911(ABCA8);O14975(SLC27A2);P08183(ABCB1);Q9NUB1(ACSS1);P14555(PLA2G2A);Q9UKY3(CES1P1);O75907(DGAT1);P09455(RBP1);P16671(CD36);O95342(ABCB11);P05413(FABP3);Q8WWY8(LIPH)
PA(16:0/20:5(5Z,8Z,11Z,14Z,17Z))	695.47	6.52532	C00416	1.7608	0.81579	0.0176901	map05200	Q02447(SP3);P50151(GNG10);P50150(GNG4);Q96FE7(PIK3IP1);P08572(COL4A2);P20936(RASA1);P31749(AKT1);O75610(LEFTY1);P23468(PTPRD);Q15269(PWP2);P16435(POR);P04070(PROC);Q05397(PTK2);P04278(SHBG);Q14247(CTTN);Q01970(PLCB3);Q8N392(ARHGAP18);Q01974(ROR2);Q00535(CDK5);Q00534(CDK6);Q00537(CDK17);P26232(CTNNA2);P15735(PHKG2);Q12931(TRAP1);P53671(LIMK2);P11233(RALA);Q99735(MGST2);P63000(RAC1);P11234(RALB);Q1…	Q96FE7(PIK3IP1);P08572(COL4A2);P20936(RASA1);P16435(POR);P49863(GZMK);Q9NQT8(KIF13B);Q8TDX7(NEK7);P51178(PLCD1);P11465(PSG2);P11169(SLC2A3);P46439(GSTM5);Q9H788(SH2D4A);Q5VV41(ARHGEF16);P01034(CST3);Q02153(GUCY1B1);A6NMZ7(COL6A6);Q13753(LAMC2);P51511(MMP15);O60760(HPGDS);Q9NPF0(CD320);P98160(HSPG2);O43240(KLK10);P12829(MYL4);P00750(PLAT);P04626(ERBB2);Q9UNX4(WDR3);Q8IUX8(EGFL6);Q14031(COL4A6);Q8W…
PA(16:0/20:5(5Z,8Z,11Z,14Z,17Z))	695.47	6.52532	C00416	1.7608	0.81579	0.0176901	map05212	Q9Y2H1(STK38L);P31749(AKT1);P10398(ARAF);Q9Y3L5(RAP2C);Q96CV9(OPTN);Q92882(OSTF1);P10415(BCL2);O14939(PLD2);Q9Y6K9(IKBKG);P78527(PRKDC);Q13017(ARHGAP5);Q15382(RHEB);O60307(MAST3);P37023(ACVRL1);P43405(SYK);Q14155(ARHGEF7);Q96B97(SH3KBP1);Q15052(ARHGEF6);P08581(MET);Q8IUH4(ZDHHC13);Q8N392(ARHGAP18);P27361(MAPK3);Q15811(ITSN1);Q9Y3M8(STARD13);P49918(CDKN1C);Q13164(MAPK7);Q00535(CDK5);Q00534(CDK6);Q…	P37023(ACVRL1);P36897(TGFBR1);P42224(STAT1);Q8TD08(MAPK15);P15153(RAC2);P24941(CDK2);O15084(ANKRD28);Q13393(PLD1);Q05513(PRKCZ);O14807(MRAS);Q7LDG7(RASGRP2);O00750(PIK3C2B);P29122(PCSK6);P04626(ERBB2);Q07817(BCL2L1);P61812(TGFB2);P84022(SMAD3)
PA(16:0/20:5(5Z,8Z,11Z,14Z,17Z))	695.47	6.52532	C00416	1.7608	0.81579	0.0176901	map05231	Q9Y2H1(STK38L);Q02447(SP3);O75751(SLC22A3);P31749(AKT1);Q00722(PLCB2);Q99828(CIB1);Q9Y3L5(RAP2C);Q92882(OSTF1);Q13523(PRPF4B);Q99447(PCYT2);Q5VWZ2(LYPLAL1);P20936(RASA1);Q8IWA5(SLC44A2);Q8TD08(MAPK15);P62993(GRB2);Q15382(RHEB);O15211(RGL2);P16234(PDGFRA);P61601(NCALD);P37023(ACVRL1);O00443(PIK3C2A);Q96B97(SH3KBP1);Q15052(ARHGEF6);Q14247(CTTN);Q01970(PLCB3);Q9NYV4(CDK12);Q13164(MAPK7);Q96FS4(SIPA1…	O75751(SLC22A3);P20936(RASA1);Q8TD08(MAPK15);P37023(ACVRL1);P51178(PLCD1);Q15111(PLCL1);O00750(PIK3C2B);P17948(FLT1);Q9H788(SH2D4A);P15153(RAC2);P11166(SLC2A1);Q13393(PLD1);P36897(TGFBR1);Q05513(PRKCZ);P19174(PLCG1);Q8WUD6(CHPT1);Q9NSA0(SLC22A11);O14807(MRAS);Q9C0D9(SELENOI);P11169(SLC2A3);Q7LDG7(RASGRP2);P04626(ERBB2);Q86YQ8(CPNE8);Q13542(EIF4EBP2);Q8WUF5(PPP1R13L)
DG(PGJ2/i-14:0/0:0)	660.489	6.19273	-	3.32438	1.57941	1.45391e-06
DG(20:4(6E,8Z,11Z,14Z)+=O(5)/i-13:0/0:0)	630.478	6.24032	-	3.40376	1.62707	6.18814e-07
PC(22:6(4Z,7Z,10Z,13Z,16Z,19Z)/P-18:0)	881.61	6.97102	C00157	1.92006	0.803987	0.0102907	map00564	O14495(PLPP3);Q7L5N7(LPCAT2);P28329(CHAT);Q9NRZ7(AGPAT3);Q8IY17(PNPLA6);Q9C0D9(SELENOI);O14939(PLD2);Q96N66(MBOAT7);P23141(CES1);P80404(ABAT);Q8IV08(PLD3);O14735(CDIPT);Q3MJ16(PLA2G4E);Q99447(PCYT2);Q5VWZ2(LYPLAL1);Q99943(AGPAT1);P43155(CRAT);O95674(CDS2);Q8N335(GPD1L);Q99828(CIB1);P61601(NCALD);Q9Y6K0(CEPT1);Q13393(PLD1);Q6P1A2(LPCAT3);P14555(PLA2G2A);P63098(PPP3R1);Q9Y259(CHKB);Q9UKY3(CES1P1);Q…	Q9C0D9(SELENOI);P80404(ABAT);Q13393(PLD1);P14555(PLA2G2A);Q9UKY3(CES1P1);P50416(CPT1A);Q8WWY8(LIPH);Q8WUD6(CHPT1)
PC(22:6(4Z,7Z,10Z,13Z,16Z,19Z)/P-18:0)	881.61	6.97102	C00157	1.92006	0.803987	0.0102907	map00590	P41222(PTGDS);P02760(AMBP);O75911(DHRS3);Q96SQ9(CYP2S1);P05108(CYP11A1);Q16850(CYP51A1);Q3MJ16(PLA2G4E);P15144(ANPEP);P15121(AKR1B1);Q02338(BDH1);Q8NBN7(RDH13);P09211(GSTP1);P22352(GPX3);P08263(GSTA1);O75828(CBR3);Q9BRX8(PRXL2A);Q8TC12(RDH11);P24557(TBXAS1);A6NGU5(GGT3P);Q8TED1(GPX8);Q9HBH5(RDH14);P36269(GGT5);P20292(ALOX5AP);Q16678(CYP1B1);P28161(GSTM2);Q15185(PTGES3);P09960(LTA4H);P16152(CBR1);…	P41222(PTGDS);P05108(CYP11A1);P08263(GSTA1);Q9BRX8(PRXL2A);Q16678(CYP1B1);P14555(PLA2G2A);P17516(AKR1C4);Q6Q4G3(LVRN);Q9NZ08(ERAP1);O14684(PTGES);P09488(GSTM1);O60760(HPGDS);P21266(GSTM3);P46439(GSTM5);P07360(C8G);P11511(CYP19A1)
PC(22:6(4Z,7Z,10Z,13Z,16Z,19Z)/P-18:0)	881.61	6.97102	C00157	1.92006	0.803987	0.0102907	map00591	P18054(ALOX12);Q16647(PTGIS);P09917(ALOX5);P24557(TBXAS1);Q16678(CYP1B1);Q6UW02(CYP20A1);Q96SQ9(CYP2S1);P05108(CYP11A1);Q16850(CYP51A1);Q3MJ16(PLA2G4E);Q00653(NFKB2);P14555(PLA2G2A);P11511(CYP19A1)	Q16678(CYP1B1);P05108(CYP11A1);P14555(PLA2G2A);P11511(CYP19A1)
PC(22:6(4Z,7Z,10Z,13Z,16Z,19Z)/P-18:0)	881.61	6.97102	C00157	1.92006	0.803987	0.0102907	map00592	P42765(ACAA2);O15254(ACOX3);Q15067(ACOX1);P22307(SCP2);O43169(CYB5B);P09110(ACAA1);P00167(CYB5A);Q9BWD1(ACAT2);Q3MJ16(PLA2G4E);Q00653(NFKB2);P55084(HADHB);P24752(ACAT1);P49748(ACADVL);P14555(PLA2G2A);P16219(ACADS);Q9Y5Q0(FADS3)	P14555(PLA2G2A)
PC(22:6(4Z,7Z,10Z,13Z,16Z,19Z)/P-18:0)	881.61	6.97102	C00157	1.92006	0.803987	0.0102907	map01100	Q8NCL4(GALNT6);Q96I99(SUCLG2);Q99943(AGPAT1);P23526(AHCY);P30613(PKLR);Q96N66(MBOAT7);P00167(CYB5A);Q9NSC7(ST6GALNAC1);Q15274(QPRT);P08574(CYC1);Q13884(SNTB1);P20936(RASA1);Q8N0U8(VKORC1L1);Q13057(COASY);Q8TB45(DEPTOR);P00558(PGK1);Q9P2T1(GMPR2);Q00722(PLCB2);P22392(NME2);Q9NZL9(MAT2B);P04075(ALDOA);Q13724(MOGS);Q9NQ88(TIGAR);Q96LJ7(DHRS1);P13995(MTHFD2);Q6UB35(MTHFD1L);Q14247(CTTN);Q01970(PLCB3)…	Q8NCL4(GALNT6);P30613(PKLR);Q9NSC7(ST6GALNAC1);P20936(RASA1);Q6UB35(MTHFD1L);P52209(PGD);Q7L5L3(GDPD3);P30043(BLVRB);Q9UBM7(DHCR7);Q53FA7(TP53I3);P32322(PYCR1);Q86YB7(ECHDC2);P08842(STS);Q9C0D9(SELENOI);Q96DC8(ECHDC3);O00763(ACACB);O60476(MAN1A2);P51178(PLCD1);Q9H7F0(ATP13A3);Q9NZC3(GDE1);P46439(GSTM5);Q9H788(SH2D4A);Q9H477(RBKS);P16435(POR);Q9UHK6(AMACR);Q02153(GUCY1B1);Q7Z5P4(HSD17B13);Q13011(E…
PC(22:6(4Z,7Z,10Z,13Z,16Z,19Z)/P-18:0)	881.61	6.97102	C00157	1.92006	0.803987	0.0102907	map04723	Q9Y2H1(STK38L);P78368(CSNK1G2);P50151(GNG10);P50150(GNG4);Q00722(PLCB2);Q13523(PRPF4B);Q15147(PLCB4);P31749(AKT1);Q8TD08(MAPK15);Q99685(MGLL);O14561(NDUFAB1);P63096(GNAI1);Q8NCG7(DAGLB);Q01970(PLCB3);Q9NYV4(CDK12);Q13164(MAPK7);Q00534(CDK6);Q00537(CDK17);Q00536(CDK16);Q9GZL7(WDR12);P51812(RPS6KA3);O14727(APAF1);Q15269(PWP2);O14920(IKBKB);O75116(ROCK2);O15530(PDPK1);P63244(RACK1);Q9BV23(ABHD6);Q03…	Q8TD08(MAPK15);Q03113(GNA12);P51178(PLCD1);P03905(MT-ND4);Q02153(GUCY1B1);Q9NRA2(SLC17A5);Q05513(PRKCZ);P19174(PLCG1);Q15111(PLCL1);O15239(NDUFA1);Q86YQ8(CPNE8)
PC(22:6(4Z,7Z,10Z,13Z,16Z,19Z)/P-18:0)	881.61	6.97102	C00157	1.92006	0.803987	0.0102907	map05231	Q9Y2H1(STK38L);Q02447(SP3);O75751(SLC22A3);P31749(AKT1);Q00722(PLCB2);Q99828(CIB1);Q9Y3L5(RAP2C);Q92882(OSTF1);Q13523(PRPF4B);Q99447(PCYT2);Q5VWZ2(LYPLAL1);P20936(RASA1);Q8IWA5(SLC44A2);Q8TD08(MAPK15);P62993(GRB2);Q15382(RHEB);O15211(RGL2);P16234(PDGFRA);P61601(NCALD);P37023(ACVRL1);O00443(PIK3C2A);Q96B97(SH3KBP1);Q15052(ARHGEF6);Q14247(CTTN);Q01970(PLCB3);Q9NYV4(CDK12);Q13164(MAPK7);Q96FS4(SIPA1…	O75751(SLC22A3);P20936(RASA1);Q8TD08(MAPK15);P37023(ACVRL1);P51178(PLCD1);Q15111(PLCL1);O00750(PIK3C2B);P17948(FLT1);Q9H788(SH2D4A);P15153(RAC2);P11166(SLC2A1);Q13393(PLD1);P36897(TGFBR1);Q05513(PRKCZ);P19174(PLCG1);Q8WUD6(CHPT1);Q9NSA0(SLC22A11);O14807(MRAS);Q9C0D9(SELENOI);P11169(SLC2A3);Q7LDG7(RASGRP2);P04626(ERBB2);Q86YQ8(CPNE8);Q13542(EIF4EBP2);Q8WUF5(PPP1R13L)
PE(20:0/18:1(9Z)-O(12,13))	810.556	6.35123	-	2.60775	0.822572	1.31605e-05
Octapropylene glycol	500.379	6.24032	-	2.64738	1.3362	0.000204895
Tert-butyl (2-{7-[(2S)-3-(4-cyanophenoxy)-2-hydroxypropyl]-9-oxa-3,7-diazabicyclo[3.3.1]non-3-yl}ethyl)carbamate	464.285	5.97435	-	1.68541	0.823425	0.0155406
PG(18:1(12Z)-O(9S,10R)/i-24:0)	892.67	6.73192	-	2.74459	0.718989	0.000489983
N-lactoyl-phenylalanine	238.107	5.60638	-	1.81519	1.23448	0.00591841
1-Carboxyethylisoleucine	204.123	5.43578	-	1.66685	1.20736	0.00780104
13-O-Tetradecanoylphorbol 12-acetate	634.436	6.04927	-	2.06376	1.22636	0.042865
5-Hydroxypentanoic acid	151.096	6.52005	C02804	2.46292	1.4179	9.07137e-05
Tolmetin	275.139	3.45468	C07149	2.33735	1.47	0.000579219
PG(22:6(4Z,7Z,10Z,13E,15E,19Z)-OH(17)/i-20:0)	884.593	6.29857	-	1.87057	0.832092	0.00419837
DG(2:0/0:0/PGF1alpha)	490.337	6.22447	-	2.15883	0.761463	0.00410744
MG(20:3(8Z,11Z,14Z)-2OH(5,6)/0:0/0:0)	435.271	6.16095	-	1.77072	0.693003	0.0456803
(7E,10E,13E,16E)-3-Hydroxydocosa-7,10,13,16-tetraenoylcarnitine	456.352	6.2509	-	3.36458	1.73984	4.88832e-06
Heteroxanthin	618.456	6.39883	C16353	3.23642	0.666727	0.000160267	map00232	Q16678(CYP1B1);P18440(NAT1);Q96SQ9(CYP2S1);Q06278(AOX1);Q16850(CYP51A1);P11511(CYP19A1)	Q16678(CYP1B1);P11511(CYP19A1)
Heteroxanthin	618.456	6.39883	C16353	3.23642	0.666727	0.000160267	map01100	Q8NCL4(GALNT6);Q96I99(SUCLG2);Q99943(AGPAT1);P23526(AHCY);P30613(PKLR);Q96N66(MBOAT7);P00167(CYB5A);Q9NSC7(ST6GALNAC1);Q15274(QPRT);P08574(CYC1);Q13884(SNTB1);P20936(RASA1);Q8N0U8(VKORC1L1);Q13057(COASY);Q8TB45(DEPTOR);P00558(PGK1);Q9P2T1(GMPR2);Q00722(PLCB2);P22392(NME2);Q9NZL9(MAT2B);P04075(ALDOA);Q13724(MOGS);Q9NQ88(TIGAR);Q96LJ7(DHRS1);P13995(MTHFD2);Q6UB35(MTHFD1L);Q14247(CTTN);Q01970(PLCB3)…	Q8NCL4(GALNT6);P30613(PKLR);Q9NSC7(ST6GALNAC1);P20936(RASA1);Q6UB35(MTHFD1L);P52209(PGD);Q7L5L3(GDPD3);P30043(BLVRB);Q9UBM7(DHCR7);Q53FA7(TP53I3);P32322(PYCR1);Q86YB7(ECHDC2);P08842(STS);Q9C0D9(SELENOI);Q96DC8(ECHDC3);O00763(ACACB);O60476(MAN1A2);P51178(PLCD1);Q9H7F0(ATP13A3);Q9NZC3(GDE1);P46439(GSTM5);Q9H788(SH2D4A);Q9H477(RBKS);P16435(POR);Q9UHK6(AMACR);Q02153(GUCY1B1);Q7Z5P4(HSD17B13);Q13011(E…
DG(i-14:0/0:0/20:5(7Z,9Z,11E,13E,17Z)-3OH(5,6,15))	676.483	6.21392	-	3.20586	1.65387	0.000208407
Arabinosylhypoxanthine	313.052	1.02345	-	1.90656	1.23866	0.00342171
Ternatin	720.509	6.20858	C16302	3.08874	1.5417	0.000466295
Trans-3-Feruloylcorosolic acid	666.442	6.198	-	2.00837	0.784991	0.00569641
Hallacridone	308.091	0.986017	-	1.88691	0.760376	0.0411163
Cdp-ethanolamine	445.053	0.606167	C00570	1.58129	0.82122	0.00739605	map00564	O14495(PLPP3);Q7L5N7(LPCAT2);P28329(CHAT);Q9NRZ7(AGPAT3);Q8IY17(PNPLA6);Q9C0D9(SELENOI);O14939(PLD2);Q96N66(MBOAT7);P23141(CES1);P80404(ABAT);Q8IV08(PLD3);O14735(CDIPT);Q3MJ16(PLA2G4E);Q99447(PCYT2);Q5VWZ2(LYPLAL1);Q99943(AGPAT1);P43155(CRAT);O95674(CDS2);Q8N335(GPD1L);Q99828(CIB1);P61601(NCALD);Q9Y6K0(CEPT1);Q13393(PLD1);Q6P1A2(LPCAT3);P14555(PLA2G2A);P63098(PPP3R1);Q9Y259(CHKB);Q9UKY3(CES1P1);Q…	Q9C0D9(SELENOI);P80404(ABAT);Q13393(PLD1);P14555(PLA2G2A);Q9UKY3(CES1P1);P50416(CPT1A);Q8WWY8(LIPH);Q8WUD6(CHPT1)
Cdp-ethanolamine	445.053	0.606167	C00570	1.58129	0.82122	0.00739605	map01100	Q8NCL4(GALNT6);Q96I99(SUCLG2);Q99943(AGPAT1);P23526(AHCY);P30613(PKLR);Q96N66(MBOAT7);P00167(CYB5A);Q9NSC7(ST6GALNAC1);Q15274(QPRT);P08574(CYC1);Q13884(SNTB1);P20936(RASA1);Q8N0U8(VKORC1L1);Q13057(COASY);Q8TB45(DEPTOR);P00558(PGK1);Q9P2T1(GMPR2);Q00722(PLCB2);P22392(NME2);Q9NZL9(MAT2B);P04075(ALDOA);Q13724(MOGS);Q9NQ88(TIGAR);Q96LJ7(DHRS1);P13995(MTHFD2);Q6UB35(MTHFD1L);Q14247(CTTN);Q01970(PLCB3)…	Q8NCL4(GALNT6);P30613(PKLR);Q9NSC7(ST6GALNAC1);P20936(RASA1);Q6UB35(MTHFD1L);P52209(PGD);Q7L5L3(GDPD3);P30043(BLVRB);Q9UBM7(DHCR7);Q53FA7(TP53I3);P32322(PYCR1);Q86YB7(ECHDC2);P08842(STS);Q9C0D9(SELENOI);Q96DC8(ECHDC3);O00763(ACACB);O60476(MAN1A2);P51178(PLCD1);Q9H7F0(ATP13A3);Q9NZC3(GDE1);P46439(GSTM5);Q9H788(SH2D4A);Q9H477(RBKS);P16435(POR);Q9UHK6(AMACR);Q02153(GUCY1B1);Q7Z5P4(HSD17B13);Q13011(E…
2,3-Dipalmitoyl-S-glycerylcysteine	672.525	6.53058	-	2.83287	1.28781	3.27035e-06
Chenodeoxyglycocholic acid	448.307	6.1216	C05466	1.97617	1.32993	0.00538257	map00120	Q8N4T8(CBR4);P15121(AKR1B1);O14975(SLC27A2);Q8IZV5(RDH10);Q96CM8(ACSF2);P09110(ACAA1);O75911(DHRS3);Q15800(MSMO1);O14734(ACOT8);Q16850(CYP51A1);P55084(HADHB);Q15738(NSDHL);Q15067(ACOX1);Q7Z5P4(HSD17B13);Q99714(HSD17B10);Q9NUI1(DECR2);O15254(ACOX3);Q5K4L6(SLC27A3);P24557(TBXAS1);Q7Z4W1(DCXR);Q8NBQ5(HSD17B11);Q4G176(ACSF3);Q6P1M0(SLC27A4);P17516(AKR1C4);Q06136(KDSR);P14550(AKR1A1);Q16698(DECR1);P42…	Q8N4T8(CBR4);O14975(SLC27A2);Q96CM8(ACSF2);Q7Z5P4(HSD17B13);Q7Z4W1(DCXR);P17516(AKR1C4);Q9UHK6(AMACR);P05108(CYP11A1);P14061(HSD17B1);P14060(HSD3B1);P15428(HPGD)
Chenodeoxyglycocholic acid	448.307	6.1216	C05466	1.97617	1.32993	0.00538257	map04976	Q9Y2H1(STK38L);O75751(SLC22A3);P31749(AKT1);Q9NUT2(ABCB8);Q92673(SORL1);P33527(ABCC1);O75185(ATP2C2);Q03518(TAP1);Q03519(TAP2);P98194(ATP2C1);P08183(ABCB1);Q6P1M0(SLC27A4);P50225(SULT1A1);P63096(GNAI1);P28702(RXRB);Q96RR4(CAMKK2);P09471(GNAO1);Q14344(GNA13);P51812(RPS6KA3);Q16647(PTGIS);O15438(ABCC3);O14920(IKBKB);P61221(ABCE1);O75110(ATP9A);P04920(SLC4A2);O75116(ROCK2);O15530(PDPK1);Q53FZ2(ACSM3…	O75751(SLC22A3);P33527(ABCC1);O75185(ATP2C2);P08183(ABCB1);P28702(RXRB);Q03113(GNA12);P55064(AQP5);Q92959(SLCO2A1);O00168(FXYD1);Q9H7F0(ATP13A3);Q02153(GUCY1B1);O94911(ABCA8);O14975(SLC27A2);O95342(ABCB11);Q05513(PRKCZ);P02730(SLC4A1);P07451(CA3);P00915(CA1);P11169(SLC2A3);P11166(SLC2A1);Q96BD0(SLCO4A1);Q96CM8(ACSF2);Q9NSA0(SLC22A11);P05108(CYP11A1);P22760(AADAC);P11511(CYP19A1)
Chenodeoxyglycocholic acid	448.307	6.1216	C05466	1.97617	1.32993	0.00538257	map04979	P05160(F13B);Q9NUT2(ABCB8);Q96FE7(PIK3IP1);P23142(FBLN1);Q92673(SORL1);P33527(ABCC1);Q03518(TAP1);Q03519(TAP2);Q99523(SORT1);Q14520(HABP2);Q8WTV0(SCARB1);P08183(ABCB1);Q8NHP6(MOSPD2);Q9BZF1(OSBPL8);Q9NPY3(CD93);Q9Y277(VDAC3);P17213(BPI);P08174(CD55);P26038(MSN);P18428(LBP);Q96HD1(CRELD1);P35610(SOAT1);P20160(AZU1);O15438(ABCC3);P61221(ABCE1);Q16647(PTGIS);P04003(C4BPA);P38571(LIPA);Q9H4L5(OSBPL3)…	P05160(F13B);Q96FE7(PIK3IP1);P23142(FBLN1);P33527(ABCC1);P08183(ABCB1);P17213(BPI);P18428(LBP);P20160(AZU1);P04003(C4BPA);A2A2Y4(FRMD3);P02671(FGA);P61916(NPC2);P02675(FGB);P02679(FGG);P00734(F2);P00738(HP);P15311(EZR);P22760(AADAC);O15123(ANGPT2);O94911(ABCA8);Q4LDE5(SVEP1);O95342(ABCB11);P11171(EPB41);Q9HCU0(CD248);Q9NPF0(CD320);P05108(CYP11A1);P00750(PLAT);P24158(PRTN3);P02649(APOE);Q8WWY8(LIP…
DG(18:1(12Z)-O(9S,10R)/0:0/8:0)	514.41	6.58342	-	1.82438	0.819571	0.0098084
2,5-dimethylbenzenesulfonic acid	185.028	5.13228	-	2.2793	1.40791	6.05688e-05
PA(18:3(9Z,12Z,15Z)/15:0)	621.433	6.62583	C00416	1.70534	0.826374	0.0289956	map00561	Q9UKY3(CES1P1);Q7L5N7(LPCAT2);Q99943(AGPAT1);Q9H2A2(ALDH8A1);Q9NRZ7(AGPAT3);Q96N66(MBOAT7);P23141(CES1);P51648(ALDH3A2);P51649(ALDH5A1);Q8N0W4(NLGN4X);P47895(ALDH1A3);P15121(AKR1B1);P30038(ALDH4A1);P38571(LIPA);Q8IZ83(ALDH16A1);O14494(PLPP1);P00352(ALDH1A1);O94788(ALDH1A2);Q53H12(AGK);P43353(ALDH3B1);P49189(ALDH9A1);Q3LXA3(TKFC);O95870(ABHD16A);P17516(AKR1C4);P30837(ALDH1B1);P61601(NCALD);P14550(…	Q9UKY3(CES1P1);Q9H2A2(ALDH8A1);P51649(ALDH5A1);P30038(ALDH4A1);P00352(ALDH1A1);O94788(ALDH1A2);P17516(AKR1C4);O75907(DGAT1);P05091(ALDH2);Q8WWY8(LIPH)
PA(18:3(9Z,12Z,15Z)/15:0)	621.433	6.62583	C00416	1.70534	0.826374	0.0289956	map00564	O14495(PLPP3);Q7L5N7(LPCAT2);P28329(CHAT);Q9NRZ7(AGPAT3);Q8IY17(PNPLA6);Q9C0D9(SELENOI);O14939(PLD2);Q96N66(MBOAT7);P23141(CES1);P80404(ABAT);Q8IV08(PLD3);O14735(CDIPT);Q3MJ16(PLA2G4E);Q99447(PCYT2);Q5VWZ2(LYPLAL1);Q99943(AGPAT1);P43155(CRAT);O95674(CDS2);Q8N335(GPD1L);Q99828(CIB1);P61601(NCALD);Q9Y6K0(CEPT1);Q13393(PLD1);Q6P1A2(LPCAT3);P14555(PLA2G2A);P63098(PPP3R1);Q9Y259(CHKB);Q9UKY3(CES1P1);Q…	Q9C0D9(SELENOI);P80404(ABAT);Q13393(PLD1);P14555(PLA2G2A);Q9UKY3(CES1P1);P50416(CPT1A);Q8WWY8(LIPH);Q8WUD6(CHPT1)
PA(18:3(9Z,12Z,15Z)/15:0)	621.433	6.62583	C00416	1.70534	0.826374	0.0289956	map01100	Q8NCL4(GALNT6);Q96I99(SUCLG2);Q99943(AGPAT1);P23526(AHCY);P30613(PKLR);Q96N66(MBOAT7);P00167(CYB5A);Q9NSC7(ST6GALNAC1);Q15274(QPRT);P08574(CYC1);Q13884(SNTB1);P20936(RASA1);Q8N0U8(VKORC1L1);Q13057(COASY);Q8TB45(DEPTOR);P00558(PGK1);Q9P2T1(GMPR2);Q00722(PLCB2);P22392(NME2);Q9NZL9(MAT2B);P04075(ALDOA);Q13724(MOGS);Q9NQ88(TIGAR);Q96LJ7(DHRS1);P13995(MTHFD2);Q6UB35(MTHFD1L);Q14247(CTTN);Q01970(PLCB3)…	Q8NCL4(GALNT6);P30613(PKLR);Q9NSC7(ST6GALNAC1);P20936(RASA1);Q6UB35(MTHFD1L);P52209(PGD);Q7L5L3(GDPD3);P30043(BLVRB);Q9UBM7(DHCR7);Q53FA7(TP53I3);P32322(PYCR1);Q86YB7(ECHDC2);P08842(STS);Q9C0D9(SELENOI);Q96DC8(ECHDC3);O00763(ACACB);O60476(MAN1A2);P51178(PLCD1);Q9H7F0(ATP13A3);Q9NZC3(GDE1);P46439(GSTM5);Q9H788(SH2D4A);Q9H477(RBKS);P16435(POR);Q9UHK6(AMACR);Q02153(GUCY1B1);Q7Z5P4(HSD17B13);Q13011(E…
PA(18:3(9Z,12Z,15Z)/15:0)	621.433	6.62583	C00416	1.70534	0.826374	0.0289956	map04024	Q9Y2H1(STK38L);P17535(JUND);P31749(AKT1);Q9NUT2(ABCB8);Q00722(PLCB2);Q9Y3L5(RAP2C);Q9Y4K4(MAP4K5);P19838(NFKB1);Q8N139(ABCA6);Q13523(PRPF4B);P46734(MAP2K3);Q15147(PLCB4);P09471(GNAO1);O14939(PLD2);O14936(CASK);Q8TB45(DEPTOR);O75185(ATP2C2);O75460(ERN1);Q03518(TAP1);Q03519(TAP2);P98194(ATP2C1);P98196(ATP11A);O14974(PPP1R12A);Q15382(RHEB);O15211(RGL2);O15438(ABCC3);Q15027(ACAP1);P08183(ABCB1);P4984…	O75185(ATP2C2);P08183(ABCB1);O60885(BRD4);Q8TDY4(ASAP3);Q03113(GNA12);Q05513(PRKCZ);O00168(FXYD1);P33527(ABCC1);Q8TD08(MAPK15);P17342(NPR3);P51178(PLCD1);Q9H7F0(ATP13A3);P15153(RAC2);Q5VV41(ARHGEF16);Q02153(GUCY1B1);O15084(ANKRD28);P22760(AADAC);Q13393(PLD1);O95342(ABCB11);A6NKQ9(CGB1);Q7LDG7(RASGRP2);P37023(ACVRL1);Q8WU79(SMAP2);Q9BXB1(LGR4);P19174(PLCG1);O14807(MRAS);O43293(DAPK3);Q9BQI0(AIF1L)…
PA(18:3(9Z,12Z,15Z)/15:0)	621.433	6.62583	C00416	1.70534	0.826374	0.0289956	map04070	Q99828(CIB1);Q9C0I1(MTMR12);P31749(AKT1);Q00722(PLCB2);Q68CZ2(TNS3);O14735(CDIPT);Q9HBL0(TNS1);Q15147(PLCB4);P20936(RASA1);Q9H8W4(PLEKHF2);Q8TB45(DEPTOR);P78527(PRKDC);P62993(GRB2);A1X283(SH3PXD2B);P61601(NCALD);Q96B97(SH3KBP1);Q14247(CTTN);Q01970(PLCB3);Q9NTJ5(SACM1L);Q9UJU6(DBNL);P51812(RPS6KA3);Q8NCE2(MTMR14);O75116(ROCK2);Q96T51(RUFY1);O15530(PDPK1);O95861(BPNT1);Q7Z3T8(ZFYVE16);P37235(HPCAL1…	Q9C0I1(MTMR12);P20936(RASA1);P51178(PLCD1);Q9H788(SH2D4A);Q15283(RASA2);Q9BT40(INPP5K);P49441(INPP1);Q05513(PRKCZ);P19174(PLCG1);Q9BQI0(AIF1L);P12829(MYL4);Q15111(PLCL1);O00750(PIK3C2B);Q86YQ8(CPNE8)
PA(18:3(9Z,12Z,15Z)/15:0)	621.433	6.62583	C00416	1.70534	0.826374	0.0289956	map04072	P18433(PTPRA);Q9Y2H5(PLEKHA6);P08069(IGF1R);Q00722(PLCB2);Q99828(CIB1);Q9Y3L5(RAP2C);Q96FE7(PIK3IP1);Q9NYV4(CDK12);P16333(NCK1);Q9NYL2(MAP3K20);P08575(PTPRC);Q15147(PLCB4);P20936(RASA1);O75886(STAM2);P31749(AKT1);P23469(PTPRE);Q8TD08(MAPK15);P84085(ARF5);Q6UXH9(PAMR1);Q9HAU0(PLEKHA5);P62993(GRB2);Q15382(RHEB);P18031(PTPN1);Q8NEB9(PIK3C3);Q15052(ARHGEF6);O00429(DNM1L);P16234(PDGFRA);P04070(PROC);P…	Q9Y2H5(PLEKHA6);Q96FE7(PIK3IP1);P20936(RASA1);Q8TD08(MAPK15);Q6UXH9(PAMR1);P37023(ACVRL1);O43739(CYTH3);P01780(IGHV3-7);P04626(ERBB2);O00750(PIK3C2B);Q12923(PTPN13);Q9Y572(RIPK3);P17948(FLT1);P51178(PLCD1);Q9H788(SH2D4A);P15153(RAC2);P00734(F2);Q02153(GUCY1B1);Q16825(PTPN21);Q13393(PLD1);P36897(TGFBR1);Q9NZH0(GPRC5B);Q05513(PRKCZ);P02775(PPBP);P19174(PLCG1);O14807(MRAS);Q15111(PLCL1);P01766(IGHV3…
PA(18:3(9Z,12Z,15Z)/15:0)	621.433	6.62583	C00416	1.70534	0.826374	0.0289956	map04666	P31749(AKT1);P08575(PTPRC);P20936(RASA1);P23469(PTPRE);P23468(PTPRD);P84085(ARF5);P18031(PTPN1);O14639(ABLIM1);Q05397(PTK2);Q14247(CTTN);Q01970(PLCB3);Q5VYY1(ANKRD22);P09471(GNAO1);Q00537(CDK17);Q00536(CDK16);O95425(SVIL);O00499(BIN1);Q8N8S7(ENAH);P53671(LIMK2);P63000(RAC1);P35749(MYH11);P16885(PLCG2);P04049(RAF1);P29966(MARCKS);B2RTY4(MYO9A);Q9BX66(SORBS1);O00401(WASL);P51178(PLCD1);P18085(ARF4)…	P20936(RASA1);P51178(PLCD1);Q9H788(SH2D4A);Q5VV41(ARHGEF16);P19174(PLCG1);P04626(ERBB2);A0A0B4J1V2(IGHV2-26);A0A0B4J1V6(IGHV3-73);Q86YQ8(CPNE8);P63261(ACTG1);Q13643(FHL3);P37023(ACVRL1);Q8WU79(SMAP2);P15153(RAC2);Q9BT40(INPP5K);Q16825(PTPN21);P36897(TGFBR1);P68133(ACTA1);P01766(IGHV3-13);Q9Y572(RIPK3);Q8N1I0(DOCK4);P10586(PTPRF);O94929(ABLIM3);Q9Y281(CFL2);Q05513(PRKCZ);Q9H7D0(DOCK5);Q6H8Q1(ABLIM…
PA(18:3(9Z,12Z,15Z)/15:0)	621.433	6.62583	C00416	1.70534	0.826374	0.0289956	map04912	Q9Y2H1(STK38L);P31749(AKT1);Q00722(PLCB2);Q9Y3L5(RAP2C);P61586(RHOA);Q92882(OSTF1);Q13523(PRPF4B);Q15147(PLCB4);P20936(RASA1);O14807(MRAS);O14936(CASK);P49137(MAPKAPK2);Q8TD08(MAPK15);P62993(GRB2);Q99683(MAP3K5);O60307(MAST3);P63096(GNAI1);P37023(ACVRL1);P43405(SYK);P43403(ZAP70);Q05397(PTK2);Q96RR4(CAMKK2);Q14247(CTTN);Q01970(PLCB3);Q14012(CAMK1);Q9NYV4(CDK12);Q13164(MAPK7);P09471(GNAO1);Q00537(…	P20936(RASA1);O14807(MRAS);Q8TD08(MAPK15);P37023(ACVRL1);Q9BQI0(AIF1L);P04004(VTN);Q03113(GNA12);P36897(TGFBR1);O43293(DAPK3);Q8TDX7(NEK7);P51178(PLCD1);P24941(CDK2);P22894(MMP8);P15153(RAC2);P51511(MMP15);P14780(MMP9);Q02153(GUCY1B1);Q13393(PLD1);A6NKQ9(CGB1);Q05513(PRKCZ);P02751(FN1);P19174(PLCG1);Q99986(VRK1);P12829(MYL4);Q15111(PLCL1);P29323(EPHB2);P01215(CGA);Q7LDG7(RASGRP2);P04626(ERBB2);Q1…
PA(18:3(9Z,12Z,15Z)/15:0)	621.433	6.62583	C00416	1.70534	0.826374	0.0289956	map04975	O94911(ABCA8);O15118(NPC1);Q99943(AGPAT1);Q9NP58(ABCB6);P09110(ACAA1);P02647(APOA1);P04114(APOB);Q8N0W4(NLGN4X);P55084(HADHB);Q4G176(ACSF3);Q03518(TAP1);O95477(ABCA1);P29373(CRABP2);Q5K4L6(SLC27A3);Q8WTV0(SCARB1);O14975(SLC27A2);P08183(ABCB1);Q6P1M0(SLC27A4);Q9NUT2(ABCB8);Q9NUB1(ACSS1);P42765(ACAA2);P24752(ACAT1);Q6PCB7(SLC27A1);P14555(PLA2G2A);Q9UKY3(CES1P1);O75907(DGAT1);P09455(RBP1);P23141(CES…	O94911(ABCA8);O14975(SLC27A2);P08183(ABCB1);Q9NUB1(ACSS1);P14555(PLA2G2A);Q9UKY3(CES1P1);O75907(DGAT1);P09455(RBP1);P16671(CD36);O95342(ABCB11);P05413(FABP3);Q8WWY8(LIPH)
PA(18:3(9Z,12Z,15Z)/15:0)	621.433	6.62583	C00416	1.70534	0.826374	0.0289956	map05200	Q02447(SP3);P50151(GNG10);P50150(GNG4);Q96FE7(PIK3IP1);P08572(COL4A2);P20936(RASA1);P31749(AKT1);O75610(LEFTY1);P23468(PTPRD);Q15269(PWP2);P16435(POR);P04070(PROC);Q05397(PTK2);P04278(SHBG);Q14247(CTTN);Q01970(PLCB3);Q8N392(ARHGAP18);Q01974(ROR2);Q00535(CDK5);Q00534(CDK6);Q00537(CDK17);P26232(CTNNA2);P15735(PHKG2);Q12931(TRAP1);P53671(LIMK2);P11233(RALA);Q99735(MGST2);P63000(RAC1);P11234(RALB);Q1…	Q96FE7(PIK3IP1);P08572(COL4A2);P20936(RASA1);P16435(POR);P49863(GZMK);Q9NQT8(KIF13B);Q8TDX7(NEK7);P51178(PLCD1);P11465(PSG2);P11169(SLC2A3);P46439(GSTM5);Q9H788(SH2D4A);Q5VV41(ARHGEF16);P01034(CST3);Q02153(GUCY1B1);A6NMZ7(COL6A6);Q13753(LAMC2);P51511(MMP15);O60760(HPGDS);Q9NPF0(CD320);P98160(HSPG2);O43240(KLK10);P12829(MYL4);P00750(PLAT);P04626(ERBB2);Q9UNX4(WDR3);Q8IUX8(EGFL6);Q14031(COL4A6);Q8W…
PA(18:3(9Z,12Z,15Z)/15:0)	621.433	6.62583	C00416	1.70534	0.826374	0.0289956	map05212	Q9Y2H1(STK38L);P31749(AKT1);P10398(ARAF);Q9Y3L5(RAP2C);Q96CV9(OPTN);Q92882(OSTF1);P10415(BCL2);O14939(PLD2);Q9Y6K9(IKBKG);P78527(PRKDC);Q13017(ARHGAP5);Q15382(RHEB);O60307(MAST3);P37023(ACVRL1);P43405(SYK);Q14155(ARHGEF7);Q96B97(SH3KBP1);Q15052(ARHGEF6);P08581(MET);Q8IUH4(ZDHHC13);Q8N392(ARHGAP18);P27361(MAPK3);Q15811(ITSN1);Q9Y3M8(STARD13);P49918(CDKN1C);Q13164(MAPK7);Q00535(CDK5);Q00534(CDK6);Q…	P37023(ACVRL1);P36897(TGFBR1);P42224(STAT1);Q8TD08(MAPK15);P15153(RAC2);P24941(CDK2);O15084(ANKRD28);Q13393(PLD1);Q05513(PRKCZ);O14807(MRAS);Q7LDG7(RASGRP2);O00750(PIK3C2B);P29122(PCSK6);P04626(ERBB2);Q07817(BCL2L1);P61812(TGFB2);P84022(SMAD3)
PA(18:3(9Z,12Z,15Z)/15:0)	621.433	6.62583	C00416	1.70534	0.826374	0.0289956	map05231	Q9Y2H1(STK38L);Q02447(SP3);O75751(SLC22A3);P31749(AKT1);Q00722(PLCB2);Q99828(CIB1);Q9Y3L5(RAP2C);Q92882(OSTF1);Q13523(PRPF4B);Q99447(PCYT2);Q5VWZ2(LYPLAL1);P20936(RASA1);Q8IWA5(SLC44A2);Q8TD08(MAPK15);P62993(GRB2);Q15382(RHEB);O15211(RGL2);P16234(PDGFRA);P61601(NCALD);P37023(ACVRL1);O00443(PIK3C2A);Q96B97(SH3KBP1);Q15052(ARHGEF6);Q14247(CTTN);Q01970(PLCB3);Q9NYV4(CDK12);Q13164(MAPK7);Q96FS4(SIPA1…	O75751(SLC22A3);P20936(RASA1);Q8TD08(MAPK15);P37023(ACVRL1);P51178(PLCD1);Q15111(PLCL1);O00750(PIK3C2B);P17948(FLT1);Q9H788(SH2D4A);P15153(RAC2);P11166(SLC2A1);Q13393(PLD1);P36897(TGFBR1);Q05513(PRKCZ);P19174(PLCG1);Q8WUD6(CHPT1);Q9NSA0(SLC22A11);O14807(MRAS);Q9C0D9(SELENOI);P11169(SLC2A3);Q7LDG7(RASGRP2);P04626(ERBB2);Q86YQ8(CPNE8);Q13542(EIF4EBP2);Q8WUF5(PPP1R13L)
Triethylene glycol	151.096	6.58342	-	2.79496	1.4628	1.4235e-05
CL(20:4(5Z,8Z,11Z,14Z)/18:0/22:5(7Z,10Z,13Z,16Z,19Z)/18:0)	788.517	6.25617	C05980	2.00247	0.829239	0.00171149	map00564	O14495(PLPP3);Q7L5N7(LPCAT2);P28329(CHAT);Q9NRZ7(AGPAT3);Q8IY17(PNPLA6);Q9C0D9(SELENOI);O14939(PLD2);Q96N66(MBOAT7);P23141(CES1);P80404(ABAT);Q8IV08(PLD3);O14735(CDIPT);Q3MJ16(PLA2G4E);Q99447(PCYT2);Q5VWZ2(LYPLAL1);Q99943(AGPAT1);P43155(CRAT);O95674(CDS2);Q8N335(GPD1L);Q99828(CIB1);P61601(NCALD);Q9Y6K0(CEPT1);Q13393(PLD1);Q6P1A2(LPCAT3);P14555(PLA2G2A);P63098(PPP3R1);Q9Y259(CHKB);Q9UKY3(CES1P1);Q…	Q9C0D9(SELENOI);P80404(ABAT);Q13393(PLD1);P14555(PLA2G2A);Q9UKY3(CES1P1);P50416(CPT1A);Q8WWY8(LIPH);Q8WUD6(CHPT1)
CL(20:4(5Z,8Z,11Z,14Z)/18:0/22:5(7Z,10Z,13Z,16Z,19Z)/18:0)	788.517	6.25617	C05980	2.00247	0.829239	0.00171149	map01100	Q8NCL4(GALNT6);Q96I99(SUCLG2);Q99943(AGPAT1);P23526(AHCY);P30613(PKLR);Q96N66(MBOAT7);P00167(CYB5A);Q9NSC7(ST6GALNAC1);Q15274(QPRT);P08574(CYC1);Q13884(SNTB1);P20936(RASA1);Q8N0U8(VKORC1L1);Q13057(COASY);Q8TB45(DEPTOR);P00558(PGK1);Q9P2T1(GMPR2);Q00722(PLCB2);P22392(NME2);Q9NZL9(MAT2B);P04075(ALDOA);Q13724(MOGS);Q9NQ88(TIGAR);Q96LJ7(DHRS1);P13995(MTHFD2);Q6UB35(MTHFD1L);Q14247(CTTN);Q01970(PLCB3)…	Q8NCL4(GALNT6);P30613(PKLR);Q9NSC7(ST6GALNAC1);P20936(RASA1);Q6UB35(MTHFD1L);P52209(PGD);Q7L5L3(GDPD3);P30043(BLVRB);Q9UBM7(DHCR7);Q53FA7(TP53I3);P32322(PYCR1);Q86YB7(ECHDC2);P08842(STS);Q9C0D9(SELENOI);Q96DC8(ECHDC3);O00763(ACACB);O60476(MAN1A2);P51178(PLCD1);Q9H7F0(ATP13A3);Q9NZC3(GDE1);P46439(GSTM5);Q9H788(SH2D4A);Q9H477(RBKS);P16435(POR);Q9UHK6(AMACR);Q02153(GUCY1B1);Q7Z5P4(HSD17B13);Q13011(E…
D-gamma-Glutamyl-D-glutamic acid	275.088	0.905767	-	1.82345	1.22259	0.014683
3-Amino-1-(3-(cyclohexylmethoxy)phenyl)propan-1-ol	544.406	6.23503	-	3.33123	1.64032	2.16157e-06
Amydricaine	574.43	6.40937	-	3.15456	0.696169	9.96498e-05
Enallylpropymal	269.114	3.48025	-	1.42133	1.20779	0.00911142
4-hydroxybenzaldehyde	105.033	4.25022	C00633	1.59941	1.37184	0.00946544	map01100	Q8NCL4(GALNT6);Q96I99(SUCLG2);Q99943(AGPAT1);P23526(AHCY);P30613(PKLR);Q96N66(MBOAT7);P00167(CYB5A);Q9NSC7(ST6GALNAC1);Q15274(QPRT);P08574(CYC1);Q13884(SNTB1);P20936(RASA1);Q8N0U8(VKORC1L1);Q13057(COASY);Q8TB45(DEPTOR);P00558(PGK1);Q9P2T1(GMPR2);Q00722(PLCB2);P22392(NME2);Q9NZL9(MAT2B);P04075(ALDOA);Q13724(MOGS);Q9NQ88(TIGAR);Q96LJ7(DHRS1);P13995(MTHFD2);Q6UB35(MTHFD1L);Q14247(CTTN);Q01970(PLCB3)…	Q8NCL4(GALNT6);P30613(PKLR);Q9NSC7(ST6GALNAC1);P20936(RASA1);Q6UB35(MTHFD1L);P52209(PGD);Q7L5L3(GDPD3);P30043(BLVRB);Q9UBM7(DHCR7);Q53FA7(TP53I3);P32322(PYCR1);Q86YB7(ECHDC2);P08842(STS);Q9C0D9(SELENOI);Q96DC8(ECHDC3);O00763(ACACB);O60476(MAN1A2);P51178(PLCD1);Q9H7F0(ATP13A3);Q9NZC3(GDE1);P46439(GSTM5);Q9H788(SH2D4A);Q9H477(RBKS);P16435(POR);Q9UHK6(AMACR);Q02153(GUCY1B1);Q7Z5P4(HSD17B13);Q13011(E…
2-Benzyl-5-hydroxymethyl-1,3-dioxolane	227.128	6.45675	-	3.02976	0.629651	1.93153e-05
PA(i-18:0/18:1(9Z)-O(12,13))	749.532	7.105	-	2.10498	0.735921	0.00681128
Dda-tetracycline	440.073	1.1205	-	1.92547	1.27772	0.00865318
CL(i-13:0/18:2(9Z,11Z)/i-12:0/i-12:0)	612.413	6.22973	C05980	2.41282	0.708031	0.00401998	map00564	O14495(PLPP3);Q7L5N7(LPCAT2);P28329(CHAT);Q9NRZ7(AGPAT3);Q8IY17(PNPLA6);Q9C0D9(SELENOI);O14939(PLD2);Q96N66(MBOAT7);P23141(CES1);P80404(ABAT);Q8IV08(PLD3);O14735(CDIPT);Q3MJ16(PLA2G4E);Q99447(PCYT2);Q5VWZ2(LYPLAL1);Q99943(AGPAT1);P43155(CRAT);O95674(CDS2);Q8N335(GPD1L);Q99828(CIB1);P61601(NCALD);Q9Y6K0(CEPT1);Q13393(PLD1);Q6P1A2(LPCAT3);P14555(PLA2G2A);P63098(PPP3R1);Q9Y259(CHKB);Q9UKY3(CES1P1);Q…	Q9C0D9(SELENOI);P80404(ABAT);Q13393(PLD1);P14555(PLA2G2A);Q9UKY3(CES1P1);P50416(CPT1A);Q8WWY8(LIPH);Q8WUD6(CHPT1)
CL(i-13:0/18:2(9Z,11Z)/i-12:0/i-12:0)	612.413	6.22973	C05980	2.41282	0.708031	0.00401998	map01100	Q8NCL4(GALNT6);Q96I99(SUCLG2);Q99943(AGPAT1);P23526(AHCY);P30613(PKLR);Q96N66(MBOAT7);P00167(CYB5A);Q9NSC7(ST6GALNAC1);Q15274(QPRT);P08574(CYC1);Q13884(SNTB1);P20936(RASA1);Q8N0U8(VKORC1L1);Q13057(COASY);Q8TB45(DEPTOR);P00558(PGK1);Q9P2T1(GMPR2);Q00722(PLCB2);P22392(NME2);Q9NZL9(MAT2B);P04075(ALDOA);Q13724(MOGS);Q9NQ88(TIGAR);Q96LJ7(DHRS1);P13995(MTHFD2);Q6UB35(MTHFD1L);Q14247(CTTN);Q01970(PLCB3)…	Q8NCL4(GALNT6);P30613(PKLR);Q9NSC7(ST6GALNAC1);P20936(RASA1);Q6UB35(MTHFD1L);P52209(PGD);Q7L5L3(GDPD3);P30043(BLVRB);Q9UBM7(DHCR7);Q53FA7(TP53I3);P32322(PYCR1);Q86YB7(ECHDC2);P08842(STS);Q9C0D9(SELENOI);Q96DC8(ECHDC3);O00763(ACACB);O60476(MAN1A2);P51178(PLCD1);Q9H7F0(ATP13A3);Q9NZC3(GDE1);P46439(GSTM5);Q9H788(SH2D4A);Q9H477(RBKS);P16435(POR);Q9UHK6(AMACR);Q02153(GUCY1B1);Q7Z5P4(HSD17B13);Q13011(E…
PG(16:1(9Z)/PGE2)	839.473	6.36182	-	2.26719	0.818825	0.000166312
Scymnol	486.378	6.4357	C16260	3.22658	0.680404	0.000145223
{4-[({2-[3-Fluoro-4-(Trifluoromethyl)phenyl]-4-Methyl-1,3-Thiazol-5-Yl}methyl)sulfanyl]-2-Methylphenoxy}acetic Acid	513.096	3.22472	C15625	1.6051	1.30368	0.0142351
Niflumic Acid	327.031	1.41448	C13698	2.51914	1.48245	0.00260835
2-(1-Ethoxyethoxy)propanoic acid	195.123	6.61528	-	3.03385	1.58144	2.20569e-05
Biotin sulfone	241.064	4.26113	C20387	2.17974	1.43481	0.0014255	map00780	O95498(VNN2);P49327(FASN);Q9NWU1(OXSM);O95497(VNN1);P43251(BTD)	O95498(VNN2)
N-[(3a,5b,7a)-3-hydroxy-24-oxo-7-(sulfooxy)cholan-24-yl]-Glycine	528.264	7.51205	C01324	1.67717	1.24691	0.0108316
Mycarose	195.122	6.55698	-	3.15391	1.60688	6.5725e-07
17-Deoxyestradiol	530.404	6.4199	C02453	3.07257	0.714693	3.34463e-05
2,4-Thiazolidinedicarboxylic acid, 2-methyl-	192.032	0.95405	-	1.59034	1.2064	0.0336664
Pantetheine 4'-phosphate	359.103	3.44937	C01134	1.99958	0.767488	0.0247533	map00770	Q9H2A2(ALDH8A1);P51648(ALDH3A2);P51649(ALDH5A1);P47895(ALDH1A3);Q14194(CRMP1);Q14195(DPYSL3);P30038(ALDH4A1);Q13057(COASY);Q8IZ83(ALDH16A1);Q9HAB8(PPCS);P00352(ALDH1A1);O94788(ALDH1A2);O95498(VNN2);Q02127(DHODH);P43353(ALDH3B1);P49189(ALDH9A1);Q3SY69(ALDH1L2);Q8WVC6(DCAKD);P30837(ALDH1B1);Q9NRN7(AASDHPPT);Q9BZ23(PANK2);P43251(BTD);Q02252(ALDH6A1);Q13822(ENPP2);Q12882(DPYD);O95497(VNN1);O14531(DPY…	Q9H2A2(ALDH8A1);P51649(ALDH5A1);Q14194(CRMP1);P30038(ALDH4A1);P00352(ALDH1A1);O94788(ALDH1A2);O95498(VNN2);Q13822(ENPP2);O14531(DPYSL4);Q6UWV6(ENPP7);P05091(ALDH2);P22413(ENPP1);Q16555(DPYSL2)
Pantetheine 4'-phosphate	359.103	3.44937	C01134	1.99958	0.767488	0.0247533	map01100	Q8NCL4(GALNT6);Q96I99(SUCLG2);Q99943(AGPAT1);P23526(AHCY);P30613(PKLR);Q96N66(MBOAT7);P00167(CYB5A);Q9NSC7(ST6GALNAC1);Q15274(QPRT);P08574(CYC1);Q13884(SNTB1);P20936(RASA1);Q8N0U8(VKORC1L1);Q13057(COASY);Q8TB45(DEPTOR);P00558(PGK1);Q9P2T1(GMPR2);Q00722(PLCB2);P22392(NME2);Q9NZL9(MAT2B);P04075(ALDOA);Q13724(MOGS);Q9NQ88(TIGAR);Q96LJ7(DHRS1);P13995(MTHFD2);Q6UB35(MTHFD1L);Q14247(CTTN);Q01970(PLCB3)…	Q8NCL4(GALNT6);P30613(PKLR);Q9NSC7(ST6GALNAC1);P20936(RASA1);Q6UB35(MTHFD1L);P52209(PGD);Q7L5L3(GDPD3);P30043(BLVRB);Q9UBM7(DHCR7);Q53FA7(TP53I3);P32322(PYCR1);Q86YB7(ECHDC2);P08842(STS);Q9C0D9(SELENOI);Q96DC8(ECHDC3);O00763(ACACB);O60476(MAN1A2);P51178(PLCD1);Q9H7F0(ATP13A3);Q9NZC3(GDE1);P46439(GSTM5);Q9H788(SH2D4A);Q9H477(RBKS);P16435(POR);Q9UHK6(AMACR);Q02153(GUCY1B1);Q7Z5P4(HSD17B13);Q13011(E…
Pantetheine 4'-phosphate	359.103	3.44937	C01134	1.99958	0.767488	0.0247533	map01240	P23381(WARS1);P05165(PCCA);O75911(DHRS3);Q15274(QPRT);P49327(FASN);Q96I15(SCLY);Q8N0U8(VKORC1L1);Q13057(COASY);Q9Y3D8(AK6);Q9Y5P6(GMPPB);P30038(ALDH4A1);Q6XQN6(NAPRT);Q02127(DHODH);P22392(NME2);Q9NZL9(MAT2B);P27708(CAD);Q9H2A2(ALDH8A1);P15559(NQO1);Q96LJ7(DHRS1);P13995(MTHFD2);Q6UB35(MTHFD1L);Q3SXM5(HSDL1);O15270(SPTLC2);Q9BZ23(PANK2);P56937(HSD17B7);P00390(GSR);Q9H008(LHPP);Q6YN16(HSDL2);Q6IA69(…	P30038(ALDH4A1);Q9H2A2(ALDH8A1);Q6UB35(MTHFD1L);Q8N4T8(CBR4);Q9NVS9(PNPO);Q92820(GGH);O00763(ACACB);Q9BPW9(DHRS9);O14531(DPYSL4);P28845(HSD11B1);P05091(ALDH2);Q7Z5P4(HSD17B13);P17516(AKR1C4);P36551(CPOX);P13716(ALAD);P38435(GGCX);P15428(HPGD);P80365(HSD11B2);Q5EBM0(CMPK2);Q03393(PTS);P51649(ALDH5A1);P00352(ALDH1A1);O94788(ALDH1A2);P05186(ALPL);Q96EY8(MMAB);P14061(HSD17B1);Q7Z4W1(DCXR)
Tris(butoxyethyl)phosphate	399.25	6.34597	C14446	2.83718	0.447486	0.0197618
Cer(d16:1/20:4(6Z,8E,10E,14Z)-2OH(5S,12R))	554.462	6.58342	-	3.0219	1.44307	0.000133639
5-Androstenediol	598.488	6.49895	C04295	4.15614	2.73518	1.05253e-06	map00140	Q53GQ0(HSD17B12);P17516(AKR1C4);Q8N4T8(CBR4);Q8NBQ5(HSD17B11);O75911(DHRS3);P14550(AKR1A1);Q96SQ9(CYP2S1);P05108(CYP11A1);Q16850(CYP51A1);Q6IAN0(DHRS7B);P21964(COMT);Q9BPW9(DHRS9);P15121(AKR1B1);Q8NBN7(RDH13);O00338(SULT1C2);Q16698(DECR1);P51690(ARSL);O75828(CBR3);Q8IZV5(RDH10);P24557(TBXAS1);P15289(ARSA);Q7Z4W1(DCXR);Q9HBH5(RDH14);P50225(SULT1A1);Q16678(CYP1B1);Q96LJ7(DHRS1);Q06136(KDSR);Q86VU5(…	P17516(AKR1C4);Q8N4T8(CBR4);P05108(CYP11A1);Q9BPW9(DHRS9);P51690(ARSL);Q7Z4W1(DCXR);Q16678(CYP1B1);P08842(STS);P28845(HSD11B1);P14061(HSD17B1);Q7Z5P4(HSD17B13);P15428(HPGD);P14060(HSD3B1);P80365(HSD11B2);P11511(CYP19A1)
5-Androstenediol	598.488	6.49895	C04295	4.15614	2.73518	1.05253e-06	map04913	Q9Y2H1(STK38L);P31749(AKT1);P08069(IGF1R);Q96SQ9(CYP2S1);Q92673(SORL1);P08476(INHBA);P16234(PDGFRA);P63096(GNAI1);Q16678(CYP1B1);Q05397(PTK2);Q96RR4(CAMKK2);Q3SXM5(HSDL1);P08581(MET);Q01974(ROR2);P09471(GNAO1);Q6YN16(HSDL2);P51812(RPS6KA3);O14920(IKBKB);Q02338(BDH1);O75116(ROCK2);O15530(PDPK1);Q03113(GNA12);P15121(AKR1B1);Q8NBN7(RDH13);Q7KZI7(MARK2);Q9BPW9(DHRS9);P17948(FLT1);Q9BZL6(PRKD2);Q14289…	Q16678(CYP1B1);Q03113(GNA12);Q9BPW9(DHRS9);P17948(FLT1);Q02153(GUCY1B1);A6NKQ9(CGB1);Q05513(PRKCZ);P17516(AKR1C4);Q9BXB1(LGR4);Q99988(GDF15);P80365(HSD11B2);P01215(CGA);P05108(CYP11A1);P61812(TGFB2);P14061(HSD17B1);P14060(HSD3B1);P11511(CYP19A1)
2-({2-[(1,3-dimethyl-1h-pyrazol-5-yl)amino]-2-oxoethyl}sulfanyl)acetic acid	276.101	1.17942	-	1.94654	1.23476	0.00149452
5-Methoxytryptophan	279.099	4.97225	-	1.99907	1.35213	0.0100113
3-Oxoheptanoyl-CoA	467.619	0.470333	C11421	1.54612	1.20447	0.000910556
PI(PGF1alpha/22:2(13Z,16Z))	507.303	6.3249	-	3.7327	0.526032	3.5803e-05
PG(i-14:0/PGJ2)	795.446	6.37237	-	3.1396	0.668307	7.64985e-05
5'-Deoxy-5'-fluorouridine	279.101	2.61067	C12739	1.80751	1.2245	0.00620544	map00983	P12268(IMPDH2);Q92626(PXDN);Q14194(CRMP1);P05164(MPO);Q9BY32(ITPA);P51580(TPMT);P23141(CES1);Q96SQ9(CYP2S1);Q7LG56(RRM2B);P09488(GSTM1);Q8N0W4(NLGN4X);P36959(GMPR);Q16854(DGUOK);Q16831(UPP1);Q14195(DPYSL3);P30711(GSTT1);P09211(GSTP1);P08263(GSTA1);P19971(TYMP);Q9P2T1(GMPR2);P30085(CMPK1);P27707(DCK);Q02127(DHODH);O60760(HPGDS);O14684(PTGES);P18440(NAT1);P11172(UMPS);P20292(ALOX5AP);Q06278(AOX1);Q…	Q92626(PXDN);Q14194(CRMP1);P05164(MPO);P09488(GSTM1);P30711(GSTT1);P08263(GSTA1);P27707(DCK);O60760(HPGDS);O14684(PTGES);Q16678(CYP1B1);Q9UKY3(CES1P1);P04183(TK1);O14531(DPYSL4);P05108(CYP11A1);O14880(MGST3);P21266(GSTM3);P32320(CDA);P46439(GSTM5);Q16555(DPYSL2);P11511(CYP19A1)
Ixabepilone	527.26	6.3619	-	2.83266	1.89168	0.00518908
N-Glycolylneuraminic acid	370.073	0.61365	C03410	2.05411	1.23711	0.00413829	map00520	P00387(CYB5R3);Q96EK6(GNPNAT1);Q96G03(PGM2);P51606(RENBP);P00167(CYB5A);Q9NR50(EIF2B3);Q16851(UGP2);P07902(GALT);P19367(HK1);O60701(UGDH);Q9UJ70(NAGK);P46926(GNPDA1);Q8N0W3(FCSK);P06865(HEXA);Q8NFW8(CMAS);P52790(HK3);P36871(PGM1);Q9Y5P6(GMPPB);Q06210(GFPT1);Q9BXD5(NPL);P34949(MPI);O95394(PGM3);P36222(CHI3L1);Q15124(PGM5);O43169(CYB5B);Q2TB90(HKDC1);Q9Y303(AMDHD2);P51570(GALK1);Q96IJ6(GMPPA);Q9UHQ…	P51606(RENBP);Q8NFW8(CMAS);Q9Y303(AMDHD2);Q8TDQ7(GNPDA2)
DG(22:6(4Z,7Z,11E,13Z,15E,19Z)-2OH(10S,17)/i-13:0/0:0)	672.488	6.29857	-	3.38541	1.83836	7.09529e-05
(2,6-Dioxo-3H-purin-9-yl) pyridine-3-carboxylate	318.046	1.09872	-	2.12492	1.32163	0.0103444
9-Hydroxy-10-O-D-glucuronoside-12Z-octadecenoate	508.311	5.97435	-	4.1468	0.229651	0.00018537
3,4-Dihydroxyphenylethanol-4-diglucoside	513.141	3.22427	-	1.40817	1.2157	0.0263182
Isoquercitroside	503.058	1.13642	C05623	1.92608	1.28491	0.0115042	map01100	Q8NCL4(GALNT6);Q96I99(SUCLG2);Q99943(AGPAT1);P23526(AHCY);P30613(PKLR);Q96N66(MBOAT7);P00167(CYB5A);Q9NSC7(ST6GALNAC1);Q15274(QPRT);P08574(CYC1);Q13884(SNTB1);P20936(RASA1);Q8N0U8(VKORC1L1);Q13057(COASY);Q8TB45(DEPTOR);P00558(PGK1);Q9P2T1(GMPR2);Q00722(PLCB2);P22392(NME2);Q9NZL9(MAT2B);P04075(ALDOA);Q13724(MOGS);Q9NQ88(TIGAR);Q96LJ7(DHRS1);P13995(MTHFD2);Q6UB35(MTHFD1L);Q14247(CTTN);Q01970(PLCB3)…	Q8NCL4(GALNT6);P30613(PKLR);Q9NSC7(ST6GALNAC1);P20936(RASA1);Q6UB35(MTHFD1L);P52209(PGD);Q7L5L3(GDPD3);P30043(BLVRB);Q9UBM7(DHCR7);Q53FA7(TP53I3);P32322(PYCR1);Q86YB7(ECHDC2);P08842(STS);Q9C0D9(SELENOI);Q96DC8(ECHDC3);O00763(ACACB);O60476(MAN1A2);P51178(PLCD1);Q9H7F0(ATP13A3);Q9NZC3(GDE1);P46439(GSTM5);Q9H788(SH2D4A);Q9H477(RBKS);P16435(POR);Q9UHK6(AMACR);Q02153(GUCY1B1);Q7Z5P4(HSD17B13);Q13011(E…
Tyrosyl-Cysteine	267.08	5.96365	-	1.92825	1.22034	0.00119991
3-Benzoyloxy-11-oxo-12-ursen-28-oic acid	597.36	6.2616	-	1.51413	0.828794	0.0341581
Diphenylphosphinic acid	219.057	5.95832	-	1.31681	0.758556	0.0215828
Homocapsaicin	680.458	6.2456	C20215	1.54129	0.830305	0.0247567
3,4-dihydroxybenzenesulfonic acid	188.986	3.65257	-	1.68729	1.20764	0.0104919
L-Histidine trimethylbetaine	198.124	0.714733	C05575	1.51634	1.22649	0.0198181	map00340	P21397(MAOA);Q9H2A2(ALDH8A1);P51648(ALDH3A2);P51649(ALDH5A1);Q16853(AOC3);P47895(ALDH1A3);P30038(ALDH4A1);Q8IZ83(ALDH16A1);P00352(ALDH1A1);O94788(ALDH1A2);P43353(ALDH3B1);P49189(ALDH9A1);P27338(MAOB);P30837(ALDH1B1);O60341(KDM1A);Q02252(ALDH6A1);Q96HD9(ACY3);Q6P996(PDXDC1);P19801(AOC1);Q96KP4(CNDP2);P05091(ALDH2);P49419(ALDH7A1);Q96RQ9(IL4I1);P50135(HNMT);Q3SY69(ALDH1L2)	Q9H2A2(ALDH8A1);P51649(ALDH5A1);P30038(ALDH4A1);P00352(ALDH1A1);O94788(ALDH1A2);P27338(MAOB);P19801(AOC1);P05091(ALDH2)
L-Histidine trimethylbetaine	198.124	0.714733	C05575	1.51634	1.22649	0.0198181	map01100	Q8NCL4(GALNT6);Q96I99(SUCLG2);Q99943(AGPAT1);P23526(AHCY);P30613(PKLR);Q96N66(MBOAT7);P00167(CYB5A);Q9NSC7(ST6GALNAC1);Q15274(QPRT);P08574(CYC1);Q13884(SNTB1);P20936(RASA1);Q8N0U8(VKORC1L1);Q13057(COASY);Q8TB45(DEPTOR);P00558(PGK1);Q9P2T1(GMPR2);Q00722(PLCB2);P22392(NME2);Q9NZL9(MAT2B);P04075(ALDOA);Q13724(MOGS);Q9NQ88(TIGAR);Q96LJ7(DHRS1);P13995(MTHFD2);Q6UB35(MTHFD1L);Q14247(CTTN);Q01970(PLCB3)…	Q8NCL4(GALNT6);P30613(PKLR);Q9NSC7(ST6GALNAC1);P20936(RASA1);Q6UB35(MTHFD1L);P52209(PGD);Q7L5L3(GDPD3);P30043(BLVRB);Q9UBM7(DHCR7);Q53FA7(TP53I3);P32322(PYCR1);Q86YB7(ECHDC2);P08842(STS);Q9C0D9(SELENOI);Q96DC8(ECHDC3);O00763(ACACB);O60476(MAN1A2);P51178(PLCD1);Q9H7F0(ATP13A3);Q9NZC3(GDE1);P46439(GSTM5);Q9H788(SH2D4A);Q9H477(RBKS);P16435(POR);Q9UHK6(AMACR);Q02153(GUCY1B1);Q7Z5P4(HSD17B13);Q13011(E…
N'-nitrosonornicotine	195.122	6.49895	C16452	2.78973	1.48815	5.15522e-06	map05207	Q02447(SP3);Q9Y2H1(STK38L);P31749(AKT1);P14317(HCLS1);Q9Y3L5(RAP2C);O00629(KPNA4);Q96SQ9(CYP2S1);P52294(KPNA1);P10415(BCL2);P52292(KPNA2);O75886(STAM2);P09211(GSTP1);P07900(HSP90AA1);P08263(GSTA1);P49407(ARRB1);P62993(GRB2);P61225(RAP2B);Q15382(RHEB);Q8NEB9(PIK3C3);O14684(PTGES);Q13451(FKBP5);Q8N3R9(PALS1);P63096(GNAI1);P28702(RXRB);O00443(PIK3C2A);P49796(RGS3);P43403(ZAP70);Q05397(PTK2);Q96RR4(C…	P08263(GSTA1);O14684(PTGES);P28702(RXRB);P37023(ACVRL1);P04626(ERBB2);Q03113(GNA12);P20936(RASA1);P42224(STAT1);Q96DT7(ZBTB10);O00750(PIK3C2B);Q8TD08(MAPK15);P46439(GSTM5);Q16678(CYP1B1);P29323(EPHB2);Q02153(GUCY1B1);P09488(GSTM1);P36897(TGFBR1);P30711(GSTT1);Q7LDG7(RASGRP2);Q05513(PRKCZ);O60760(HPGDS);A9QM74(KPNA7);P19174(PLCG1);P21266(GSTM3);O14807(MRAS);O15084(ANKRD28);O14880(MGST3);P05108(CYP…
CL(i-12:0/i-12:0/18:2(9Z,11Z)/i-13:0)	612.406	5.96365	C05980	3.08571	1.75783	0.000765578	map00564	O14495(PLPP3);Q7L5N7(LPCAT2);P28329(CHAT);Q9NRZ7(AGPAT3);Q8IY17(PNPLA6);Q9C0D9(SELENOI);O14939(PLD2);Q96N66(MBOAT7);P23141(CES1);P80404(ABAT);Q8IV08(PLD3);O14735(CDIPT);Q3MJ16(PLA2G4E);Q99447(PCYT2);Q5VWZ2(LYPLAL1);Q99943(AGPAT1);P43155(CRAT);O95674(CDS2);Q8N335(GPD1L);Q99828(CIB1);P61601(NCALD);Q9Y6K0(CEPT1);Q13393(PLD1);Q6P1A2(LPCAT3);P14555(PLA2G2A);P63098(PPP3R1);Q9Y259(CHKB);Q9UKY3(CES1P1);Q…	Q9C0D9(SELENOI);P80404(ABAT);Q13393(PLD1);P14555(PLA2G2A);Q9UKY3(CES1P1);P50416(CPT1A);Q8WWY8(LIPH);Q8WUD6(CHPT1)
CL(i-12:0/i-12:0/18:2(9Z,11Z)/i-13:0)	612.406	5.96365	C05980	3.08571	1.75783	0.000765578	map01100	Q8NCL4(GALNT6);Q96I99(SUCLG2);Q99943(AGPAT1);P23526(AHCY);P30613(PKLR);Q96N66(MBOAT7);P00167(CYB5A);Q9NSC7(ST6GALNAC1);Q15274(QPRT);P08574(CYC1);Q13884(SNTB1);P20936(RASA1);Q8N0U8(VKORC1L1);Q13057(COASY);Q8TB45(DEPTOR);P00558(PGK1);Q9P2T1(GMPR2);Q00722(PLCB2);P22392(NME2);Q9NZL9(MAT2B);P04075(ALDOA);Q13724(MOGS);Q9NQ88(TIGAR);Q96LJ7(DHRS1);P13995(MTHFD2);Q6UB35(MTHFD1L);Q14247(CTTN);Q01970(PLCB3)…	Q8NCL4(GALNT6);P30613(PKLR);Q9NSC7(ST6GALNAC1);P20936(RASA1);Q6UB35(MTHFD1L);P52209(PGD);Q7L5L3(GDPD3);P30043(BLVRB);Q9UBM7(DHCR7);Q53FA7(TP53I3);P32322(PYCR1);Q86YB7(ECHDC2);P08842(STS);Q9C0D9(SELENOI);Q96DC8(ECHDC3);O00763(ACACB);O60476(MAN1A2);P51178(PLCD1);Q9H7F0(ATP13A3);Q9NZC3(GDE1);P46439(GSTM5);Q9H788(SH2D4A);Q9H477(RBKS);P16435(POR);Q9UHK6(AMACR);Q02153(GUCY1B1);Q7Z5P4(HSD17B13);Q13011(E…
Indinavir	596.363	5.97435	C07051	3.21394	0.451874	0.000339667	map04976	Q9Y2H1(STK38L);O75751(SLC22A3);P31749(AKT1);Q9NUT2(ABCB8);Q92673(SORL1);P33527(ABCC1);O75185(ATP2C2);Q03518(TAP1);Q03519(TAP2);P98194(ATP2C1);P08183(ABCB1);Q6P1M0(SLC27A4);P50225(SULT1A1);P63096(GNAI1);P28702(RXRB);Q96RR4(CAMKK2);P09471(GNAO1);Q14344(GNA13);P51812(RPS6KA3);Q16647(PTGIS);O15438(ABCC3);O14920(IKBKB);P61221(ABCE1);O75110(ATP9A);P04920(SLC4A2);O75116(ROCK2);O15530(PDPK1);Q53FZ2(ACSM3…	O75751(SLC22A3);P33527(ABCC1);O75185(ATP2C2);P08183(ABCB1);P28702(RXRB);Q03113(GNA12);P55064(AQP5);Q92959(SLCO2A1);O00168(FXYD1);Q9H7F0(ATP13A3);Q02153(GUCY1B1);O94911(ABCA8);O14975(SLC27A2);O95342(ABCB11);Q05513(PRKCZ);P02730(SLC4A1);P07451(CA3);P00915(CA1);P11169(SLC2A3);P11166(SLC2A1);Q96BD0(SLCO4A1);Q96CM8(ACSF2);Q9NSA0(SLC22A11);P05108(CYP11A1);P22760(AADAC);P11511(CYP19A1)
Phenylacetyl glutaminate	287.1	4.2772	-	1.4701	1.22653	0.0137223
15(S)-Fluprostenol isopropyl ester	537.184	4.86503	-	1.53928	1.25321	0.00823925
Metoprolol	300.217	5.84663	C07202	2.40167	1.8228	0.0157253
N(6)-Methyllysine	193.155	0.5818	C02728	1.38769	1.20173	0.0262732
PA(PGE1/P-16:0)	744.491	6.19273	-	3.12661	0.620825	7.80781e-05
PG(a-25:0/PGF1alpha)	966.692	6.40937	-	3.36857	1.54368	2.10563e-05
O-methoxyphenyl sulfate	203.002	4.97755	-	1.68962	1.39042	0.00284149
PS(14:1(9Z)/20:0)	794.562	6.3565	C02737	2.7216	0.752181	4.7251e-05	map00260	P21397(MAOA);P32929(CTH);Q96GA7(SDSL);Q9GZT4(SRR);Q14353(GAMT);P34896(SHMT1);P34897(SHMT2);P51648(ALDH3A2);P51649(ALDH5A1);Q16853(AOC3);Q99707(MTR);P47895(ALDH1A3);P18669(PGAM1);P30038(ALDH4A1);Q9UBQ7(GRHPR);Q9NUV7(SPTLC3);P09622(DLD);Q8NCN5(PDPR);P00352(ALDH1A1);O94788(ALDH1A2);P49189(ALDH9A1);P27338(MAOB);P30837(ALDH1B1);Q9NNW7(TXNRD2);P56545(CTBP2);O15270(SPTLC2);O60341(KDM1A);Q8NE62(CHDH);Q02…	P32929(CTH);Q96GA7(SDSL);Q9GZT4(SRR);P51649(ALDH5A1);P30038(ALDH4A1);P00352(ALDH1A1);O94788(ALDH1A2);P27338(MAOB);P23378(GLDC);Q9H2A2(ALDH8A1);O43175(PHGDH);P80404(ABAT);P19801(AOC1);P23434(GCSH);P05091(ALDH2)
PS(14:1(9Z)/20:0)	794.562	6.3565	C02737	2.7216	0.752181	4.7251e-05	map00564	O14495(PLPP3);Q7L5N7(LPCAT2);P28329(CHAT);Q9NRZ7(AGPAT3);Q8IY17(PNPLA6);Q9C0D9(SELENOI);O14939(PLD2);Q96N66(MBOAT7);P23141(CES1);P80404(ABAT);Q8IV08(PLD3);O14735(CDIPT);Q3MJ16(PLA2G4E);Q99447(PCYT2);Q5VWZ2(LYPLAL1);Q99943(AGPAT1);P43155(CRAT);O95674(CDS2);Q8N335(GPD1L);Q99828(CIB1);P61601(NCALD);Q9Y6K0(CEPT1);Q13393(PLD1);Q6P1A2(LPCAT3);P14555(PLA2G2A);P63098(PPP3R1);Q9Y259(CHKB);Q9UKY3(CES1P1);Q…	Q9C0D9(SELENOI);P80404(ABAT);Q13393(PLD1);P14555(PLA2G2A);Q9UKY3(CES1P1);P50416(CPT1A);Q8WWY8(LIPH);Q8WUD6(CHPT1)
PS(14:1(9Z)/20:0)	794.562	6.3565	C02737	2.7216	0.752181	4.7251e-05	map01100	Q8NCL4(GALNT6);Q96I99(SUCLG2);Q99943(AGPAT1);P23526(AHCY);P30613(PKLR);Q96N66(MBOAT7);P00167(CYB5A);Q9NSC7(ST6GALNAC1);Q15274(QPRT);P08574(CYC1);Q13884(SNTB1);P20936(RASA1);Q8N0U8(VKORC1L1);Q13057(COASY);Q8TB45(DEPTOR);P00558(PGK1);Q9P2T1(GMPR2);Q00722(PLCB2);P22392(NME2);Q9NZL9(MAT2B);P04075(ALDOA);Q13724(MOGS);Q9NQ88(TIGAR);Q96LJ7(DHRS1);P13995(MTHFD2);Q6UB35(MTHFD1L);Q14247(CTTN);Q01970(PLCB3)…	Q8NCL4(GALNT6);P30613(PKLR);Q9NSC7(ST6GALNAC1);P20936(RASA1);Q6UB35(MTHFD1L);P52209(PGD);Q7L5L3(GDPD3);P30043(BLVRB);Q9UBM7(DHCR7);Q53FA7(TP53I3);P32322(PYCR1);Q86YB7(ECHDC2);P08842(STS);Q9C0D9(SELENOI);Q96DC8(ECHDC3);O00763(ACACB);O60476(MAN1A2);P51178(PLCD1);Q9H7F0(ATP13A3);Q9NZC3(GDE1);P46439(GSTM5);Q9H788(SH2D4A);Q9H477(RBKS);P16435(POR);Q9UHK6(AMACR);Q02153(GUCY1B1);Q7Z5P4(HSD17B13);Q13011(E…
PS(14:1(9Z)/20:0)	794.562	6.3565	C02737	2.7216	0.752181	4.7251e-05	map05140	P18433(PTPRA);P05160(F13B);P31749(AKT1);P28068(HLA-DMB);P49006(MARCKSL1);P0C0L5(C4B);P28067(HLA-DMA);Q95460(MR1);Q03591(CFHR1);Q13523(PRPF4B);P04440(HLA-DPB1);P10321(HLA-C);P01889(HLA-B);P20936(RASA1);P08476(INHBA);P23469(PTPRE);P23468(PTPRD);Q13219(PAPPA);P04839(CYBB);P16435(POR);P18031(PTPN1);P43378(PTPN9);P01768(IGHV3-30);O43586(PSTPIP1);Q96B97(SH3KBP1);Q8IUH4(ZDHHC13);P13612(ITGA4);P01766(IGH…	P05160(F13B);P0C0L5(C4B);Q95460(MR1);Q03591(CFHR1);P20936(RASA1);P16435(POR);P01766(IGHV3-13);P01780(IGHV3-7);P10643(C7);P04003(C4BPA);Q9Y572(RIPK3);P30511(HLA-F);P42224(STAT1);Q5HYK7(SH3D19);Q12923(PTPN13);P23083(IGHV1-2);Q8TD08(MAPK15);P08648(ITGA5);P17693(HLA-G);P10586(PTPRF);P01920(HLA-DQB1);Q16825(PTPN21);P26992(CNTFR);P13762(HLA-DRB4);Q9UGT4(SUSD2);P17301(ITGA2);Q4LDE5(SVEP1);A6NMZ7(COL6A6)…
PS(14:1(9Z)/20:0)	794.562	6.3565	C02737	2.7216	0.752181	4.7251e-05	map05146	P51149(RAB7A);P51148(RAB5C);P04275(VWF);P08069(IGF1R);Q00722(PLCB2);P02461(COL3A1);Q14651(PLS1);P04278(SHBG);P01920(HLA-DQB1);Q95460(MR1);P55899(FCGRT);P04440(HLA-DPB1);P10321(HLA-C);P08572(COL4A2);Q15147(PLCB4);Q9Y2H1(STK38L);P08571(CD14);P55268(LAMB2);P02462(COL4A1);Q15149(PLEC);P78527(PRKDC);Q7RTP6(MICAL3);Q01638(IL1RL1);P07357(C8A);P20160(AZU1);P16435(POR);P24043(LAMA2);P08185(SERPINA6);P6309…	P02461(COL3A1);P01920(HLA-DQB1);Q95460(MR1);P08572(COL4A2);P08571(CD14);P55268(LAMB2);P02462(COL4A1);Q7RTP6(MICAL3);P07357(C8A);P20160(AZU1);P16435(POR);P02549(SPTA1);Q6W4X9(MUC6);P01766(IGHV3-13);P07358(C8B);P01780(IGHV3-7);P02776(PF4);P02775(PPBP);Q05707(COL14A1);Q9BW83(IFT27);P07093(SERPINE2);Q03113(GNA12);P30511(HLA-F);Q14315(FLNC);P50453(SERPINB9);P49863(GZMK);P08311(CTSG);P02748(C9);P08246(…
PS(14:1(9Z)/20:0)	794.562	6.3565	C02737	2.7216	0.752181	4.7251e-05	map05322	P19474(TRIM21);P05160(F13B);P28068(HLA-DMB);Q14651(PLS1);P28067(HLA-DMA);Q95460(MR1);P14222(PRF1);P04440(HLA-DPB1);P10321(HLA-C);P01889(HLA-B);Q15149(PLEC);Q13219(PAPPA);Q7RTP6(MICAL3);Q6UXH9(PAMR1);P0C0S5(H2AZ1);P01768(IGHV3-30);Q6PKG0(LARP1);Q4G0J3(LARP7);P01766(IGHV3-13);P0DOY2(IGLC2);P08174(CD55);P01782(IGHV3-9);P01780(IGHV3-7);P06331(IGHV4-34);P0DP01(IGHV1-8);Q69YQ0(SPECC1L);P20160(AZU1);P10…	P05160(F13B);Q95460(MR1);Q7RTP6(MICAL3);Q6UXH9(PAMR1);P01766(IGHV3-13);P01780(IGHV3-7);P20160(AZU1);P10643(C7);Q5TEC6(H3-7);P02549(SPTA1);P04003(C4BPA);P30511(HLA-F);Q14315(FLNC);O95361(TRIM16);P49863(GZMK);P07357(C8A);P08311(CTSG);P07358(C8B);P08246(ELANE);P0C0L5(C4B);P23083(IGHV1-2);P13671(C6);P12544(GZMA);P01920(HLA-DQB1);P62805(H4C1);P00738(HP);P13762(HLA-DRB4);Q4LDE5(SVEP1);P17693(HLA-G);O95…
Prephytoene diphosphate	740.478	6.14513	C03427	2.77011	0.565287	0.00294314	map01100	Q8NCL4(GALNT6);Q96I99(SUCLG2);Q99943(AGPAT1);P23526(AHCY);P30613(PKLR);Q96N66(MBOAT7);P00167(CYB5A);Q9NSC7(ST6GALNAC1);Q15274(QPRT);P08574(CYC1);Q13884(SNTB1);P20936(RASA1);Q8N0U8(VKORC1L1);Q13057(COASY);Q8TB45(DEPTOR);P00558(PGK1);Q9P2T1(GMPR2);Q00722(PLCB2);P22392(NME2);Q9NZL9(MAT2B);P04075(ALDOA);Q13724(MOGS);Q9NQ88(TIGAR);Q96LJ7(DHRS1);P13995(MTHFD2);Q6UB35(MTHFD1L);Q14247(CTTN);Q01970(PLCB3)…	Q8NCL4(GALNT6);P30613(PKLR);Q9NSC7(ST6GALNAC1);P20936(RASA1);Q6UB35(MTHFD1L);P52209(PGD);Q7L5L3(GDPD3);P30043(BLVRB);Q9UBM7(DHCR7);Q53FA7(TP53I3);P32322(PYCR1);Q86YB7(ECHDC2);P08842(STS);Q9C0D9(SELENOI);Q96DC8(ECHDC3);O00763(ACACB);O60476(MAN1A2);P51178(PLCD1);Q9H7F0(ATP13A3);Q9NZC3(GDE1);P46439(GSTM5);Q9H788(SH2D4A);Q9H477(RBKS);P16435(POR);Q9UHK6(AMACR);Q02153(GUCY1B1);Q7Z5P4(HSD17B13);Q13011(E…
4-Hydroxy-5-phenyltetrahydro-1,3-oxazin-2-one	238.072	5.80712	C16595	1.7246	1.20095	0.000170703	map00982	P21397(MAOA);Q9H2A2(ALDH8A1);P51648(ALDH3A2);P51649(ALDH5A1);P05108(CYP11A1);P09488(GSTM1);P47895(ALDH1A3);Q9Y2Q3(GSTK1);P30711(GSTT1);P09211(GSTP1);P20292(ALOX5AP);P08263(GSTA1);Q6UW02(CYP20A1);P00352(ALDH1A1);O94788(ALDH1A2);P30038(ALDH4A1);P24557(TBXAS1);O60760(HPGDS);P49189(ALDH9A1);P27338(MAOB);P30837(ALDH1B1);Q06278(AOX1);Q16678(CYP1B1);P28161(GSTM2);Q00796(SORD);O60341(KDM1A);Q02252(ALDH6A…	Q9H2A2(ALDH8A1);P51649(ALDH5A1);P05108(CYP11A1);P09488(GSTM1);P30711(GSTT1);P08263(GSTA1);P00352(ALDH1A1);O94788(ALDH1A2);P30038(ALDH4A1);O60760(HPGDS);P27338(MAOB);Q16678(CYP1B1);P46439(GSTM5);O14684(PTGES);P00325(ADH1B);O14880(MGST3);P21266(GSTM3);P05091(ALDH2);P11511(CYP19A1)
Indoxylsulfuric acid	212.002	4.77427	-	1.42364	1.25994	0.0213917
Androstenedione	611.355	6.39883	C00280	4.42253	0.374698	6.97153e-06	map00140	Q53GQ0(HSD17B12);P17516(AKR1C4);Q8N4T8(CBR4);Q8NBQ5(HSD17B11);O75911(DHRS3);P14550(AKR1A1);Q96SQ9(CYP2S1);P05108(CYP11A1);Q16850(CYP51A1);Q6IAN0(DHRS7B);P21964(COMT);Q9BPW9(DHRS9);P15121(AKR1B1);Q8NBN7(RDH13);O00338(SULT1C2);Q16698(DECR1);P51690(ARSL);O75828(CBR3);Q8IZV5(RDH10);P24557(TBXAS1);P15289(ARSA);Q7Z4W1(DCXR);Q9HBH5(RDH14);P50225(SULT1A1);Q16678(CYP1B1);Q96LJ7(DHRS1);Q06136(KDSR);Q86VU5(…	P17516(AKR1C4);Q8N4T8(CBR4);P05108(CYP11A1);Q9BPW9(DHRS9);P51690(ARSL);Q7Z4W1(DCXR);Q16678(CYP1B1);P08842(STS);P28845(HSD11B1);P14061(HSD17B1);Q7Z5P4(HSD17B13);P15428(HPGD);P14060(HSD3B1);P80365(HSD11B2);P11511(CYP19A1)
Androstenedione	611.355	6.39883	C00280	4.42253	0.374698	6.97153e-06	map01100	Q8NCL4(GALNT6);Q96I99(SUCLG2);Q99943(AGPAT1);P23526(AHCY);P30613(PKLR);Q96N66(MBOAT7);P00167(CYB5A);Q9NSC7(ST6GALNAC1);Q15274(QPRT);P08574(CYC1);Q13884(SNTB1);P20936(RASA1);Q8N0U8(VKORC1L1);Q13057(COASY);Q8TB45(DEPTOR);P00558(PGK1);Q9P2T1(GMPR2);Q00722(PLCB2);P22392(NME2);Q9NZL9(MAT2B);P04075(ALDOA);Q13724(MOGS);Q9NQ88(TIGAR);Q96LJ7(DHRS1);P13995(MTHFD2);Q6UB35(MTHFD1L);Q14247(CTTN);Q01970(PLCB3)…	Q8NCL4(GALNT6);P30613(PKLR);Q9NSC7(ST6GALNAC1);P20936(RASA1);Q6UB35(MTHFD1L);P52209(PGD);Q7L5L3(GDPD3);P30043(BLVRB);Q9UBM7(DHCR7);Q53FA7(TP53I3);P32322(PYCR1);Q86YB7(ECHDC2);P08842(STS);Q9C0D9(SELENOI);Q96DC8(ECHDC3);O00763(ACACB);O60476(MAN1A2);P51178(PLCD1);Q9H7F0(ATP13A3);Q9NZC3(GDE1);P46439(GSTM5);Q9H788(SH2D4A);Q9H477(RBKS);P16435(POR);Q9UHK6(AMACR);Q02153(GUCY1B1);Q7Z5P4(HSD17B13);Q13011(E…
Androstenedione	611.355	6.39883	C00280	4.42253	0.374698	6.97153e-06	map01522	Q02447(SP3);Q9Y2H1(STK38L);P31749(AKT1);P08069(IGF1R);Q9Y3L5(RAP2C);Q96SQ9(CYP2S1);Q92882(OSTF1);P10415(BCL2);Q14344(GNA13);P20936(RASA1);O14807(MRAS);P33527(ABCC1);Q8TD08(MAPK15);P62834(RAP1A);Q9NUT2(ABCB8);P62993(GRB2);Q15382(RHEB);O15211(RGL2);O15438(ABCC3);P08183(ABCB1);P16234(PDGFRA);P63096(GNAI1);Q16678(CYP1B1);P43405(SYK);P43403(ZAP70);Q05397(PTK2);Q96RR4(CAMKK2);Q14247(CTTN);P08581(MET);Q…	P20936(RASA1);O14807(MRAS);P33527(ABCC1);Q8TD08(MAPK15);P08183(ABCB1);Q16678(CYP1B1);P51511(MMP15);P37023(ACVRL1);O00750(PIK3C2B);Q03113(GNA12);P17948(FLT1);P22894(MMP8);Q86X55(CARM1);P24941(CDK2);O94911(ABCA8);Q6NY19(KANK3);O95342(ABCB11);P36897(TGFBR1);Q05513(PRKCZ);P28702(RXRB);P02751(FN1);P19174(PLCG1);Q7LDG7(RASGRP2);P29122(PCSK6);P04626(ERBB2);P29323(EPHB2);Q07817(BCL2L1);Q8IUX8(EGFL6);P147…
Androstenedione	611.355	6.39883	C00280	4.42253	0.374698	6.97153e-06	map04913	Q9Y2H1(STK38L);P31749(AKT1);P08069(IGF1R);Q96SQ9(CYP2S1);Q92673(SORL1);P08476(INHBA);P16234(PDGFRA);P63096(GNAI1);Q16678(CYP1B1);Q05397(PTK2);Q96RR4(CAMKK2);Q3SXM5(HSDL1);P08581(MET);Q01974(ROR2);P09471(GNAO1);Q6YN16(HSDL2);P51812(RPS6KA3);O14920(IKBKB);Q02338(BDH1);O75116(ROCK2);O15530(PDPK1);Q03113(GNA12);P15121(AKR1B1);Q8NBN7(RDH13);Q7KZI7(MARK2);Q9BPW9(DHRS9);P17948(FLT1);Q9BZL6(PRKD2);Q14289…	Q16678(CYP1B1);Q03113(GNA12);Q9BPW9(DHRS9);P17948(FLT1);Q02153(GUCY1B1);A6NKQ9(CGB1);Q05513(PRKCZ);P17516(AKR1C4);Q9BXB1(LGR4);Q99988(GDF15);P80365(HSD11B2);P01215(CGA);P05108(CYP11A1);P61812(TGFB2);P14061(HSD17B1);P14060(HSD3B1);P11511(CYP19A1)
Androstenedione	611.355	6.39883	C00280	4.42253	0.374698	6.97153e-06	map04917	P31749(AKT1);P10398(ARAF);Q9Y3L5(RAP2C);Q96SQ9(CYP2S1);Q92882(OSTF1);Q13523(PRPF4B);P20936(RASA1);O14807(MRAS);P07902(GALT);Q8TD08(MAPK15);O75462(CRLF1);P62993(GRB2);Q15382(RHEB);O15211(RGL2);Q12778(FOXO1);P28702(RXRB);P43405(SYK);P43403(ZAP70);Q05397(PTK2);Q14247(CTTN);O00329(PIK3CD);Q9NYV4(CDK12);Q9NSY1(BMP2K);Q13164(MAPK7);Q00534(CDK6);Q00537(CDK17);Q00536(CDK16);P60953(CDC42);P51812(RPS6KA3);…	P20936(RASA1);O14807(MRAS);Q8TD08(MAPK15);P28702(RXRB);P37023(ACVRL1);P36897(TGFBR1);P42224(STAT1);P0DML2(CSH1);P11166(SLC2A1);Q00978(IRF9);O15084(ANKRD28);P01236(PRL);A6NKQ9(CGB1);Q05513(PRKCZ);Q16678(CYP1B1);Q9BXB1(LGR4);P19174(PLCG1);Q7LDG7(RASGRP2);O00750(PIK3C2B);P11169(SLC2A3);P29323(EPHB2);P01215(CGA);Q8WUF5(PPP1R13L);P11511(CYP19A1)
Androstenedione	611.355	6.39883	C00280	4.42253	0.374698	6.97153e-06	map05200	Q02447(SP3);P50151(GNG10);P50150(GNG4);Q96FE7(PIK3IP1);P08572(COL4A2);P20936(RASA1);P31749(AKT1);O75610(LEFTY1);P23468(PTPRD);Q15269(PWP2);P16435(POR);P04070(PROC);Q05397(PTK2);P04278(SHBG);Q14247(CTTN);Q01970(PLCB3);Q8N392(ARHGAP18);Q01974(ROR2);Q00535(CDK5);Q00534(CDK6);Q00537(CDK17);P26232(CTNNA2);P15735(PHKG2);Q12931(TRAP1);P53671(LIMK2);P11233(RALA);Q99735(MGST2);P63000(RAC1);P11234(RALB);Q1…	Q96FE7(PIK3IP1);P08572(COL4A2);P20936(RASA1);P16435(POR);P49863(GZMK);Q9NQT8(KIF13B);Q8TDX7(NEK7);P51178(PLCD1);P11465(PSG2);P11169(SLC2A3);P46439(GSTM5);Q9H788(SH2D4A);Q5VV41(ARHGEF16);P01034(CST3);Q02153(GUCY1B1);A6NMZ7(COL6A6);Q13753(LAMC2);P51511(MMP15);O60760(HPGDS);Q9NPF0(CD320);P98160(HSPG2);O43240(KLK10);P12829(MYL4);P00750(PLAT);P04626(ERBB2);Q9UNX4(WDR3);Q8IUX8(EGFL6);Q14031(COL4A6);Q8W…
Androstenedione	611.355	6.39883	C00280	4.42253	0.374698	6.97153e-06	map05215	P98164(LRP2);Q9NQ36(SCUBE2);P31749(AKT1);P08069(IGF1R);P10398(ARAF);Q9Y3L5(RAP2C);Q96CV9(OPTN);P03952(KLKB1);Q96FE7(PIK3IP1);Q92882(OSTF1);P10415(BCL2);Q9HBL0(TNS1);P20936(RASA1);O14807(MRAS);Q9Y6K9(IKBKG);Q07817(BCL2L1);P78527(PRKDC);Q01638(IL1RL1);P62993(GRB2);P37275(ZEB1);Q15382(RHEB);Q14520(HABP2);Q12778(FOXO1);P16234(PDGFRA);P04070(PROC);O60885(BRD4);P43405(SYK);Q05397(PTK2);P02790(HPX);Q142…	Q96FE7(PIK3IP1);P20936(RASA1);O14807(MRAS);Q07817(BCL2L1);O60885(BRD4);P37023(ACVRL1);P20160(AZU1);P09488(GSTM1);P04626(ERBB2);P36897(TGFBR1);P49863(GZMK);O43278(SPINT1);Q8TD08(MAPK15);P08246(ELANE);P46439(GSTM5);P17948(FLT1);P08263(GSTA1);P29122(PCSK6);P22894(MMP8);P51511(MMP15);P24941(CDK2);P00734(F2);P12544(GZMA);Q05513(PRKCZ);O60760(HPGDS);P02751(FN1);P20231(TPSB2);P14923(JUP);P19174(PLCG1);P…
4-Oxo-1-(3-pyridyl)-1-butanone	162.056	5.9778	C19567	1.75733	1.20475	0.000209297	map00760	Q8TCD5(NT5C);Q9BQG2(NUDT12);P43490(NAMPT);Q9NWW6(NMRK1);P40261(NNMT);Q9H857(NT5DC2);Q13822(ENPP2);Q6XQN6(NAPRT);P21589(NT5E);Q9HAN9(NMNAT1);Q06278(AOX1);Q86UY8(NT5DC3);P00491(PNP);Q10588(BST1);Q8IXJ6(SIRT2);Q6IA69(NADSYN1);Q9NXA8(SIRT5);Q13126(MTAP);P28907(CD38);Q15274(QPRT);Q4G0N4(NADK2);Q6UWV6(ENPP7);Q13423(NNT);P22413(ENPP1);Q9NTG7(SIRT3);P49902(NT5C2);O95050(INMT)	Q9NWW6(NMRK1);Q13822(ENPP2);Q6UWV6(ENPP7);P22413(ENPP1);O95050(INMT)
4-Oxo-1-(3-pyridyl)-1-butanone	162.056	5.9778	C19567	1.75733	1.20475	0.000209297	map00980	Q53GQ0(HSD17B12);Q8N4T8(CBR4);Q8N5I4(DHRSX);Q9H2A2(ALDH8A1);P16152(CBR1);P50225(SULT1A1);O75911(DHRS3);P51648(ALDH3A2);Q96SQ9(CYP2S1);P05108(CYP11A1);P09488(GSTM1);Q6IAN0(DHRS7B);P47895(ALDH1A3);P15121(AKR1B1);Q9Y2Q3(GSTK1);P30038(ALDH4A1);P09211(GSTP1);P20292(ALOX5AP);P07099(EPHX1);P08263(GSTA1);Q6UW02(CYP20A1);P00352(ALDH1A1);O94788(ALDH1A2);O75828(CBR3);Q8TC12(RDH11);P24557(TBXAS1);O60760(HPGD…	Q8N4T8(CBR4);Q9H2A2(ALDH8A1);P05108(CYP11A1);P09488(GSTM1);P30038(ALDH4A1);P08263(GSTA1);P00352(ALDH1A1);O94788(ALDH1A2);O60760(HPGDS);P30711(GSTT1);Q9BPW9(DHRS9);Q16678(CYP1B1);P46439(GSTM5);P17516(AKR1C4);P51649(ALDH5A1);O14684(PTGES);P00325(ADH1B);P28845(HSD11B1);O14880(MGST3);P21266(GSTM3);P05091(ALDH2);P14061(HSD17B1);Q7Z5P4(HSD17B13);P80365(HSD11B2);P11511(CYP19A1)
4-Oxo-1-(3-pyridyl)-1-butanone	162.056	5.9778	C19567	1.75733	1.20475	0.000209297	map01100	Q8NCL4(GALNT6);Q96I99(SUCLG2);Q99943(AGPAT1);P23526(AHCY);P30613(PKLR);Q96N66(MBOAT7);P00167(CYB5A);Q9NSC7(ST6GALNAC1);Q15274(QPRT);P08574(CYC1);Q13884(SNTB1);P20936(RASA1);Q8N0U8(VKORC1L1);Q13057(COASY);Q8TB45(DEPTOR);P00558(PGK1);Q9P2T1(GMPR2);Q00722(PLCB2);P22392(NME2);Q9NZL9(MAT2B);P04075(ALDOA);Q13724(MOGS);Q9NQ88(TIGAR);Q96LJ7(DHRS1);P13995(MTHFD2);Q6UB35(MTHFD1L);Q14247(CTTN);Q01970(PLCB3)…	Q8NCL4(GALNT6);P30613(PKLR);Q9NSC7(ST6GALNAC1);P20936(RASA1);Q6UB35(MTHFD1L);P52209(PGD);Q7L5L3(GDPD3);P30043(BLVRB);Q9UBM7(DHCR7);Q53FA7(TP53I3);P32322(PYCR1);Q86YB7(ECHDC2);P08842(STS);Q9C0D9(SELENOI);Q96DC8(ECHDC3);O00763(ACACB);O60476(MAN1A2);P51178(PLCD1);Q9H7F0(ATP13A3);Q9NZC3(GDE1);P46439(GSTM5);Q9H788(SH2D4A);Q9H477(RBKS);P16435(POR);Q9UHK6(AMACR);Q02153(GUCY1B1);Q7Z5P4(HSD17B13);Q13011(E…
4-Oxo-1-(3-pyridyl)-1-butanone	162.056	5.9778	C19567	1.75733	1.20475	0.000209297	map05204	Q53GQ0(HSD17B12);Q8N4T8(CBR4);Q8NBQ5(HSD17B11);P16152(CBR1);O75911(DHRS3);Q96SQ9(CYP2S1);P05108(CYP11A1);P09488(GSTM1);Q6IAN0(DHRS7B);Q9BPW9(DHRS9);P15121(AKR1B1);Q9Y2Q3(GSTK1);P30711(GSTT1);P09211(GSTP1);P20292(ALOX5AP);P08263(GSTA1);Q6UW02(CYP20A1);P24557(TBXAS1);O60760(HPGDS);Q9HBH5(RDH14);P50225(SULT1A1);O00338(SULT1C2);Q16678(CYP1B1);P28161(GSTM2);Q96LJ7(DHRS1);Q06136(KDSR);Q3SXM5(HSDL1);O75…	Q8N4T8(CBR4);P05108(CYP11A1);P09488(GSTM1);Q9BPW9(DHRS9);P30711(GSTT1);P08263(GSTA1);O60760(HPGDS);Q16678(CYP1B1);P46439(GSTM5);P17516(AKR1C4);O14684(PTGES);P28845(HSD11B1);O14880(MGST3);P21266(GSTM3);P14061(HSD17B1);Q7Z5P4(HSD17B13);P80365(HSD11B2);P11511(CYP19A1)
Alisol A 24-acetate	546.384	6.05455	-	2.3767	1.3657	0.0170584
2'-Deoxyinosine	253.093	3.26237	C05512	1.60465	1.2244	0.00221833	map00230	Q01433(AMPD2);P12268(IMPDH2);Q9BSD7(NTPCR);Q8TCD5(NT5C);Q8N4P3(HDDC3);O43252(PAPSS1);Q9BY32(ITPA);P54819(AK2);Q6PCE3(PGM2L1);P11908(PRPS2);Q96G03(PGM2);Q14432(PDE3A);P31939(ATIC);Q14558(PRPSAP1);Q6UWV6(ENPP7);Q92796(DLG3);Q13126(MTAP);O95340(PAPSS2);P55263(ADK);P36959(GMPR);Q16854(DGUOK);P22234(PAICS);Q9Y3D8(AK6);Q86TP1(PRUNE1);P36871(PGM1);Q9H857(NT5DC2);Q13822(ENPP2);Q06210(GFPT1);Q9P2T1(GMPR2)…	Q8N4P3(HDDC3);Q6UWV6(ENPP7);Q13822(ENPP2);P27707(DCK);P17342(NPR3);Q9Y2T3(GDA);Q96DE0(NUDT16);Q02153(GUCY1B1);P22413(ENPP1);Q8WUY3(PRUNE2);Q9H477(RBKS)
2'-Deoxyinosine	253.093	3.26237	C05512	1.60465	1.2244	0.00221833	map01100	Q8NCL4(GALNT6);Q96I99(SUCLG2);Q99943(AGPAT1);P23526(AHCY);P30613(PKLR);Q96N66(MBOAT7);P00167(CYB5A);Q9NSC7(ST6GALNAC1);Q15274(QPRT);P08574(CYC1);Q13884(SNTB1);P20936(RASA1);Q8N0U8(VKORC1L1);Q13057(COASY);Q8TB45(DEPTOR);P00558(PGK1);Q9P2T1(GMPR2);Q00722(PLCB2);P22392(NME2);Q9NZL9(MAT2B);P04075(ALDOA);Q13724(MOGS);Q9NQ88(TIGAR);Q96LJ7(DHRS1);P13995(MTHFD2);Q6UB35(MTHFD1L);Q14247(CTTN);Q01970(PLCB3)…	Q8NCL4(GALNT6);P30613(PKLR);Q9NSC7(ST6GALNAC1);P20936(RASA1);Q6UB35(MTHFD1L);P52209(PGD);Q7L5L3(GDPD3);P30043(BLVRB);Q9UBM7(DHCR7);Q53FA7(TP53I3);P32322(PYCR1);Q86YB7(ECHDC2);P08842(STS);Q9C0D9(SELENOI);Q96DC8(ECHDC3);O00763(ACACB);O60476(MAN1A2);P51178(PLCD1);Q9H7F0(ATP13A3);Q9NZC3(GDE1);P46439(GSTM5);Q9H788(SH2D4A);Q9H477(RBKS);P16435(POR);Q9UHK6(AMACR);Q02153(GUCY1B1);Q7Z5P4(HSD17B13);Q13011(E…
2'-Deoxyinosine	253.093	3.26237	C05512	1.60465	1.2244	0.00221833	map01232	Q01433(AMPD2);Q01432(AMPD3);Q9BSD7(NTPCR);Q8TCD5(NT5C);P12268(IMPDH2);Q9BY32(ITPA);Q7Z4H3(HDDC2);Q9H773(DCTPP1);Q6UWV6(ENPP7);Q7LG56(RRM2B);P55263(ADK);P36959(GMPR);Q16854(DGUOK);Q16831(UPP1);P27144(AK4);P32321(DCTD);Q9Y3D8(AK6);Q9H857(NT5DC2);Q13822(ENPP2);Q9P2T1(GMPR2);P27707(DCK);P21589(NT5E);P20839(IMPDH1);O95671(ASMTL);Q06278(AOX1);P07741(APRT);Q16774(GUK1);P23919(DTYMK);P30566(ADSL);P49915(…	Q6UWV6(ENPP7);Q13822(ENPP2);P27707(DCK);P22413(ENPP1);P04183(TK1);Q9Y2T3(GDA);Q96DE0(NUDT16);Q9H477(RBKS);P32320(CDA);Q5EBM0(CMPK2)
2'-Deoxyinosine	253.093	3.26237	C05512	1.60465	1.2244	0.00221833	map02010	P33897(ABCD1);O14678(ABCD4);Q9NUQ8(ABCF3);Q9NUT2(ABCB8);Q9NP58(ABCB6);P61221(ABCE1);Q8N139(ABCA6);P08183(ABCB1);O94911(ABCA8);O95342(ABCB11);P28288(ABCD3);Q9NRK6(ABCB10);P33527(ABCC1);Q9UG63(ABCF2);Q8NE71(ABCF1);O95477(ABCA1);O15438(ABCC3);Q03518(TAP1);Q03519(TAP2)	P08183(ABCB1);O94911(ABCA8);O95342(ABCB11);P33527(ABCC1)
N1-(5-phospho-d-ribosyl)-amp	558.064	0.911067	C02741	2.23661	0.758521	0.00159395	map00340	P21397(MAOA);Q9H2A2(ALDH8A1);P51648(ALDH3A2);P51649(ALDH5A1);Q16853(AOC3);P47895(ALDH1A3);P30038(ALDH4A1);Q8IZ83(ALDH16A1);P00352(ALDH1A1);O94788(ALDH1A2);P43353(ALDH3B1);P49189(ALDH9A1);P27338(MAOB);P30837(ALDH1B1);O60341(KDM1A);Q02252(ALDH6A1);Q96HD9(ACY3);Q6P996(PDXDC1);P19801(AOC1);Q96KP4(CNDP2);P05091(ALDH2);P49419(ALDH7A1);Q96RQ9(IL4I1);P50135(HNMT);Q3SY69(ALDH1L2)	Q9H2A2(ALDH8A1);P51649(ALDH5A1);P30038(ALDH4A1);P00352(ALDH1A1);O94788(ALDH1A2);P27338(MAOB);P19801(AOC1);P05091(ALDH2)
N1-(5-phospho-d-ribosyl)-amp	558.064	0.911067	C02741	2.23661	0.758521	0.00159395	map01100	Q8NCL4(GALNT6);Q96I99(SUCLG2);Q99943(AGPAT1);P23526(AHCY);P30613(PKLR);Q96N66(MBOAT7);P00167(CYB5A);Q9NSC7(ST6GALNAC1);Q15274(QPRT);P08574(CYC1);Q13884(SNTB1);P20936(RASA1);Q8N0U8(VKORC1L1);Q13057(COASY);Q8TB45(DEPTOR);P00558(PGK1);Q9P2T1(GMPR2);Q00722(PLCB2);P22392(NME2);Q9NZL9(MAT2B);P04075(ALDOA);Q13724(MOGS);Q9NQ88(TIGAR);Q96LJ7(DHRS1);P13995(MTHFD2);Q6UB35(MTHFD1L);Q14247(CTTN);Q01970(PLCB3)…	Q8NCL4(GALNT6);P30613(PKLR);Q9NSC7(ST6GALNAC1);P20936(RASA1);Q6UB35(MTHFD1L);P52209(PGD);Q7L5L3(GDPD3);P30043(BLVRB);Q9UBM7(DHCR7);Q53FA7(TP53I3);P32322(PYCR1);Q86YB7(ECHDC2);P08842(STS);Q9C0D9(SELENOI);Q96DC8(ECHDC3);O00763(ACACB);O60476(MAN1A2);P51178(PLCD1);Q9H7F0(ATP13A3);Q9NZC3(GDE1);P46439(GSTM5);Q9H788(SH2D4A);Q9H477(RBKS);P16435(POR);Q9UHK6(AMACR);Q02153(GUCY1B1);Q7Z5P4(HSD17B13);Q13011(E…
N1-(5-phospho-d-ribosyl)-amp	558.064	0.911067	C02741	2.23661	0.758521	0.00159395	map01230	P32929(CTH);Q96GA7(SDSL);P04406(GAPDH);P05165(PCCA);O15382(BCAT2);Q03154(ACY1);P34896(SHMT1);P34897(SHMT2);P21399(ACO1);P31153(MAT2A);P78540(ARG2);P06733(ENO1);P31327(CPS1);Q99707(MTR);P37837(TALDO1);P18669(PGAM1);P00966(ASS1);Q53H96(PYCR3);O75874(IDH1);P08243(ASNS);P05089(ARG1);P60174(TPI1);O00763(ACACB);P14618(PKM);P49247(RPIA);P15104(GLUL);P04075(ALDOA);Q9GZT4(SRR);P04424(ASL);P00558(PGK1);P54…	P32929(CTH);Q96GA7(SDSL);P08243(ASNS);O00763(ACACB);P15104(GLUL);Q9GZT4(SRR);P54886(ALDH18A1);O43175(PHGDH);P30613(PKLR);P48735(IDH2);P32322(PYCR1)
Thymidine glycol	297.07	0.911067	-	1.76654	1.27733	0.0150161
PA(20:5(5Z,8Z,11Z,14Z,17Z)/14:0)	667.438	6.45675	C00416	2.38651	0.769929	0.00354417	map00561	Q9UKY3(CES1P1);Q7L5N7(LPCAT2);Q99943(AGPAT1);Q9H2A2(ALDH8A1);Q9NRZ7(AGPAT3);Q96N66(MBOAT7);P23141(CES1);P51648(ALDH3A2);P51649(ALDH5A1);Q8N0W4(NLGN4X);P47895(ALDH1A3);P15121(AKR1B1);P30038(ALDH4A1);P38571(LIPA);Q8IZ83(ALDH16A1);O14494(PLPP1);P00352(ALDH1A1);O94788(ALDH1A2);Q53H12(AGK);P43353(ALDH3B1);P49189(ALDH9A1);Q3LXA3(TKFC);O95870(ABHD16A);P17516(AKR1C4);P30837(ALDH1B1);P61601(NCALD);P14550(…	Q9UKY3(CES1P1);Q9H2A2(ALDH8A1);P51649(ALDH5A1);P30038(ALDH4A1);P00352(ALDH1A1);O94788(ALDH1A2);P17516(AKR1C4);O75907(DGAT1);P05091(ALDH2);Q8WWY8(LIPH)
PA(20:5(5Z,8Z,11Z,14Z,17Z)/14:0)	667.438	6.45675	C00416	2.38651	0.769929	0.00354417	map00564	O14495(PLPP3);Q7L5N7(LPCAT2);P28329(CHAT);Q9NRZ7(AGPAT3);Q8IY17(PNPLA6);Q9C0D9(SELENOI);O14939(PLD2);Q96N66(MBOAT7);P23141(CES1);P80404(ABAT);Q8IV08(PLD3);O14735(CDIPT);Q3MJ16(PLA2G4E);Q99447(PCYT2);Q5VWZ2(LYPLAL1);Q99943(AGPAT1);P43155(CRAT);O95674(CDS2);Q8N335(GPD1L);Q99828(CIB1);P61601(NCALD);Q9Y6K0(CEPT1);Q13393(PLD1);Q6P1A2(LPCAT3);P14555(PLA2G2A);P63098(PPP3R1);Q9Y259(CHKB);Q9UKY3(CES1P1);Q…	Q9C0D9(SELENOI);P80404(ABAT);Q13393(PLD1);P14555(PLA2G2A);Q9UKY3(CES1P1);P50416(CPT1A);Q8WWY8(LIPH);Q8WUD6(CHPT1)
PA(20:5(5Z,8Z,11Z,14Z,17Z)/14:0)	667.438	6.45675	C00416	2.38651	0.769929	0.00354417	map01100	Q8NCL4(GALNT6);Q96I99(SUCLG2);Q99943(AGPAT1);P23526(AHCY);P30613(PKLR);Q96N66(MBOAT7);P00167(CYB5A);Q9NSC7(ST6GALNAC1);Q15274(QPRT);P08574(CYC1);Q13884(SNTB1);P20936(RASA1);Q8N0U8(VKORC1L1);Q13057(COASY);Q8TB45(DEPTOR);P00558(PGK1);Q9P2T1(GMPR2);Q00722(PLCB2);P22392(NME2);Q9NZL9(MAT2B);P04075(ALDOA);Q13724(MOGS);Q9NQ88(TIGAR);Q96LJ7(DHRS1);P13995(MTHFD2);Q6UB35(MTHFD1L);Q14247(CTTN);Q01970(PLCB3)…	Q8NCL4(GALNT6);P30613(PKLR);Q9NSC7(ST6GALNAC1);P20936(RASA1);Q6UB35(MTHFD1L);P52209(PGD);Q7L5L3(GDPD3);P30043(BLVRB);Q9UBM7(DHCR7);Q53FA7(TP53I3);P32322(PYCR1);Q86YB7(ECHDC2);P08842(STS);Q9C0D9(SELENOI);Q96DC8(ECHDC3);O00763(ACACB);O60476(MAN1A2);P51178(PLCD1);Q9H7F0(ATP13A3);Q9NZC3(GDE1);P46439(GSTM5);Q9H788(SH2D4A);Q9H477(RBKS);P16435(POR);Q9UHK6(AMACR);Q02153(GUCY1B1);Q7Z5P4(HSD17B13);Q13011(E…
PA(20:5(5Z,8Z,11Z,14Z,17Z)/14:0)	667.438	6.45675	C00416	2.38651	0.769929	0.00354417	map04024	Q9Y2H1(STK38L);P17535(JUND);P31749(AKT1);Q9NUT2(ABCB8);Q00722(PLCB2);Q9Y3L5(RAP2C);Q9Y4K4(MAP4K5);P19838(NFKB1);Q8N139(ABCA6);Q13523(PRPF4B);P46734(MAP2K3);Q15147(PLCB4);P09471(GNAO1);O14939(PLD2);O14936(CASK);Q8TB45(DEPTOR);O75185(ATP2C2);O75460(ERN1);Q03518(TAP1);Q03519(TAP2);P98194(ATP2C1);P98196(ATP11A);O14974(PPP1R12A);Q15382(RHEB);O15211(RGL2);O15438(ABCC3);Q15027(ACAP1);P08183(ABCB1);P4984…	O75185(ATP2C2);P08183(ABCB1);O60885(BRD4);Q8TDY4(ASAP3);Q03113(GNA12);Q05513(PRKCZ);O00168(FXYD1);P33527(ABCC1);Q8TD08(MAPK15);P17342(NPR3);P51178(PLCD1);Q9H7F0(ATP13A3);P15153(RAC2);Q5VV41(ARHGEF16);Q02153(GUCY1B1);O15084(ANKRD28);P22760(AADAC);Q13393(PLD1);O95342(ABCB11);A6NKQ9(CGB1);Q7LDG7(RASGRP2);P37023(ACVRL1);Q8WU79(SMAP2);Q9BXB1(LGR4);P19174(PLCG1);O14807(MRAS);O43293(DAPK3);Q9BQI0(AIF1L)…
PA(20:5(5Z,8Z,11Z,14Z,17Z)/14:0)	667.438	6.45675	C00416	2.38651	0.769929	0.00354417	map04070	Q99828(CIB1);Q9C0I1(MTMR12);P31749(AKT1);Q00722(PLCB2);Q68CZ2(TNS3);O14735(CDIPT);Q9HBL0(TNS1);Q15147(PLCB4);P20936(RASA1);Q9H8W4(PLEKHF2);Q8TB45(DEPTOR);P78527(PRKDC);P62993(GRB2);A1X283(SH3PXD2B);P61601(NCALD);Q96B97(SH3KBP1);Q14247(CTTN);Q01970(PLCB3);Q9NTJ5(SACM1L);Q9UJU6(DBNL);P51812(RPS6KA3);Q8NCE2(MTMR14);O75116(ROCK2);Q96T51(RUFY1);O15530(PDPK1);O95861(BPNT1);Q7Z3T8(ZFYVE16);P37235(HPCAL1…	Q9C0I1(MTMR12);P20936(RASA1);P51178(PLCD1);Q9H788(SH2D4A);Q15283(RASA2);Q9BT40(INPP5K);P49441(INPP1);Q05513(PRKCZ);P19174(PLCG1);Q9BQI0(AIF1L);P12829(MYL4);Q15111(PLCL1);O00750(PIK3C2B);Q86YQ8(CPNE8)
PA(20:5(5Z,8Z,11Z,14Z,17Z)/14:0)	667.438	6.45675	C00416	2.38651	0.769929	0.00354417	map04072	P18433(PTPRA);Q9Y2H5(PLEKHA6);P08069(IGF1R);Q00722(PLCB2);Q99828(CIB1);Q9Y3L5(RAP2C);Q96FE7(PIK3IP1);Q9NYV4(CDK12);P16333(NCK1);Q9NYL2(MAP3K20);P08575(PTPRC);Q15147(PLCB4);P20936(RASA1);O75886(STAM2);P31749(AKT1);P23469(PTPRE);Q8TD08(MAPK15);P84085(ARF5);Q6UXH9(PAMR1);Q9HAU0(PLEKHA5);P62993(GRB2);Q15382(RHEB);P18031(PTPN1);Q8NEB9(PIK3C3);Q15052(ARHGEF6);O00429(DNM1L);P16234(PDGFRA);P04070(PROC);P…	Q9Y2H5(PLEKHA6);Q96FE7(PIK3IP1);P20936(RASA1);Q8TD08(MAPK15);Q6UXH9(PAMR1);P37023(ACVRL1);O43739(CYTH3);P01780(IGHV3-7);P04626(ERBB2);O00750(PIK3C2B);Q12923(PTPN13);Q9Y572(RIPK3);P17948(FLT1);P51178(PLCD1);Q9H788(SH2D4A);P15153(RAC2);P00734(F2);Q02153(GUCY1B1);Q16825(PTPN21);Q13393(PLD1);P36897(TGFBR1);Q9NZH0(GPRC5B);Q05513(PRKCZ);P02775(PPBP);P19174(PLCG1);O14807(MRAS);Q15111(PLCL1);P01766(IGHV3…
PA(20:5(5Z,8Z,11Z,14Z,17Z)/14:0)	667.438	6.45675	C00416	2.38651	0.769929	0.00354417	map04666	P31749(AKT1);P08575(PTPRC);P20936(RASA1);P23469(PTPRE);P23468(PTPRD);P84085(ARF5);P18031(PTPN1);O14639(ABLIM1);Q05397(PTK2);Q14247(CTTN);Q01970(PLCB3);Q5VYY1(ANKRD22);P09471(GNAO1);Q00537(CDK17);Q00536(CDK16);O95425(SVIL);O00499(BIN1);Q8N8S7(ENAH);P53671(LIMK2);P63000(RAC1);P35749(MYH11);P16885(PLCG2);P04049(RAF1);P29966(MARCKS);B2RTY4(MYO9A);Q9BX66(SORBS1);O00401(WASL);P51178(PLCD1);P18085(ARF4)…	P20936(RASA1);P51178(PLCD1);Q9H788(SH2D4A);Q5VV41(ARHGEF16);P19174(PLCG1);P04626(ERBB2);A0A0B4J1V2(IGHV2-26);A0A0B4J1V6(IGHV3-73);Q86YQ8(CPNE8);P63261(ACTG1);Q13643(FHL3);P37023(ACVRL1);Q8WU79(SMAP2);P15153(RAC2);Q9BT40(INPP5K);Q16825(PTPN21);P36897(TGFBR1);P68133(ACTA1);P01766(IGHV3-13);Q9Y572(RIPK3);Q8N1I0(DOCK4);P10586(PTPRF);O94929(ABLIM3);Q9Y281(CFL2);Q05513(PRKCZ);Q9H7D0(DOCK5);Q6H8Q1(ABLIM…
PA(20:5(5Z,8Z,11Z,14Z,17Z)/14:0)	667.438	6.45675	C00416	2.38651	0.769929	0.00354417	map04912	Q9Y2H1(STK38L);P31749(AKT1);Q00722(PLCB2);Q9Y3L5(RAP2C);P61586(RHOA);Q92882(OSTF1);Q13523(PRPF4B);Q15147(PLCB4);P20936(RASA1);O14807(MRAS);O14936(CASK);P49137(MAPKAPK2);Q8TD08(MAPK15);P62993(GRB2);Q99683(MAP3K5);O60307(MAST3);P63096(GNAI1);P37023(ACVRL1);P43405(SYK);P43403(ZAP70);Q05397(PTK2);Q96RR4(CAMKK2);Q14247(CTTN);Q01970(PLCB3);Q14012(CAMK1);Q9NYV4(CDK12);Q13164(MAPK7);P09471(GNAO1);Q00537(…	P20936(RASA1);O14807(MRAS);Q8TD08(MAPK15);P37023(ACVRL1);Q9BQI0(AIF1L);P04004(VTN);Q03113(GNA12);P36897(TGFBR1);O43293(DAPK3);Q8TDX7(NEK7);P51178(PLCD1);P24941(CDK2);P22894(MMP8);P15153(RAC2);P51511(MMP15);P14780(MMP9);Q02153(GUCY1B1);Q13393(PLD1);A6NKQ9(CGB1);Q05513(PRKCZ);P02751(FN1);P19174(PLCG1);Q99986(VRK1);P12829(MYL4);Q15111(PLCL1);P29323(EPHB2);P01215(CGA);Q7LDG7(RASGRP2);P04626(ERBB2);Q1…
PA(20:5(5Z,8Z,11Z,14Z,17Z)/14:0)	667.438	6.45675	C00416	2.38651	0.769929	0.00354417	map04975	O94911(ABCA8);O15118(NPC1);Q99943(AGPAT1);Q9NP58(ABCB6);P09110(ACAA1);P02647(APOA1);P04114(APOB);Q8N0W4(NLGN4X);P55084(HADHB);Q4G176(ACSF3);Q03518(TAP1);O95477(ABCA1);P29373(CRABP2);Q5K4L6(SLC27A3);Q8WTV0(SCARB1);O14975(SLC27A2);P08183(ABCB1);Q6P1M0(SLC27A4);Q9NUT2(ABCB8);Q9NUB1(ACSS1);P42765(ACAA2);P24752(ACAT1);Q6PCB7(SLC27A1);P14555(PLA2G2A);Q9UKY3(CES1P1);O75907(DGAT1);P09455(RBP1);P23141(CES…	O94911(ABCA8);O14975(SLC27A2);P08183(ABCB1);Q9NUB1(ACSS1);P14555(PLA2G2A);Q9UKY3(CES1P1);O75907(DGAT1);P09455(RBP1);P16671(CD36);O95342(ABCB11);P05413(FABP3);Q8WWY8(LIPH)
PA(20:5(5Z,8Z,11Z,14Z,17Z)/14:0)	667.438	6.45675	C00416	2.38651	0.769929	0.00354417	map05200	Q02447(SP3);P50151(GNG10);P50150(GNG4);Q96FE7(PIK3IP1);P08572(COL4A2);P20936(RASA1);P31749(AKT1);O75610(LEFTY1);P23468(PTPRD);Q15269(PWP2);P16435(POR);P04070(PROC);Q05397(PTK2);P04278(SHBG);Q14247(CTTN);Q01970(PLCB3);Q8N392(ARHGAP18);Q01974(ROR2);Q00535(CDK5);Q00534(CDK6);Q00537(CDK17);P26232(CTNNA2);P15735(PHKG2);Q12931(TRAP1);P53671(LIMK2);P11233(RALA);Q99735(MGST2);P63000(RAC1);P11234(RALB);Q1…	Q96FE7(PIK3IP1);P08572(COL4A2);P20936(RASA1);P16435(POR);P49863(GZMK);Q9NQT8(KIF13B);Q8TDX7(NEK7);P51178(PLCD1);P11465(PSG2);P11169(SLC2A3);P46439(GSTM5);Q9H788(SH2D4A);Q5VV41(ARHGEF16);P01034(CST3);Q02153(GUCY1B1);A6NMZ7(COL6A6);Q13753(LAMC2);P51511(MMP15);O60760(HPGDS);Q9NPF0(CD320);P98160(HSPG2);O43240(KLK10);P12829(MYL4);P00750(PLAT);P04626(ERBB2);Q9UNX4(WDR3);Q8IUX8(EGFL6);Q14031(COL4A6);Q8W…
PA(20:5(5Z,8Z,11Z,14Z,17Z)/14:0)	667.438	6.45675	C00416	2.38651	0.769929	0.00354417	map05212	Q9Y2H1(STK38L);P31749(AKT1);P10398(ARAF);Q9Y3L5(RAP2C);Q96CV9(OPTN);Q92882(OSTF1);P10415(BCL2);O14939(PLD2);Q9Y6K9(IKBKG);P78527(PRKDC);Q13017(ARHGAP5);Q15382(RHEB);O60307(MAST3);P37023(ACVRL1);P43405(SYK);Q14155(ARHGEF7);Q96B97(SH3KBP1);Q15052(ARHGEF6);P08581(MET);Q8IUH4(ZDHHC13);Q8N392(ARHGAP18);P27361(MAPK3);Q15811(ITSN1);Q9Y3M8(STARD13);P49918(CDKN1C);Q13164(MAPK7);Q00535(CDK5);Q00534(CDK6);Q…	P37023(ACVRL1);P36897(TGFBR1);P42224(STAT1);Q8TD08(MAPK15);P15153(RAC2);P24941(CDK2);O15084(ANKRD28);Q13393(PLD1);Q05513(PRKCZ);O14807(MRAS);Q7LDG7(RASGRP2);O00750(PIK3C2B);P29122(PCSK6);P04626(ERBB2);Q07817(BCL2L1);P61812(TGFB2);P84022(SMAD3)
PA(20:5(5Z,8Z,11Z,14Z,17Z)/14:0)	667.438	6.45675	C00416	2.38651	0.769929	0.00354417	map05231	Q9Y2H1(STK38L);Q02447(SP3);O75751(SLC22A3);P31749(AKT1);Q00722(PLCB2);Q99828(CIB1);Q9Y3L5(RAP2C);Q92882(OSTF1);Q13523(PRPF4B);Q99447(PCYT2);Q5VWZ2(LYPLAL1);P20936(RASA1);Q8IWA5(SLC44A2);Q8TD08(MAPK15);P62993(GRB2);Q15382(RHEB);O15211(RGL2);P16234(PDGFRA);P61601(NCALD);P37023(ACVRL1);O00443(PIK3C2A);Q96B97(SH3KBP1);Q15052(ARHGEF6);Q14247(CTTN);Q01970(PLCB3);Q9NYV4(CDK12);Q13164(MAPK7);Q96FS4(SIPA1…	O75751(SLC22A3);P20936(RASA1);Q8TD08(MAPK15);P37023(ACVRL1);P51178(PLCD1);Q15111(PLCL1);O00750(PIK3C2B);P17948(FLT1);Q9H788(SH2D4A);P15153(RAC2);P11166(SLC2A1);Q13393(PLD1);P36897(TGFBR1);Q05513(PRKCZ);P19174(PLCG1);Q8WUD6(CHPT1);Q9NSA0(SLC22A11);O14807(MRAS);Q9C0D9(SELENOI);P11169(SLC2A3);Q7LDG7(RASGRP2);P04626(ERBB2);Q86YQ8(CPNE8);Q13542(EIF4EBP2);Q8WUF5(PPP1R13L)
3,4-Dimethylbenzenesulfonic acid	185.028	5.2392	-	1.99293	1.41152	0.000477423
Fructosyl-lysine	347.123	4.7894	C16488	1.88858	1.20552	0.00016619
Poricoic acid b	502.357	6.05455	-	2.20921	1.29254	0.0152552
6-Carboxy-5,6,7,8-tetrahydropterin	246.038	4.25158	C20239	1.77953	1.46804	0.00567179	map00790	Q9NQX3(GPHN);P16152(CBR1);O75911(DHRS3);P15121(AKR1B1);P61457(PCBD1);Q8NBN7(RDH13);P35270(SPR);Q92820(GGH);P05186(ALPL);Q7Z4W1(DCXR);Q9HBH5(RDH14);P17516(AKR1C4);P09417(QDPR);P14550(AKR1A1);Q9H0N5(PCBD2);O75828(CBR3);Q5VT66(MTARC1);P42330(AKR1C3);Q8TC12(RDH11);Q02338(BDH1);Q04828(AKR1C1);Q03393(PTS)	P61457(PCBD1);Q92820(GGH);P05186(ALPL);Q7Z4W1(DCXR);P17516(AKR1C4);Q03393(PTS)
6-Carboxy-5,6,7,8-tetrahydropterin	246.038	4.25158	C20239	1.77953	1.46804	0.00567179	map01100	Q8NCL4(GALNT6);Q96I99(SUCLG2);Q99943(AGPAT1);P23526(AHCY);P30613(PKLR);Q96N66(MBOAT7);P00167(CYB5A);Q9NSC7(ST6GALNAC1);Q15274(QPRT);P08574(CYC1);Q13884(SNTB1);P20936(RASA1);Q8N0U8(VKORC1L1);Q13057(COASY);Q8TB45(DEPTOR);P00558(PGK1);Q9P2T1(GMPR2);Q00722(PLCB2);P22392(NME2);Q9NZL9(MAT2B);P04075(ALDOA);Q13724(MOGS);Q9NQ88(TIGAR);Q96LJ7(DHRS1);P13995(MTHFD2);Q6UB35(MTHFD1L);Q14247(CTTN);Q01970(PLCB3)…	Q8NCL4(GALNT6);P30613(PKLR);Q9NSC7(ST6GALNAC1);P20936(RASA1);Q6UB35(MTHFD1L);P52209(PGD);Q7L5L3(GDPD3);P30043(BLVRB);Q9UBM7(DHCR7);Q53FA7(TP53I3);P32322(PYCR1);Q86YB7(ECHDC2);P08842(STS);Q9C0D9(SELENOI);Q96DC8(ECHDC3);O00763(ACACB);O60476(MAN1A2);P51178(PLCD1);Q9H7F0(ATP13A3);Q9NZC3(GDE1);P46439(GSTM5);Q9H788(SH2D4A);Q9H477(RBKS);P16435(POR);Q9UHK6(AMACR);Q02153(GUCY1B1);Q7Z5P4(HSD17B13);Q13011(E…
Estrone	315.133	6.01728	C02538	2.16459	1.30827	0.00161653	map00140	Q53GQ0(HSD17B12);P17516(AKR1C4);Q8N4T8(CBR4);Q8NBQ5(HSD17B11);O75911(DHRS3);P14550(AKR1A1);Q96SQ9(CYP2S1);P05108(CYP11A1);Q16850(CYP51A1);Q6IAN0(DHRS7B);P21964(COMT);Q9BPW9(DHRS9);P15121(AKR1B1);Q8NBN7(RDH13);O00338(SULT1C2);Q16698(DECR1);P51690(ARSL);O75828(CBR3);Q8IZV5(RDH10);P24557(TBXAS1);P15289(ARSA);Q7Z4W1(DCXR);Q9HBH5(RDH14);P50225(SULT1A1);Q16678(CYP1B1);Q96LJ7(DHRS1);Q06136(KDSR);Q86VU5(…	P17516(AKR1C4);Q8N4T8(CBR4);P05108(CYP11A1);Q9BPW9(DHRS9);P51690(ARSL);Q7Z4W1(DCXR);Q16678(CYP1B1);P08842(STS);P28845(HSD11B1);P14061(HSD17B1);Q7Z5P4(HSD17B13);P15428(HPGD);P14060(HSD3B1);P80365(HSD11B2);P11511(CYP19A1)
Estrone	315.133	6.01728	C02538	2.16459	1.30827	0.00161653	map01100	Q8NCL4(GALNT6);Q96I99(SUCLG2);Q99943(AGPAT1);P23526(AHCY);P30613(PKLR);Q96N66(MBOAT7);P00167(CYB5A);Q9NSC7(ST6GALNAC1);Q15274(QPRT);P08574(CYC1);Q13884(SNTB1);P20936(RASA1);Q8N0U8(VKORC1L1);Q13057(COASY);Q8TB45(DEPTOR);P00558(PGK1);Q9P2T1(GMPR2);Q00722(PLCB2);P22392(NME2);Q9NZL9(MAT2B);P04075(ALDOA);Q13724(MOGS);Q9NQ88(TIGAR);Q96LJ7(DHRS1);P13995(MTHFD2);Q6UB35(MTHFD1L);Q14247(CTTN);Q01970(PLCB3)…	Q8NCL4(GALNT6);P30613(PKLR);Q9NSC7(ST6GALNAC1);P20936(RASA1);Q6UB35(MTHFD1L);P52209(PGD);Q7L5L3(GDPD3);P30043(BLVRB);Q9UBM7(DHCR7);Q53FA7(TP53I3);P32322(PYCR1);Q86YB7(ECHDC2);P08842(STS);Q9C0D9(SELENOI);Q96DC8(ECHDC3);O00763(ACACB);O60476(MAN1A2);P51178(PLCD1);Q9H7F0(ATP13A3);Q9NZC3(GDE1);P46439(GSTM5);Q9H788(SH2D4A);Q9H477(RBKS);P16435(POR);Q9UHK6(AMACR);Q02153(GUCY1B1);Q7Z5P4(HSD17B13);Q13011(E…
Estrone	315.133	6.01728	C02538	2.16459	1.30827	0.00161653	map04976	Q9Y2H1(STK38L);O75751(SLC22A3);P31749(AKT1);Q9NUT2(ABCB8);Q92673(SORL1);P33527(ABCC1);O75185(ATP2C2);Q03518(TAP1);Q03519(TAP2);P98194(ATP2C1);P08183(ABCB1);Q6P1M0(SLC27A4);P50225(SULT1A1);P63096(GNAI1);P28702(RXRB);Q96RR4(CAMKK2);P09471(GNAO1);Q14344(GNA13);P51812(RPS6KA3);Q16647(PTGIS);O15438(ABCC3);O14920(IKBKB);P61221(ABCE1);O75110(ATP9A);P04920(SLC4A2);O75116(ROCK2);O15530(PDPK1);Q53FZ2(ACSM3…	O75751(SLC22A3);P33527(ABCC1);O75185(ATP2C2);P08183(ABCB1);P28702(RXRB);Q03113(GNA12);P55064(AQP5);Q92959(SLCO2A1);O00168(FXYD1);Q9H7F0(ATP13A3);Q02153(GUCY1B1);O94911(ABCA8);O14975(SLC27A2);O95342(ABCB11);Q05513(PRKCZ);P02730(SLC4A1);P07451(CA3);P00915(CA1);P11169(SLC2A3);P11166(SLC2A1);Q96BD0(SLCO4A1);Q96CM8(ACSF2);Q9NSA0(SLC22A11);P05108(CYP11A1);P22760(AADAC);P11511(CYP19A1)
S-Cysteinosuccinic acid	255.064	0.624317	-	1.57893	1.20782	0.0275492
Cytidine 3'-monophosphate	288.04	1.84693	C05822	2.88501	1.86532	0.000469112	map00240	Q8TCD5(NT5C);Q14194(CRMP1);P05165(PCCA);P15531(NME1);Q7Z4H3(HDDC2);Q9H773(DCTPP1);Q6UWV6(ENPP7);Q7LG56(RRM2B);Q16854(DGUOK);Q16831(UPP1);Q14195(DPYSL3);P31327(CPS1);P32321(DCTD);Q9H857(NT5DC2);Q13822(ENPP2);P27707(DCK);P21589(NT5E);Q13232(NME3);P27708(CAD);P04183(TK1);P11172(UMPS);P23919(DTYMK);Q9NWZ5(UCKL1);P30085(CMPK1);P54819(AK2);P33316(DUT);P27144(AK4);Q86UY8(NT5DC3);P19971(TYMP);Q12882(DPYD…	Q14194(CRMP1);Q6UWV6(ENPP7);Q13822(ENPP2);P27707(DCK);P04183(TK1);O14531(DPYSL4);O00763(ACACB);P32320(CDA);P22413(ENPP1);Q16555(DPYSL2);Q5EBM0(CMPK2)
Cytidine 3'-monophosphate	288.04	1.84693	C05822	2.88501	1.86532	0.000469112	map01100	Q8NCL4(GALNT6);Q96I99(SUCLG2);Q99943(AGPAT1);P23526(AHCY);P30613(PKLR);Q96N66(MBOAT7);P00167(CYB5A);Q9NSC7(ST6GALNAC1);Q15274(QPRT);P08574(CYC1);Q13884(SNTB1);P20936(RASA1);Q8N0U8(VKORC1L1);Q13057(COASY);Q8TB45(DEPTOR);P00558(PGK1);Q9P2T1(GMPR2);Q00722(PLCB2);P22392(NME2);Q9NZL9(MAT2B);P04075(ALDOA);Q13724(MOGS);Q9NQ88(TIGAR);Q96LJ7(DHRS1);P13995(MTHFD2);Q6UB35(MTHFD1L);Q14247(CTTN);Q01970(PLCB3)…	Q8NCL4(GALNT6);P30613(PKLR);Q9NSC7(ST6GALNAC1);P20936(RASA1);Q6UB35(MTHFD1L);P52209(PGD);Q7L5L3(GDPD3);P30043(BLVRB);Q9UBM7(DHCR7);Q53FA7(TP53I3);P32322(PYCR1);Q86YB7(ECHDC2);P08842(STS);Q9C0D9(SELENOI);Q96DC8(ECHDC3);O00763(ACACB);O60476(MAN1A2);P51178(PLCD1);Q9H7F0(ATP13A3);Q9NZC3(GDE1);P46439(GSTM5);Q9H788(SH2D4A);Q9H477(RBKS);P16435(POR);Q9UHK6(AMACR);Q02153(GUCY1B1);Q7Z5P4(HSD17B13);Q13011(E…
7,4'-Dihydroxy-8-methylflavan	277.086	2.6028	C09650	1.96203	1.28119	0.00685968
Hippuric acid	180.065	4.25022	C01586	1.72501	1.31153	0.0475005	map01100	Q8NCL4(GALNT6);Q96I99(SUCLG2);Q99943(AGPAT1);P23526(AHCY);P30613(PKLR);Q96N66(MBOAT7);P00167(CYB5A);Q9NSC7(ST6GALNAC1);Q15274(QPRT);P08574(CYC1);Q13884(SNTB1);P20936(RASA1);Q8N0U8(VKORC1L1);Q13057(COASY);Q8TB45(DEPTOR);P00558(PGK1);Q9P2T1(GMPR2);Q00722(PLCB2);P22392(NME2);Q9NZL9(MAT2B);P04075(ALDOA);Q13724(MOGS);Q9NQ88(TIGAR);Q96LJ7(DHRS1);P13995(MTHFD2);Q6UB35(MTHFD1L);Q14247(CTTN);Q01970(PLCB3)…	Q8NCL4(GALNT6);P30613(PKLR);Q9NSC7(ST6GALNAC1);P20936(RASA1);Q6UB35(MTHFD1L);P52209(PGD);Q7L5L3(GDPD3);P30043(BLVRB);Q9UBM7(DHCR7);Q53FA7(TP53I3);P32322(PYCR1);Q86YB7(ECHDC2);P08842(STS);Q9C0D9(SELENOI);Q96DC8(ECHDC3);O00763(ACACB);O60476(MAN1A2);P51178(PLCD1);Q9H7F0(ATP13A3);Q9NZC3(GDE1);P46439(GSTM5);Q9H788(SH2D4A);Q9H477(RBKS);P16435(POR);Q9UHK6(AMACR);Q02153(GUCY1B1);Q7Z5P4(HSD17B13);Q13011(E…
Isoetharine	272.185	4.61348	C07053	1.76245	1.27745	0.0306326
4-Amino-1-[(1S,2S,4S)-4,5-bis(hydroxymethyl)-2-bicyclo[3.1.0]hexanyl]pyrimidin-2-one	286.094	5.89773	-	1.7605	1.31429	0.00604518
Hydroxygaleon	363.12	4.52758	-	1.89137	1.2382	0.00056082
Sedoheptulose 1,7-bisphosphate	353.003	0.73065	C00447	1.72211	1.24326	0.0206339	map01100	Q8NCL4(GALNT6);Q96I99(SUCLG2);Q99943(AGPAT1);P23526(AHCY);P30613(PKLR);Q96N66(MBOAT7);P00167(CYB5A);Q9NSC7(ST6GALNAC1);Q15274(QPRT);P08574(CYC1);Q13884(SNTB1);P20936(RASA1);Q8N0U8(VKORC1L1);Q13057(COASY);Q8TB45(DEPTOR);P00558(PGK1);Q9P2T1(GMPR2);Q00722(PLCB2);P22392(NME2);Q9NZL9(MAT2B);P04075(ALDOA);Q13724(MOGS);Q9NQ88(TIGAR);Q96LJ7(DHRS1);P13995(MTHFD2);Q6UB35(MTHFD1L);Q14247(CTTN);Q01970(PLCB3)…	Q8NCL4(GALNT6);P30613(PKLR);Q9NSC7(ST6GALNAC1);P20936(RASA1);Q6UB35(MTHFD1L);P52209(PGD);Q7L5L3(GDPD3);P30043(BLVRB);Q9UBM7(DHCR7);Q53FA7(TP53I3);P32322(PYCR1);Q86YB7(ECHDC2);P08842(STS);Q9C0D9(SELENOI);Q96DC8(ECHDC3);O00763(ACACB);O60476(MAN1A2);P51178(PLCD1);Q9H7F0(ATP13A3);Q9NZC3(GDE1);P46439(GSTM5);Q9H788(SH2D4A);Q9H477(RBKS);P16435(POR);Q9UHK6(AMACR);Q02153(GUCY1B1);Q7Z5P4(HSD17B13);Q13011(E…
Sedoheptulose 1,7-bisphosphate	353.003	0.73065	C00447	1.72211	1.24326	0.0206339	map01200	Q96I99(SUCLG2);P40939(HADHA);P05166(PCCB);Q9GZT4(SRR);P09110(ACAA1);P12694(BCKDHA);P48735(IDH2);P14618(PKM);P49247(RPIA);P27708(CAD);Q9H2A2(ALDH8A1);Q2TB90(HKDC1);Q9NTX5(ECHDC1);Q9NNW7(TXNRD2);Q00796(SORD);P51553(IDH3G);P52209(PGD);P24752(ACAT1);P00390(GSR);P05165(PCCA);P10768(ESD);Q9H008(LHPP);P40926(MDH2);Q8TD30(GPT2);P60891(PRPS1);Q9H6R3(ACSS3);Q13363(CTBP1);Q08426(EHHADH);P48728(AMT);Q14558(P…	Q9GZT4(SRR);P48735(IDH2);Q9H2A2(ALDH8A1);P52209(PGD);Q86YB7(ECHDC2);Q9H0R4(HDHD2);Q96GA7(SDSL);Q96DC8(ECHDC3);O00763(ACACB);Q13825(AUH);Q96PE7(MCEE);P49448(GLUD2);P30613(PKLR);P23434(GCSH);P05091(ALDH2);Q13011(ECH1);O43175(PHGDH);P00325(ADH1B);P48163(ME1);Q96CM8(ACSF2);P51649(ALDH5A1);P00352(ALDH1A1);O94788(ALDH1A2);Q9NUB1(ACSS1);P23378(GLDC)
Antipyrine	187.088	5.92432	C13244	2.70526	1.60624	0.000419753
Phosphoenolpyruvic Acid	334.957	0.76705	C00074	2.37861	1.41533	0.012467	map00010	Q53FZ2(ACSM3);Q4G176(ACSF3);P04406(GAPDH);Q9H2A2(ALDH8A1);P10515(DLAT);Q96CM8(ACSF2);P14550(AKR1A1);P51648(ALDH3A2);P51649(ALDH5A1);Q9UNW1(MINPP1);P06733(ENO1);P19367(HK1);P47895(ALDH1A3);P18669(PGAM1);P00558(PGK1);P30038(ALDH4A1);P08559(PDHA1);P36957(DLST);Q8IZ83(ALDH16A1);P52790(HK3);P29401(TKT);P36871(PGM1);P00352(ALDH1A1);O94788(ALDH1A2);P09622(DLD);P60174(TPI1);P00390(GSR);P14618(PKM);P43353…	Q9H2A2(ALDH8A1);Q96CM8(ACSF2);P51649(ALDH5A1);P30038(ALDH4A1);P00352(ALDH1A1);O94788(ALDH1A2);P30613(PKLR);Q9NUB1(ACSS1);P17516(AKR1C4);P00325(ADH1B);P05091(ALDH2)
Phosphoenolpyruvic Acid	334.957	0.76705	C00074	2.37861	1.41533	0.012467	map00020	Q96I99(SUCLG2);Q99643(SDHC);P21953(BCKDHB);P05165(PCCA);P21399(ACO1);O14521(SDHD);O00330(PDHX);P08559(PDHA1);P36957(DLST);P09622(DLD);O43837(IDH3B);P48735(IDH2);Q96HY7(DHTKD1);P10515(DLAT);P12694(BCKDHA);Q9NNW7(TXNRD2);P11177(PDHB);P51553(IDH3G);Q9P2R7(SUCLA2);P31040(SDHA);Q99798(ACO2);P29401(TKT);P00390(GSR);O75390(CS);P40925(MDH1);P40926(MDH2);P07954(FH);O00763(ACACB);P11182(DBT);Q02218(OGDH);P…	P48735(IDH2);O00763(ACACB)
Phosphoenolpyruvic Acid	334.957	0.76705	C00074	2.37861	1.41533	0.012467	map00400	P21397(MAOA);P17174(GOT1);Q6YP21(KYAT3);P27338(MAOB);P00505(GOT2);Q8TD30(GPT2);Q96RQ9(IL4I1);Q16773(KYAT1);O60341(KDM1A)	Q6YP21(KYAT3);P27338(MAOB)
Phosphoenolpyruvic Acid	334.957	0.76705	C00074	2.37861	1.41533	0.012467	map00440	P49585(PCYT1A);Q9C0D9(SELENOI);Q9Y6K0(CEPT1);Q8WUD6(CHPT1);Q9Y5K3(PCYT1B);Q99447(PCYT2)	Q9C0D9(SELENOI);Q8WUD6(CHPT1)
Phosphoenolpyruvic Acid	334.957	0.76705	C00074	2.37861	1.41533	0.012467	map00620	Q8N490(PNKD);P05166(PCCB);P30613(PKLR);P09110(ACAA1);P12694(BCKDHA);P14618(PKM);P27708(CAD);Q9H2A2(ALDH8A1);Q6P1M0(SLC27A4);Q16775(HAGH);Q9NNW7(TXNRD2);Q00796(SORD);P24752(ACAT1);P00390(GSR);P05165(PCCA);P40925(MDH1);P40926(MDH2);O00154(ACOT7);P15121(AKR1B1);Q9H6R3(ACSS3);Q13363(CTBP1);Q99536(VAT1);Q53FZ2(ACSM3);Q16881(TXNRD1);P47895(ALDH1A3);Q86V21(AACS);P08559(PDHA1);Q16798(ME3);O00763(ACACB);P…	P30613(PKLR);Q9H2A2(ALDH8A1);Q16775(HAGH);O00763(ACACB);Q9NUB1(ACSS1);P14621(ACYP2);P05091(ALDH2);O43175(PHGDH);P17516(AKR1C4);P00325(ADH1B);P48163(ME1);Q96CM8(ACSF2);P51649(ALDH5A1);P30038(ALDH4A1);P00352(ALDH1A1);O94788(ALDH1A2)
Phosphoenolpyruvic Acid	334.957	0.76705	C00074	2.37861	1.41533	0.012467	map01100	Q8NCL4(GALNT6);Q96I99(SUCLG2);Q99943(AGPAT1);P23526(AHCY);P30613(PKLR);Q96N66(MBOAT7);P00167(CYB5A);Q9NSC7(ST6GALNAC1);Q15274(QPRT);P08574(CYC1);Q13884(SNTB1);P20936(RASA1);Q8N0U8(VKORC1L1);Q13057(COASY);Q8TB45(DEPTOR);P00558(PGK1);Q9P2T1(GMPR2);Q00722(PLCB2);P22392(NME2);Q9NZL9(MAT2B);P04075(ALDOA);Q13724(MOGS);Q9NQ88(TIGAR);Q96LJ7(DHRS1);P13995(MTHFD2);Q6UB35(MTHFD1L);Q14247(CTTN);Q01970(PLCB3)…	Q8NCL4(GALNT6);P30613(PKLR);Q9NSC7(ST6GALNAC1);P20936(RASA1);Q6UB35(MTHFD1L);P52209(PGD);Q7L5L3(GDPD3);P30043(BLVRB);Q9UBM7(DHCR7);Q53FA7(TP53I3);P32322(PYCR1);Q86YB7(ECHDC2);P08842(STS);Q9C0D9(SELENOI);Q96DC8(ECHDC3);O00763(ACACB);O60476(MAN1A2);P51178(PLCD1);Q9H7F0(ATP13A3);Q9NZC3(GDE1);P46439(GSTM5);Q9H788(SH2D4A);Q9H477(RBKS);P16435(POR);Q9UHK6(AMACR);Q02153(GUCY1B1);Q7Z5P4(HSD17B13);Q13011(E…
Phosphoenolpyruvic Acid	334.957	0.76705	C00074	2.37861	1.41533	0.012467	map01200	Q96I99(SUCLG2);P40939(HADHA);P05166(PCCB);Q9GZT4(SRR);P09110(ACAA1);P12694(BCKDHA);P48735(IDH2);P14618(PKM);P49247(RPIA);P27708(CAD);Q9H2A2(ALDH8A1);Q2TB90(HKDC1);Q9NTX5(ECHDC1);Q9NNW7(TXNRD2);Q00796(SORD);P51553(IDH3G);P52209(PGD);P24752(ACAT1);P00390(GSR);P05165(PCCA);P10768(ESD);Q9H008(LHPP);P40926(MDH2);Q8TD30(GPT2);P60891(PRPS1);Q9H6R3(ACSS3);Q13363(CTBP1);Q08426(EHHADH);P48728(AMT);Q14558(P…	Q9GZT4(SRR);P48735(IDH2);Q9H2A2(ALDH8A1);P52209(PGD);Q86YB7(ECHDC2);Q9H0R4(HDHD2);Q96GA7(SDSL);Q96DC8(ECHDC3);O00763(ACACB);Q13825(AUH);Q96PE7(MCEE);P49448(GLUD2);P30613(PKLR);P23434(GCSH);P05091(ALDH2);Q13011(ECH1);O43175(PHGDH);P00325(ADH1B);P48163(ME1);Q96CM8(ACSF2);P51649(ALDH5A1);P00352(ALDH1A1);O94788(ALDH1A2);Q9NUB1(ACSS1);P23378(GLDC)
Phosphoenolpyruvic Acid	334.957	0.76705	C00074	2.37861	1.41533	0.012467	map01230	P32929(CTH);Q96GA7(SDSL);P04406(GAPDH);P05165(PCCA);O15382(BCAT2);Q03154(ACY1);P34896(SHMT1);P34897(SHMT2);P21399(ACO1);P31153(MAT2A);P78540(ARG2);P06733(ENO1);P31327(CPS1);Q99707(MTR);P37837(TALDO1);P18669(PGAM1);P00966(ASS1);Q53H96(PYCR3);O75874(IDH1);P08243(ASNS);P05089(ARG1);P60174(TPI1);O00763(ACACB);P14618(PKM);P49247(RPIA);P15104(GLUL);P04075(ALDOA);Q9GZT4(SRR);P04424(ASL);P00558(PGK1);P54…	P32929(CTH);Q96GA7(SDSL);P08243(ASNS);O00763(ACACB);P15104(GLUL);Q9GZT4(SRR);P54886(ALDH18A1);O43175(PHGDH);P30613(PKLR);P48735(IDH2);P32322(PYCR1)
Phosphoenolpyruvic Acid	334.957	0.76705	C00074	2.37861	1.41533	0.012467	map01240	P23381(WARS1);P05165(PCCA);O75911(DHRS3);Q15274(QPRT);P49327(FASN);Q96I15(SCLY);Q8N0U8(VKORC1L1);Q13057(COASY);Q9Y3D8(AK6);Q9Y5P6(GMPPB);P30038(ALDH4A1);Q6XQN6(NAPRT);Q02127(DHODH);P22392(NME2);Q9NZL9(MAT2B);P27708(CAD);Q9H2A2(ALDH8A1);P15559(NQO1);Q96LJ7(DHRS1);P13995(MTHFD2);Q6UB35(MTHFD1L);Q3SXM5(HSDL1);O15270(SPTLC2);Q9BZ23(PANK2);P56937(HSD17B7);P00390(GSR);Q9H008(LHPP);Q6YN16(HSDL2);Q6IA69(…	P30038(ALDH4A1);Q9H2A2(ALDH8A1);Q6UB35(MTHFD1L);Q8N4T8(CBR4);Q9NVS9(PNPO);Q92820(GGH);O00763(ACACB);Q9BPW9(DHRS9);O14531(DPYSL4);P28845(HSD11B1);P05091(ALDH2);Q7Z5P4(HSD17B13);P17516(AKR1C4);P36551(CPOX);P13716(ALAD);P38435(GGCX);P15428(HPGD);P80365(HSD11B2);Q5EBM0(CMPK2);Q03393(PTS);P51649(ALDH5A1);P00352(ALDH1A1);O94788(ALDH1A2);P05186(ALPL);Q96EY8(MMAB);P14061(HSD17B1);Q7Z4W1(DCXR)
Phosphoenolpyruvic Acid	334.957	0.76705	C00074	2.37861	1.41533	0.012467	map04922	Q9Y2H1(STK38L);Q99828(CIB1);Q9Y478(PRKAB1);P31749(AKT1);Q00722(PLCB2);P30613(PKLR);Q14651(PLS1);P98177(FOXO4);Q15147(PLCB4);O14936(CASK);P05166(PCCB);O75460(ERN1);Q14643(ITPR1);P62140(PPP1CB);P14618(PKM);P27708(CAD);P05165(PCCA);P61601(NCALD);Q96RR4(CAMKK2);Q01970(PLCB3);Q14012(CAMK1);P63098(PPP3R1);Q01813(PFKP);P09471(GNAO1);Q15746(MYLK);P50416(CPT1A);P51812(RPS6KA3);P54619(PRKAG1);Q9NXA8(SIRT5)…	P30613(PKLR);P50416(CPT1A);Q03113(GNA12);O43293(DAPK3);O00763(ACACB);Q6UUV9(CRTC1);P51178(PLCD1);Q05513(PRKCZ);O60885(BRD4);Q86X55(CARM1);P48454(PPP3CC);Q9BQI0(AIF1L);P12829(MYL4);Q15111(PLCL1);P11169(SLC2A3);P11166(SLC2A1);Q02153(GUCY1B1);P19174(PLCG1);Q13555(CAMK2G)
Phosphoenolpyruvic Acid	334.957	0.76705	C00074	2.37861	1.41533	0.012467	map04964	Q9HBR0(SLC38A10);P19634(SLC9A1);P53007(SLC25A1);P05023(ATP1A1);P05026(ATP1B1);P00915(CA1);O00168(FXYD1);Q9HD20(ATP13A1);P54709(ATP1B3);Q9Y2Q0(ATP8A1);O75185(ATP2C2);Q9Y6M7(SLC4A7);P98194(ATP2C1);Q9NTI2(ATP8A2);Q3KQZ1(SLC25A35);P23634(ATP2B4);Q9H7F0(ATP13A3);O94925(GLS);P02730(SLC4A1);P49448(GLUD2);P40925(MDH1);O43570(CA12);O75110(ATP9A);P00918(CA2);P04920(SLC4A2);P07451(CA3);Q9UBX3(SLC25A10);Q168…	P00915(CA1);O00168(FXYD1);O75185(ATP2C2);Q9H7F0(ATP13A3);P02730(SLC4A1);P49448(GLUD2);P07451(CA3);P55064(AQP5)
Phosphoenolpyruvic Acid	334.957	0.76705	C00074	2.37861	1.41533	0.012467	map05230	P31749(AKT1);P08069(IGF1R);P30613(PKLR);Q9Y3L5(RAP2C);Q68CZ2(TNS3);P51805(PLXNA3);Q9HBL0(TNS1);P78527(PRKDC);Q16270(IGFBP7);P48735(IDH2);Q15382(RHEB);P16234(PDGFRA);Q9NQ88(TIGAR);P37023(ACVRL1);P43405(SYK);P08581(MET);O75880(SCO1);Q01974(ROR2);Q9NYV4(CDK12);P29401(TKT);Q13164(MAPK7);Q00534(CDK6);Q00537(CDK17);Q00536(CDK16);P60953(CDC42);P51812(RPS6KA3);Q9NXA8(SIRT5);P61225(RAP2B);P61224(RAP1B);P8…	P30613(PKLR);P48735(IDH2);P37023(ACVRL1);P36897(TGFBR1);O15427(SLC16A3);P52569(SLC7A2);P17948(FLT1);P29122(PCSK6);Q05513(PRKCZ);O14807(MRAS);O00750(PIK3C2B);P11169(SLC2A3);P11166(SLC2A1);P04626(ERBB2);Q8TD08(MAPK15);Q15120(PDK3);Q01650(SLC7A5)
MG(22:1(13Z)/0:0/0:0)	457.324	6.0599	-	1.92878	1.22554	0.0346657
Beta-D-Fructose 2-phosphate	296.98	4.36948	C03267	1.42107	1.2539	0.0237775	map00051	Q9NR50(EIF2B3);P19367(HK1);Q8N0W3(FCSK);P15121(AKR1B1);O60825(PFKFB2);P52790(HK3);Q9Y5P6(GMPPB);O14772(FPGT);P60174(TPI1);P34949(MPI);P04075(ALDOA);P17516(AKR1C4);Q9NQ88(TIGAR);Q2TB90(HKDC1);Q08257(CRYZ);Q01813(PFKP);Q00796(SORD);P14550(AKR1A1);Q96IJ6(GMPPA);P08237(PFKM);P42330(AKR1C3);P11766(ADH5);O60547(GMDS);P52789(HK2);P00325(ADH1B);Q04828(AKR1C1);Q7L5Y1(ENOSF1);Q13630(GFUS);P09467(FBP1);P077…	P17516(AKR1C4);P00325(ADH1B)
Beta-D-Fructose 2-phosphate	296.98	4.36948	C03267	1.42107	1.2539	0.0237775	map01100	Q8NCL4(GALNT6);Q96I99(SUCLG2);Q99943(AGPAT1);P23526(AHCY);P30613(PKLR);Q96N66(MBOAT7);P00167(CYB5A);Q9NSC7(ST6GALNAC1);Q15274(QPRT);P08574(CYC1);Q13884(SNTB1);P20936(RASA1);Q8N0U8(VKORC1L1);Q13057(COASY);Q8TB45(DEPTOR);P00558(PGK1);Q9P2T1(GMPR2);Q00722(PLCB2);P22392(NME2);Q9NZL9(MAT2B);P04075(ALDOA);Q13724(MOGS);Q9NQ88(TIGAR);Q96LJ7(DHRS1);P13995(MTHFD2);Q6UB35(MTHFD1L);Q14247(CTTN);Q01970(PLCB3)…	Q8NCL4(GALNT6);P30613(PKLR);Q9NSC7(ST6GALNAC1);P20936(RASA1);Q6UB35(MTHFD1L);P52209(PGD);Q7L5L3(GDPD3);P30043(BLVRB);Q9UBM7(DHCR7);Q53FA7(TP53I3);P32322(PYCR1);Q86YB7(ECHDC2);P08842(STS);Q9C0D9(SELENOI);Q96DC8(ECHDC3);O00763(ACACB);O60476(MAN1A2);P51178(PLCD1);Q9H7F0(ATP13A3);Q9NZC3(GDE1);P46439(GSTM5);Q9H788(SH2D4A);Q9H477(RBKS);P16435(POR);Q9UHK6(AMACR);Q02153(GUCY1B1);Q7Z5P4(HSD17B13);Q13011(E…
5-Carboxypyranocyanidin 3-O-beta-glucopyranoside	554.047	1.32843	-	1.63472	1.20463	0.00222238
Amygdalin	478.129	5.89773	C08325	1.69567	1.24662	0.00728582	map01100	Q8NCL4(GALNT6);Q96I99(SUCLG2);Q99943(AGPAT1);P23526(AHCY);P30613(PKLR);Q96N66(MBOAT7);P00167(CYB5A);Q9NSC7(ST6GALNAC1);Q15274(QPRT);P08574(CYC1);Q13884(SNTB1);P20936(RASA1);Q8N0U8(VKORC1L1);Q13057(COASY);Q8TB45(DEPTOR);P00558(PGK1);Q9P2T1(GMPR2);Q00722(PLCB2);P22392(NME2);Q9NZL9(MAT2B);P04075(ALDOA);Q13724(MOGS);Q9NQ88(TIGAR);Q96LJ7(DHRS1);P13995(MTHFD2);Q6UB35(MTHFD1L);Q14247(CTTN);Q01970(PLCB3)…	Q8NCL4(GALNT6);P30613(PKLR);Q9NSC7(ST6GALNAC1);P20936(RASA1);Q6UB35(MTHFD1L);P52209(PGD);Q7L5L3(GDPD3);P30043(BLVRB);Q9UBM7(DHCR7);Q53FA7(TP53I3);P32322(PYCR1);Q86YB7(ECHDC2);P08842(STS);Q9C0D9(SELENOI);Q96DC8(ECHDC3);O00763(ACACB);O60476(MAN1A2);P51178(PLCD1);Q9H7F0(ATP13A3);Q9NZC3(GDE1);P46439(GSTM5);Q9H788(SH2D4A);Q9H477(RBKS);P16435(POR);Q9UHK6(AMACR);Q02153(GUCY1B1);Q7Z5P4(HSD17B13);Q13011(E…
PE(15:0/14:1(9Z))	711.464	6.45148	C00350	4.25232	0.241743	0.000112517	map00564	O14495(PLPP3);Q7L5N7(LPCAT2);P28329(CHAT);Q9NRZ7(AGPAT3);Q8IY17(PNPLA6);Q9C0D9(SELENOI);O14939(PLD2);Q96N66(MBOAT7);P23141(CES1);P80404(ABAT);Q8IV08(PLD3);O14735(CDIPT);Q3MJ16(PLA2G4E);Q99447(PCYT2);Q5VWZ2(LYPLAL1);Q99943(AGPAT1);P43155(CRAT);O95674(CDS2);Q8N335(GPD1L);Q99828(CIB1);P61601(NCALD);Q9Y6K0(CEPT1);Q13393(PLD1);Q6P1A2(LPCAT3);P14555(PLA2G2A);P63098(PPP3R1);Q9Y259(CHKB);Q9UKY3(CES1P1);Q…	Q9C0D9(SELENOI);P80404(ABAT);Q13393(PLD1);P14555(PLA2G2A);Q9UKY3(CES1P1);P50416(CPT1A);Q8WWY8(LIPH);Q8WUD6(CHPT1)
PE(15:0/14:1(9Z))	711.464	6.45148	C00350	4.25232	0.241743	0.000112517	map01100	Q8NCL4(GALNT6);Q96I99(SUCLG2);Q99943(AGPAT1);P23526(AHCY);P30613(PKLR);Q96N66(MBOAT7);P00167(CYB5A);Q9NSC7(ST6GALNAC1);Q15274(QPRT);P08574(CYC1);Q13884(SNTB1);P20936(RASA1);Q8N0U8(VKORC1L1);Q13057(COASY);Q8TB45(DEPTOR);P00558(PGK1);Q9P2T1(GMPR2);Q00722(PLCB2);P22392(NME2);Q9NZL9(MAT2B);P04075(ALDOA);Q13724(MOGS);Q9NQ88(TIGAR);Q96LJ7(DHRS1);P13995(MTHFD2);Q6UB35(MTHFD1L);Q14247(CTTN);Q01970(PLCB3)…	Q8NCL4(GALNT6);P30613(PKLR);Q9NSC7(ST6GALNAC1);P20936(RASA1);Q6UB35(MTHFD1L);P52209(PGD);Q7L5L3(GDPD3);P30043(BLVRB);Q9UBM7(DHCR7);Q53FA7(TP53I3);P32322(PYCR1);Q86YB7(ECHDC2);P08842(STS);Q9C0D9(SELENOI);Q96DC8(ECHDC3);O00763(ACACB);O60476(MAN1A2);P51178(PLCD1);Q9H7F0(ATP13A3);Q9NZC3(GDE1);P46439(GSTM5);Q9H788(SH2D4A);Q9H477(RBKS);P16435(POR);Q9UHK6(AMACR);Q02153(GUCY1B1);Q7Z5P4(HSD17B13);Q13011(E…
PE(15:0/14:1(9Z))	711.464	6.45148	C00350	4.25232	0.241743	0.000112517	map04136	Q7Z3C6(ATG9A);O94817(ATG12);O75083(WDR1);Q99570(PIK3R4);Q14457(BECN1);O75385(ULK1);P62140(PPP1CB);O00443(PIK3C2A);Q9BZK7(TBL1XR1);Q9Y4P1(ATG4B);Q5MNZ9(WIPI1);Q9Y3F4(STRAP);Q5MNZ6(WDR45B);Q6UXN9(WDR82);P78527(PRKDC);P53041(PPP5C);Q9BV38(WDR18);Q9Y484(WDR45);Q04724(TLE1);Q08209(PPP3CA);Q04726(TLE3);O75143(ATG13);Q13315(ATM);Q96Q15(SMG1);P62714(PPP2CB);P36873(PPP1CC);Q8NEB9(PIK3C3);Q9H1Y0(ATG5);P783…	O94817(ATG12);P48454(PPP3CC);O00750(PIK3C2B)
PE(15:0/14:1(9Z))	711.464	6.45148	C00350	4.25232	0.241743	0.000112517	map04140	P51149(RAB7A);Q9Y2H1(STK38L);O94817(ATG12);Q9C0I1(MTMR12);P31749(AKT1);P08069(IGF1R);Q96DI7(SNRNP40);P10398(ARAF);Q9Y3L5(RAP2C);Q9GZM7(TINAGL1);Q68CZ2(TNS3);P10415(BCL2);Q9HBL0(TNS1);Q9Y3F4(STRAP);O14936(CASK);Q9H8W4(PLEKHF2);Q8TB45(DEPTOR);P51809(VAMP7);P56202(CTSW);P61020(RAB5B);Q9Y484(WDR45);O75716(STK16);Q15382(RHEB);P16234(PDGFRA);P37023(ACVRL1);Q05397(PTK2);Q96RR4(CAMKK2);Q9Y371(SH3GLB1);P7…	O94817(ATG12);Q9C0I1(MTMR12);Q9GZM7(TINAGL1);P37023(ACVRL1);Q9BW83(IFT27);O43293(DAPK3);Q8TD08(MAPK15);Q9Y572(RIPK3);O00750(PIK3C2B);P17948(FLT1);P15153(RAC2);O95721(SNAP29);Q96GC9(VMP1);P36897(TGFBR1);P35568(IRS1);Q05513(PRKCZ);P48454(PPP3CC);O14807(MRAS);Q07817(BCL2L1);Q13555(CAMK2G);O15347(HMGB3)
PE(15:0/14:1(9Z))	711.464	6.45148	C00350	4.25232	0.241743	0.000112517	map04723	Q9Y2H1(STK38L);P78368(CSNK1G2);P50151(GNG10);P50150(GNG4);Q00722(PLCB2);Q13523(PRPF4B);Q15147(PLCB4);P31749(AKT1);Q8TD08(MAPK15);Q99685(MGLL);O14561(NDUFAB1);P63096(GNAI1);Q8NCG7(DAGLB);Q01970(PLCB3);Q9NYV4(CDK12);Q13164(MAPK7);Q00534(CDK6);Q00537(CDK17);Q00536(CDK16);Q9GZL7(WDR12);P51812(RPS6KA3);O14727(APAF1);Q15269(PWP2);O14920(IKBKB);O75116(ROCK2);O15530(PDPK1);P63244(RACK1);Q9BV23(ABHD6);Q03…	Q8TD08(MAPK15);Q03113(GNA12);P51178(PLCD1);P03905(MT-ND4);Q02153(GUCY1B1);Q9NRA2(SLC17A5);Q05513(PRKCZ);P19174(PLCG1);Q15111(PLCL1);O15239(NDUFA1);Q86YQ8(CPNE8)
PE(15:0/14:1(9Z))	711.464	6.45148	C00350	4.25232	0.241743	0.000112517	map05130	P68366(TUBA4A);P68363(TUBA1B);Q9UQB8(BAIAP2);Q96FE7(PIK3IP1);Q5EG05(CARD16);P08575(PTPRC);Q13885(TUBB2A);P20936(RASA1);P23469(PTPRE);B2RTY4(MYO9A);Q9Y4C8(RBM19);P84085(ARF5);Q9HAU0(PLEKHA5);P18031(PTPN1);P04070(PROC);O43739(CYTH3);Q14247(CTTN);Q9BUF5(TUBB6);O43516(WIPF1);P09471(GNAO1);Q00537(CDK17);Q00536(CDK16);P53671(LIMK2);Q9BW83(IFT27);P11233(RALA);P63000(RAC1);P11234(RALB);Q9NP72(RAB18);Q147…	Q96FE7(PIK3IP1);P20936(RASA1);O43739(CYTH3);Q9BW83(IFT27);P08519(LPA);Q9H788(SH2D4A);Q5VV41(ARHGEF16);P19174(PLCG1);P01766(IGHV3-13);P00750(PLAT);P04626(ERBB2);A0A0B4J1V2(IGHV2-26);P63261(ACTG1);Q9Y2H5(PLEKHA6);P37023(ACVRL1);Q03113(GNA12);Q12923(PTPN13);Q9NPH3(IL1RAP);P15153(RAC2);Q16825(PTPN21);O15084(ANKRD28);P36897(TGFBR1);P68133(ACTA1);P11171(EPB41);Q3ZCM7(TUBB8);Q6EMK4(VASN);A0A0B4J1V6(IGHV…
PE(15:0/14:1(9Z))	711.464	6.45148	C00350	4.25232	0.241743	0.000112517	map05167	Q99828(CIB1);Q96M96(FGD4);P17535(JUND);P50151(GNG10);P50150(GNG4);P28068(HLA-DMB);Q9HAV0(GNB4);Q14651(PLS1);Q9Y3L5(RAP2C);Q96CV9(OPTN);Q92478(CLEC2B);Q95460(MR1);P55899(FCGRT);P19838(NFKB1);P16333(NCK1);P10415(BCL2);P04440(HLA-DPB1);P05161(ISG15);P01889(HLA-B);Q13546(RIPK1);P20936(RASA1);Q13164(MAPK7);Q9Y6K9(IKBKG);Q8TB45(DEPTOR);P49137(MAPKAPK2);P55083(MFAP4);O75460(ERN1);O75462(CRLF1);P55957(BI…	Q95460(MR1);P05161(ISG15);P20936(RASA1);P37023(ACVRL1);P04626(ERBB2);Q9Y572(RIPK3);P30511(HLA-F);Q99983(OMD);P42224(STAT1);O00750(PIK3C2B);Q8TDX7(NEK7);Q8TD08(MAPK15);P02671(FGA);P02675(FGB);Q9H788(SH2D4A);Q00978(IRF9);P15153(RAC2);P01920(HLA-DQB1);Q05513(PRKCZ);P24941(CDK2);P02776(PF4);P13598(ICAM2);O15084(ANKRD28);P14923(JUP);O15123(ANGPT2);P13762(HLA-DRB4);O60885(BRD4);Q96T88(UHRF1);P51178(PLC…
2,4-Dimethylbenzenesulfonic acid	185.028	5.41593	-	2.81323	1.83531	3.0462e-05
Coenzyme A	382.55	3.30977	C00010	2.31767	0.723169	0.00255444	map00071	Q02252(ALDH6A1);O95573(ACSL3);P40939(HADHA);P28329(CHAT);Q15067(ACOX1);Q9Y2S2(CRYL1);Q9H2A2(ALDH8A1);Q96CM8(ACSF2);P09110(ACAA1);O75521(ECI2);P51648(ALDH3A2);P51649(ALDH5A1);Q9BWD1(ACAT2);Q16836(HADH);Q13011(ECH1);Q9UKG9(CROT);Q709F0(ACAD11);Q4G176(ACSF3);P30038(ALDH4A1);P07108(DBI);Q8IZ83(ALDH16A1);P16219(ACADS);P00352(ALDH1A1);O94788(ALDH1A2);Q9Y232(CDYL);P24557(TBXAS1);Q13825(AUH);P43353(ALDH3…	Q9H2A2(ALDH8A1);Q96CM8(ACSF2);P51649(ALDH5A1);Q13011(ECH1);P30038(ALDH4A1);P00352(ALDH1A1);O94788(ALDH1A2);Q13825(AUH);Q16678(CYP1B1);O14975(SLC27A2);P50416(CPT1A);P00325(ADH1B);P05091(ALDH2);Q86YB7(ECHDC2);Q96DC8(ECHDC3);P11511(CYP19A1)
Coenzyme A	382.55	3.30977	C00010	2.31767	0.723169	0.00255444	map00770	Q9H2A2(ALDH8A1);P51648(ALDH3A2);P51649(ALDH5A1);P47895(ALDH1A3);Q14194(CRMP1);Q14195(DPYSL3);P30038(ALDH4A1);Q13057(COASY);Q8IZ83(ALDH16A1);Q9HAB8(PPCS);P00352(ALDH1A1);O94788(ALDH1A2);O95498(VNN2);Q02127(DHODH);P43353(ALDH3B1);P49189(ALDH9A1);Q3SY69(ALDH1L2);Q8WVC6(DCAKD);P30837(ALDH1B1);Q9NRN7(AASDHPPT);Q9BZ23(PANK2);P43251(BTD);Q02252(ALDH6A1);Q13822(ENPP2);Q12882(DPYD);O95497(VNN1);O14531(DPY…	Q9H2A2(ALDH8A1);P51649(ALDH5A1);Q14194(CRMP1);P30038(ALDH4A1);P00352(ALDH1A1);O94788(ALDH1A2);O95498(VNN2);Q13822(ENPP2);O14531(DPYSL4);Q6UWV6(ENPP7);P05091(ALDH2);P22413(ENPP1);Q16555(DPYSL2)
Coenzyme A	382.55	3.30977	C00010	2.31767	0.723169	0.00255444	map01100	Q8NCL4(GALNT6);Q96I99(SUCLG2);Q99943(AGPAT1);P23526(AHCY);P30613(PKLR);Q96N66(MBOAT7);P00167(CYB5A);Q9NSC7(ST6GALNAC1);Q15274(QPRT);P08574(CYC1);Q13884(SNTB1);P20936(RASA1);Q8N0U8(VKORC1L1);Q13057(COASY);Q8TB45(DEPTOR);P00558(PGK1);Q9P2T1(GMPR2);Q00722(PLCB2);P22392(NME2);Q9NZL9(MAT2B);P04075(ALDOA);Q13724(MOGS);Q9NQ88(TIGAR);Q96LJ7(DHRS1);P13995(MTHFD2);Q6UB35(MTHFD1L);Q14247(CTTN);Q01970(PLCB3)…	Q8NCL4(GALNT6);P30613(PKLR);Q9NSC7(ST6GALNAC1);P20936(RASA1);Q6UB35(MTHFD1L);P52209(PGD);Q7L5L3(GDPD3);P30043(BLVRB);Q9UBM7(DHCR7);Q53FA7(TP53I3);P32322(PYCR1);Q86YB7(ECHDC2);P08842(STS);Q9C0D9(SELENOI);Q96DC8(ECHDC3);O00763(ACACB);O60476(MAN1A2);P51178(PLCD1);Q9H7F0(ATP13A3);Q9NZC3(GDE1);P46439(GSTM5);Q9H788(SH2D4A);Q9H477(RBKS);P16435(POR);Q9UHK6(AMACR);Q02153(GUCY1B1);Q7Z5P4(HSD17B13);Q13011(E…
Coenzyme A	382.55	3.30977	C00010	2.31767	0.723169	0.00255444	map01240	P23381(WARS1);P05165(PCCA);O75911(DHRS3);Q15274(QPRT);P49327(FASN);Q96I15(SCLY);Q8N0U8(VKORC1L1);Q13057(COASY);Q9Y3D8(AK6);Q9Y5P6(GMPPB);P30038(ALDH4A1);Q6XQN6(NAPRT);Q02127(DHODH);P22392(NME2);Q9NZL9(MAT2B);P27708(CAD);Q9H2A2(ALDH8A1);P15559(NQO1);Q96LJ7(DHRS1);P13995(MTHFD2);Q6UB35(MTHFD1L);Q3SXM5(HSDL1);O15270(SPTLC2);Q9BZ23(PANK2);P56937(HSD17B7);P00390(GSR);Q9H008(LHPP);Q6YN16(HSDL2);Q6IA69(…	P30038(ALDH4A1);Q9H2A2(ALDH8A1);Q6UB35(MTHFD1L);Q8N4T8(CBR4);Q9NVS9(PNPO);Q92820(GGH);O00763(ACACB);Q9BPW9(DHRS9);O14531(DPYSL4);P28845(HSD11B1);P05091(ALDH2);Q7Z5P4(HSD17B13);P17516(AKR1C4);P36551(CPOX);P13716(ALAD);P38435(GGCX);P15428(HPGD);P80365(HSD11B2);Q5EBM0(CMPK2);Q03393(PTS);P51649(ALDH5A1);P00352(ALDH1A1);O94788(ALDH1A2);P05186(ALPL);Q96EY8(MMAB);P14061(HSD17B1);Q7Z4W1(DCXR)
Coenzyme A	382.55	3.30977	C00010	2.31767	0.723169	0.00255444	map04216	Q9NP59(SLC40A1);P09601(HMOX1);Q15365(PCBP1);P33121(ACSL1);P49281(SLC11A2);Q96N66(MBOAT7);O95573(ACSL3);A6NCE7(MAP1LC3B2);P18054(ALOX12);P48506(GCLC);Q4G176(ACSF3);Q04609(FOLH1);Q15043(SLC39A14);Q9Y6M1(IGF2BP2);P22352(GPX3);Q9Y3Q0(NAALAD2);O00425(IGF2BP3);Q9UHI5(SLC7A8);P04839(CYBB);Q9BQS7(HEPH);P04156(PRNP);Q15366(PCBP2);Q8TED1(GPX8);P52569(SLC7A2);P61978(HNRNPK);P45880(VDAC2);Q9H1Y0(ATG5);Q9Y277…	Q9Y6M1(IGF2BP2);O00425(IGF2BP3);P52569(SLC7A2);P02792(FTL);P02794(FTH1);Q658P3(STEAP3);Q9C0K1(SLC39A8);Q96CM8(ACSF2);Q9NZI8(IGF2BP1);P02788(LTF);Q01650(SLC7A5)
Coenzyme A	382.55	3.30977	C00010	2.31767	0.723169	0.00255444	map04714	Q9Y2H1(STK38L);P03915(MT-ND5);Q9Y478(PRKAB1);Q99541(PLIN2);P31749(AKT1);Q16270(IGFBP7);P14854(COX6B1);P36542(ATP5F1C);Q9Y3L5(RAP2C);Q96CQ1(SLC25A36);Q5RI15(COX20);Q92882(OSTF1);Q13523(PRPF4B);P08574(CYC1);P20674(COX5A);Q13546(RIPK1);P20936(RASA1);O75886(STAM2);P08476(INHBA);P17948(FLT1);Q8NFD5(ARID1B);P49137(MAPKAPK2);P08069(IGF1R);Q99685(MGLL);P62993(GRB2);P48047(ATP5PO);P62753(RPS6);Q15382(RHEB…	Q99541(PLIN2);P20936(RASA1);P17948(FLT1);Q9UIF9(BAZ2A);P50416(CPT1A);Q03113(GNA12);P17342(NPR3);P00414(MT-CO3);Q8TD08(MAPK15);P03905(MT-ND4);Q02153(GUCY1B1);O15239(NDUFA1);Q96T88(UHRF1);P00846(MT-ATP6);Q05513(PRKCZ);P27338(MAOB);P68133(ACTA1);Q99856(ARID3A);P19174(PLCG1);O14807(MRAS);Q7LDG7(RASGRP2);Q8IVW6(ARID3B);Q99988(GDF15);Q96CM8(ACSF2);Q9UJS0(SLC25A13);Q9Y619(SLC25A15);Q13555(CAMK2G);P22760…
Coenzyme A	382.55	3.30977	C00010	2.31767	0.723169	0.00255444	map04725	Q9Y2H1(STK38L);P31749(AKT1);P50150(GNG4);Q00722(PLCB2);P10398(ARAF);Q9Y3L5(RAP2C);P23141(CES1);P16333(NCK1);Q9NYL2(MAP3K20);Q15147(PLCB4);P20936(RASA1);O14936(CASK);P50151(GNG10);P78527(PRKDC);P62993(GRB2);Q15269(PWP2);Q15382(RHEB);P63096(GNAI1);P37023(ACVRL1);P43405(SYK);P08913(ADRA2A);P43403(ZAP70);Q96RR4(CAMKK2);Q01970(PLCB3);Q14012(CAMK1);Q9NYV4(CDK12);Q6UXN9(WDR82);Q13164(MAPK7);P09471(GNAO1…	P20936(RASA1);P37023(ACVRL1);P50416(CPT1A);Q03113(GNA12);O43293(DAPK3);O00750(PIK3C2B);Q8TD08(MAPK15);P51178(PLCD1);Q02153(GUCY1B1);Q05513(PRKCZ);P19174(PLCG1);O14807(MRAS);Q15111(PLCL1);P29323(EPHB2);Q07817(BCL2L1);Q9UKY3(CES1P1);Q13555(CAMK2G);Q86YQ8(CPNE8)
Coenzyme A	382.55	3.30977	C00010	2.31767	0.723169	0.00255444	map04975	O94911(ABCA8);O15118(NPC1);Q99943(AGPAT1);Q9NP58(ABCB6);P09110(ACAA1);P02647(APOA1);P04114(APOB);Q8N0W4(NLGN4X);P55084(HADHB);Q4G176(ACSF3);Q03518(TAP1);O95477(ABCA1);P29373(CRABP2);Q5K4L6(SLC27A3);Q8WTV0(SCARB1);O14975(SLC27A2);P08183(ABCB1);Q6P1M0(SLC27A4);Q9NUT2(ABCB8);Q9NUB1(ACSS1);P42765(ACAA2);P24752(ACAT1);Q6PCB7(SLC27A1);P14555(PLA2G2A);Q9UKY3(CES1P1);O75907(DGAT1);P09455(RBP1);P23141(CES…	O94911(ABCA8);O14975(SLC27A2);P08183(ABCB1);Q9NUB1(ACSS1);P14555(PLA2G2A);Q9UKY3(CES1P1);O75907(DGAT1);P09455(RBP1);P16671(CD36);O95342(ABCB11);P05413(FABP3);Q8WWY8(LIPH)
Coenzyme A	382.55	3.30977	C00010	2.31767	0.723169	0.00255444	map04977	P33897(ABCD1);Q9NP58(ABCB6);Q9NUT2(ABCB8);P02647(APOA1);O95342(ABCB11);P04114(APOB);P33527(ABCC1);Q03518(TAP1);Q9Y3Q0(NAALAD2);O14678(ABCD4);O95498(VNN2);Q04609(FOLH1);Q9Y646(CPQ);P08183(ABCB1);O95497(VNN1);P28288(ABCD3);Q9UG63(ABCF2);Q03519(TAP2);Q9NQ36(SCUBE2);P43251(BTD);O14786(NRP1);P09455(RBP1);P29373(CRABP2);Q9NUN5(LMBRD1);Q58DX5(NAALADL2);P13497(BMP1);P06727(APOA4);Q9Y289(SLC5A6);Q8IWY4(SC…	O95342(ABCB11);P33527(ABCC1);O95498(VNN2);P08183(ABCB1);P09455(RBP1);Q8IWY4(SCUBE1);P05413(FABP3);Q8WWY8(LIPH);O60462(NRP2);P20061(TCN1)
Monoethylhexyl phthalic acid	313.119	3.53908	C03343	1.92368	1.27332	0.00202842
PG(i-19:0/18:1(9Z)-O(12,13))	822.592	6.48842	-	2.44524	0.766809	0.00125132
PA(16:0/14:1(9Z))	636.462	6.5464	C00416	2.54327	1.50938	0.00558839	map00561	Q9UKY3(CES1P1);Q7L5N7(LPCAT2);Q99943(AGPAT1);Q9H2A2(ALDH8A1);Q9NRZ7(AGPAT3);Q96N66(MBOAT7);P23141(CES1);P51648(ALDH3A2);P51649(ALDH5A1);Q8N0W4(NLGN4X);P47895(ALDH1A3);P15121(AKR1B1);P30038(ALDH4A1);P38571(LIPA);Q8IZ83(ALDH16A1);O14494(PLPP1);P00352(ALDH1A1);O94788(ALDH1A2);Q53H12(AGK);P43353(ALDH3B1);P49189(ALDH9A1);Q3LXA3(TKFC);O95870(ABHD16A);P17516(AKR1C4);P30837(ALDH1B1);P61601(NCALD);P14550(…	Q9UKY3(CES1P1);Q9H2A2(ALDH8A1);P51649(ALDH5A1);P30038(ALDH4A1);P00352(ALDH1A1);O94788(ALDH1A2);P17516(AKR1C4);O75907(DGAT1);P05091(ALDH2);Q8WWY8(LIPH)
PA(16:0/14:1(9Z))	636.462	6.5464	C00416	2.54327	1.50938	0.00558839	map00564	O14495(PLPP3);Q7L5N7(LPCAT2);P28329(CHAT);Q9NRZ7(AGPAT3);Q8IY17(PNPLA6);Q9C0D9(SELENOI);O14939(PLD2);Q96N66(MBOAT7);P23141(CES1);P80404(ABAT);Q8IV08(PLD3);O14735(CDIPT);Q3MJ16(PLA2G4E);Q99447(PCYT2);Q5VWZ2(LYPLAL1);Q99943(AGPAT1);P43155(CRAT);O95674(CDS2);Q8N335(GPD1L);Q99828(CIB1);P61601(NCALD);Q9Y6K0(CEPT1);Q13393(PLD1);Q6P1A2(LPCAT3);P14555(PLA2G2A);P63098(PPP3R1);Q9Y259(CHKB);Q9UKY3(CES1P1);Q…	Q9C0D9(SELENOI);P80404(ABAT);Q13393(PLD1);P14555(PLA2G2A);Q9UKY3(CES1P1);P50416(CPT1A);Q8WWY8(LIPH);Q8WUD6(CHPT1)
PA(16:0/14:1(9Z))	636.462	6.5464	C00416	2.54327	1.50938	0.00558839	map01100	Q8NCL4(GALNT6);Q96I99(SUCLG2);Q99943(AGPAT1);P23526(AHCY);P30613(PKLR);Q96N66(MBOAT7);P00167(CYB5A);Q9NSC7(ST6GALNAC1);Q15274(QPRT);P08574(CYC1);Q13884(SNTB1);P20936(RASA1);Q8N0U8(VKORC1L1);Q13057(COASY);Q8TB45(DEPTOR);P00558(PGK1);Q9P2T1(GMPR2);Q00722(PLCB2);P22392(NME2);Q9NZL9(MAT2B);P04075(ALDOA);Q13724(MOGS);Q9NQ88(TIGAR);Q96LJ7(DHRS1);P13995(MTHFD2);Q6UB35(MTHFD1L);Q14247(CTTN);Q01970(PLCB3)…	Q8NCL4(GALNT6);P30613(PKLR);Q9NSC7(ST6GALNAC1);P20936(RASA1);Q6UB35(MTHFD1L);P52209(PGD);Q7L5L3(GDPD3);P30043(BLVRB);Q9UBM7(DHCR7);Q53FA7(TP53I3);P32322(PYCR1);Q86YB7(ECHDC2);P08842(STS);Q9C0D9(SELENOI);Q96DC8(ECHDC3);O00763(ACACB);O60476(MAN1A2);P51178(PLCD1);Q9H7F0(ATP13A3);Q9NZC3(GDE1);P46439(GSTM5);Q9H788(SH2D4A);Q9H477(RBKS);P16435(POR);Q9UHK6(AMACR);Q02153(GUCY1B1);Q7Z5P4(HSD17B13);Q13011(E…
PA(16:0/14:1(9Z))	636.462	6.5464	C00416	2.54327	1.50938	0.00558839	map04024	Q9Y2H1(STK38L);P17535(JUND);P31749(AKT1);Q9NUT2(ABCB8);Q00722(PLCB2);Q9Y3L5(RAP2C);Q9Y4K4(MAP4K5);P19838(NFKB1);Q8N139(ABCA6);Q13523(PRPF4B);P46734(MAP2K3);Q15147(PLCB4);P09471(GNAO1);O14939(PLD2);O14936(CASK);Q8TB45(DEPTOR);O75185(ATP2C2);O75460(ERN1);Q03518(TAP1);Q03519(TAP2);P98194(ATP2C1);P98196(ATP11A);O14974(PPP1R12A);Q15382(RHEB);O15211(RGL2);O15438(ABCC3);Q15027(ACAP1);P08183(ABCB1);P4984…	O75185(ATP2C2);P08183(ABCB1);O60885(BRD4);Q8TDY4(ASAP3);Q03113(GNA12);Q05513(PRKCZ);O00168(FXYD1);P33527(ABCC1);Q8TD08(MAPK15);P17342(NPR3);P51178(PLCD1);Q9H7F0(ATP13A3);P15153(RAC2);Q5VV41(ARHGEF16);Q02153(GUCY1B1);O15084(ANKRD28);P22760(AADAC);Q13393(PLD1);O95342(ABCB11);A6NKQ9(CGB1);Q7LDG7(RASGRP2);P37023(ACVRL1);Q8WU79(SMAP2);Q9BXB1(LGR4);P19174(PLCG1);O14807(MRAS);O43293(DAPK3);Q9BQI0(AIF1L)…
PA(16:0/14:1(9Z))	636.462	6.5464	C00416	2.54327	1.50938	0.00558839	map04070	Q99828(CIB1);Q9C0I1(MTMR12);P31749(AKT1);Q00722(PLCB2);Q68CZ2(TNS3);O14735(CDIPT);Q9HBL0(TNS1);Q15147(PLCB4);P20936(RASA1);Q9H8W4(PLEKHF2);Q8TB45(DEPTOR);P78527(PRKDC);P62993(GRB2);A1X283(SH3PXD2B);P61601(NCALD);Q96B97(SH3KBP1);Q14247(CTTN);Q01970(PLCB3);Q9NTJ5(SACM1L);Q9UJU6(DBNL);P51812(RPS6KA3);Q8NCE2(MTMR14);O75116(ROCK2);Q96T51(RUFY1);O15530(PDPK1);O95861(BPNT1);Q7Z3T8(ZFYVE16);P37235(HPCAL1…	Q9C0I1(MTMR12);P20936(RASA1);P51178(PLCD1);Q9H788(SH2D4A);Q15283(RASA2);Q9BT40(INPP5K);P49441(INPP1);Q05513(PRKCZ);P19174(PLCG1);Q9BQI0(AIF1L);P12829(MYL4);Q15111(PLCL1);O00750(PIK3C2B);Q86YQ8(CPNE8)
PA(16:0/14:1(9Z))	636.462	6.5464	C00416	2.54327	1.50938	0.00558839	map04072	P18433(PTPRA);Q9Y2H5(PLEKHA6);P08069(IGF1R);Q00722(PLCB2);Q99828(CIB1);Q9Y3L5(RAP2C);Q96FE7(PIK3IP1);Q9NYV4(CDK12);P16333(NCK1);Q9NYL2(MAP3K20);P08575(PTPRC);Q15147(PLCB4);P20936(RASA1);O75886(STAM2);P31749(AKT1);P23469(PTPRE);Q8TD08(MAPK15);P84085(ARF5);Q6UXH9(PAMR1);Q9HAU0(PLEKHA5);P62993(GRB2);Q15382(RHEB);P18031(PTPN1);Q8NEB9(PIK3C3);Q15052(ARHGEF6);O00429(DNM1L);P16234(PDGFRA);P04070(PROC);P…	Q9Y2H5(PLEKHA6);Q96FE7(PIK3IP1);P20936(RASA1);Q8TD08(MAPK15);Q6UXH9(PAMR1);P37023(ACVRL1);O43739(CYTH3);P01780(IGHV3-7);P04626(ERBB2);O00750(PIK3C2B);Q12923(PTPN13);Q9Y572(RIPK3);P17948(FLT1);P51178(PLCD1);Q9H788(SH2D4A);P15153(RAC2);P00734(F2);Q02153(GUCY1B1);Q16825(PTPN21);Q13393(PLD1);P36897(TGFBR1);Q9NZH0(GPRC5B);Q05513(PRKCZ);P02775(PPBP);P19174(PLCG1);O14807(MRAS);Q15111(PLCL1);P01766(IGHV3…
PA(16:0/14:1(9Z))	636.462	6.5464	C00416	2.54327	1.50938	0.00558839	map04666	P31749(AKT1);P08575(PTPRC);P20936(RASA1);P23469(PTPRE);P23468(PTPRD);P84085(ARF5);P18031(PTPN1);O14639(ABLIM1);Q05397(PTK2);Q14247(CTTN);Q01970(PLCB3);Q5VYY1(ANKRD22);P09471(GNAO1);Q00537(CDK17);Q00536(CDK16);O95425(SVIL);O00499(BIN1);Q8N8S7(ENAH);P53671(LIMK2);P63000(RAC1);P35749(MYH11);P16885(PLCG2);P04049(RAF1);P29966(MARCKS);B2RTY4(MYO9A);Q9BX66(SORBS1);O00401(WASL);P51178(PLCD1);P18085(ARF4)…	P20936(RASA1);P51178(PLCD1);Q9H788(SH2D4A);Q5VV41(ARHGEF16);P19174(PLCG1);P04626(ERBB2);A0A0B4J1V2(IGHV2-26);A0A0B4J1V6(IGHV3-73);Q86YQ8(CPNE8);P63261(ACTG1);Q13643(FHL3);P37023(ACVRL1);Q8WU79(SMAP2);P15153(RAC2);Q9BT40(INPP5K);Q16825(PTPN21);P36897(TGFBR1);P68133(ACTA1);P01766(IGHV3-13);Q9Y572(RIPK3);Q8N1I0(DOCK4);P10586(PTPRF);O94929(ABLIM3);Q9Y281(CFL2);Q05513(PRKCZ);Q9H7D0(DOCK5);Q6H8Q1(ABLIM…
PA(16:0/14:1(9Z))	636.462	6.5464	C00416	2.54327	1.50938	0.00558839	map04912	Q9Y2H1(STK38L);P31749(AKT1);Q00722(PLCB2);Q9Y3L5(RAP2C);P61586(RHOA);Q92882(OSTF1);Q13523(PRPF4B);Q15147(PLCB4);P20936(RASA1);O14807(MRAS);O14936(CASK);P49137(MAPKAPK2);Q8TD08(MAPK15);P62993(GRB2);Q99683(MAP3K5);O60307(MAST3);P63096(GNAI1);P37023(ACVRL1);P43405(SYK);P43403(ZAP70);Q05397(PTK2);Q96RR4(CAMKK2);Q14247(CTTN);Q01970(PLCB3);Q14012(CAMK1);Q9NYV4(CDK12);Q13164(MAPK7);P09471(GNAO1);Q00537(…	P20936(RASA1);O14807(MRAS);Q8TD08(MAPK15);P37023(ACVRL1);Q9BQI0(AIF1L);P04004(VTN);Q03113(GNA12);P36897(TGFBR1);O43293(DAPK3);Q8TDX7(NEK7);P51178(PLCD1);P24941(CDK2);P22894(MMP8);P15153(RAC2);P51511(MMP15);P14780(MMP9);Q02153(GUCY1B1);Q13393(PLD1);A6NKQ9(CGB1);Q05513(PRKCZ);P02751(FN1);P19174(PLCG1);Q99986(VRK1);P12829(MYL4);Q15111(PLCL1);P29323(EPHB2);P01215(CGA);Q7LDG7(RASGRP2);P04626(ERBB2);Q1…
PA(16:0/14:1(9Z))	636.462	6.5464	C00416	2.54327	1.50938	0.00558839	map04975	O94911(ABCA8);O15118(NPC1);Q99943(AGPAT1);Q9NP58(ABCB6);P09110(ACAA1);P02647(APOA1);P04114(APOB);Q8N0W4(NLGN4X);P55084(HADHB);Q4G176(ACSF3);Q03518(TAP1);O95477(ABCA1);P29373(CRABP2);Q5K4L6(SLC27A3);Q8WTV0(SCARB1);O14975(SLC27A2);P08183(ABCB1);Q6P1M0(SLC27A4);Q9NUT2(ABCB8);Q9NUB1(ACSS1);P42765(ACAA2);P24752(ACAT1);Q6PCB7(SLC27A1);P14555(PLA2G2A);Q9UKY3(CES1P1);O75907(DGAT1);P09455(RBP1);P23141(CES…	O94911(ABCA8);O14975(SLC27A2);P08183(ABCB1);Q9NUB1(ACSS1);P14555(PLA2G2A);Q9UKY3(CES1P1);O75907(DGAT1);P09455(RBP1);P16671(CD36);O95342(ABCB11);P05413(FABP3);Q8WWY8(LIPH)
PA(16:0/14:1(9Z))	636.462	6.5464	C00416	2.54327	1.50938	0.00558839	map05200	Q02447(SP3);P50151(GNG10);P50150(GNG4);Q96FE7(PIK3IP1);P08572(COL4A2);P20936(RASA1);P31749(AKT1);O75610(LEFTY1);P23468(PTPRD);Q15269(PWP2);P16435(POR);P04070(PROC);Q05397(PTK2);P04278(SHBG);Q14247(CTTN);Q01970(PLCB3);Q8N392(ARHGAP18);Q01974(ROR2);Q00535(CDK5);Q00534(CDK6);Q00537(CDK17);P26232(CTNNA2);P15735(PHKG2);Q12931(TRAP1);P53671(LIMK2);P11233(RALA);Q99735(MGST2);P63000(RAC1);P11234(RALB);Q1…	Q96FE7(PIK3IP1);P08572(COL4A2);P20936(RASA1);P16435(POR);P49863(GZMK);Q9NQT8(KIF13B);Q8TDX7(NEK7);P51178(PLCD1);P11465(PSG2);P11169(SLC2A3);P46439(GSTM5);Q9H788(SH2D4A);Q5VV41(ARHGEF16);P01034(CST3);Q02153(GUCY1B1);A6NMZ7(COL6A6);Q13753(LAMC2);P51511(MMP15);O60760(HPGDS);Q9NPF0(CD320);P98160(HSPG2);O43240(KLK10);P12829(MYL4);P00750(PLAT);P04626(ERBB2);Q9UNX4(WDR3);Q8IUX8(EGFL6);Q14031(COL4A6);Q8W…
PA(16:0/14:1(9Z))	636.462	6.5464	C00416	2.54327	1.50938	0.00558839	map05212	Q9Y2H1(STK38L);P31749(AKT1);P10398(ARAF);Q9Y3L5(RAP2C);Q96CV9(OPTN);Q92882(OSTF1);P10415(BCL2);O14939(PLD2);Q9Y6K9(IKBKG);P78527(PRKDC);Q13017(ARHGAP5);Q15382(RHEB);O60307(MAST3);P37023(ACVRL1);P43405(SYK);Q14155(ARHGEF7);Q96B97(SH3KBP1);Q15052(ARHGEF6);P08581(MET);Q8IUH4(ZDHHC13);Q8N392(ARHGAP18);P27361(MAPK3);Q15811(ITSN1);Q9Y3M8(STARD13);P49918(CDKN1C);Q13164(MAPK7);Q00535(CDK5);Q00534(CDK6);Q…	P37023(ACVRL1);P36897(TGFBR1);P42224(STAT1);Q8TD08(MAPK15);P15153(RAC2);P24941(CDK2);O15084(ANKRD28);Q13393(PLD1);Q05513(PRKCZ);O14807(MRAS);Q7LDG7(RASGRP2);O00750(PIK3C2B);P29122(PCSK6);P04626(ERBB2);Q07817(BCL2L1);P61812(TGFB2);P84022(SMAD3)
PA(16:0/14:1(9Z))	636.462	6.5464	C00416	2.54327	1.50938	0.00558839	map05231	Q9Y2H1(STK38L);Q02447(SP3);O75751(SLC22A3);P31749(AKT1);Q00722(PLCB2);Q99828(CIB1);Q9Y3L5(RAP2C);Q92882(OSTF1);Q13523(PRPF4B);Q99447(PCYT2);Q5VWZ2(LYPLAL1);P20936(RASA1);Q8IWA5(SLC44A2);Q8TD08(MAPK15);P62993(GRB2);Q15382(RHEB);O15211(RGL2);P16234(PDGFRA);P61601(NCALD);P37023(ACVRL1);O00443(PIK3C2A);Q96B97(SH3KBP1);Q15052(ARHGEF6);Q14247(CTTN);Q01970(PLCB3);Q9NYV4(CDK12);Q13164(MAPK7);Q96FS4(SIPA1…	O75751(SLC22A3);P20936(RASA1);Q8TD08(MAPK15);P37023(ACVRL1);P51178(PLCD1);Q15111(PLCL1);O00750(PIK3C2B);P17948(FLT1);Q9H788(SH2D4A);P15153(RAC2);P11166(SLC2A1);Q13393(PLD1);P36897(TGFBR1);Q05513(PRKCZ);P19174(PLCG1);Q8WUD6(CHPT1);Q9NSA0(SLC22A11);O14807(MRAS);Q9C0D9(SELENOI);P11169(SLC2A3);Q7LDG7(RASGRP2);P04626(ERBB2);Q86YQ8(CPNE8);Q13542(EIF4EBP2);Q8WUF5(PPP1R13L)
Acetaminophen	301.119	5.96185	C06804	1.8008	1.24435	0.00279564	map04976	Q9Y2H1(STK38L);O75751(SLC22A3);P31749(AKT1);Q9NUT2(ABCB8);Q92673(SORL1);P33527(ABCC1);O75185(ATP2C2);Q03518(TAP1);Q03519(TAP2);P98194(ATP2C1);P08183(ABCB1);Q6P1M0(SLC27A4);P50225(SULT1A1);P63096(GNAI1);P28702(RXRB);Q96RR4(CAMKK2);P09471(GNAO1);Q14344(GNA13);P51812(RPS6KA3);Q16647(PTGIS);O15438(ABCC3);O14920(IKBKB);P61221(ABCE1);O75110(ATP9A);P04920(SLC4A2);O75116(ROCK2);O15530(PDPK1);Q53FZ2(ACSM3…	O75751(SLC22A3);P33527(ABCC1);O75185(ATP2C2);P08183(ABCB1);P28702(RXRB);Q03113(GNA12);P55064(AQP5);Q92959(SLCO2A1);O00168(FXYD1);Q9H7F0(ATP13A3);Q02153(GUCY1B1);O94911(ABCA8);O14975(SLC27A2);O95342(ABCB11);Q05513(PRKCZ);P02730(SLC4A1);P07451(CA3);P00915(CA1);P11169(SLC2A3);P11166(SLC2A1);Q96BD0(SLCO4A1);Q96CM8(ACSF2);Q9NSA0(SLC22A11);P05108(CYP11A1);P22760(AADAC);P11511(CYP19A1)
Ibuprofen	241.098	3.41642	C01588	2.28097	1.51906	0.000196709
2,2-dimethylpentanedioylcarnitine	268.151	3.6465	-	1.51328	1.2266	0.0154305
[(2R,3S,5R)-5-[6-(Methylamino)purin-9-yl]-2-(phosphonooxymethyl)oxolan-3-yl] dihydrogen phosphate	470.046	0.692317	-	1.73188	1.26837	0.00634926
Carbamazepine	269.128	4.18632	C06868	1.70512	1.20953	0.00156918	map00982	P21397(MAOA);Q9H2A2(ALDH8A1);P51648(ALDH3A2);P51649(ALDH5A1);P05108(CYP11A1);P09488(GSTM1);P47895(ALDH1A3);Q9Y2Q3(GSTK1);P30711(GSTT1);P09211(GSTP1);P20292(ALOX5AP);P08263(GSTA1);Q6UW02(CYP20A1);P00352(ALDH1A1);O94788(ALDH1A2);P30038(ALDH4A1);P24557(TBXAS1);O60760(HPGDS);P49189(ALDH9A1);P27338(MAOB);P30837(ALDH1B1);Q06278(AOX1);Q16678(CYP1B1);P28161(GSTM2);Q00796(SORD);O60341(KDM1A);Q02252(ALDH6A…	Q9H2A2(ALDH8A1);P51649(ALDH5A1);P05108(CYP11A1);P09488(GSTM1);P30711(GSTT1);P08263(GSTA1);P00352(ALDH1A1);O94788(ALDH1A2);P30038(ALDH4A1);O60760(HPGDS);P27338(MAOB);Q16678(CYP1B1);P46439(GSTM5);O14684(PTGES);P00325(ADH1B);O14880(MGST3);P21266(GSTM3);P05091(ALDH2);P11511(CYP19A1)
15-crown-5	243.12	3.97683	-	2.43989	1.55569	0.00829979
2,5-Furandicarboxylic acid	154.999	1.13613	C20450	1.77543	1.40435	0.0130662
Argatroban	543.213	5.81245	C04931	1.66892	1.26129	0.0199999
Ponasterone A	445.296	6.21783	C08835	2.039	1.46051	0.00192588
Azobilirubin	879.304	3.91482	-	1.38114	1.30102	0.00747518
All-trans-Carophyll yellow	505.332	6.68195	-	1.88891	0.811107	0.00247708
Sinalexin	249.034	4.15532	-	1.90728	1.37426	0.000761049
S-(2-Chloroacetyl)glutathione	447.067	0.608333	C14864	1.36679	0.816333	0.00532555	map00980	Q53GQ0(HSD17B12);Q8N4T8(CBR4);Q8N5I4(DHRSX);Q9H2A2(ALDH8A1);P16152(CBR1);P50225(SULT1A1);O75911(DHRS3);P51648(ALDH3A2);Q96SQ9(CYP2S1);P05108(CYP11A1);P09488(GSTM1);Q6IAN0(DHRS7B);P47895(ALDH1A3);P15121(AKR1B1);Q9Y2Q3(GSTK1);P30038(ALDH4A1);P09211(GSTP1);P20292(ALOX5AP);P07099(EPHX1);P08263(GSTA1);Q6UW02(CYP20A1);P00352(ALDH1A1);O94788(ALDH1A2);O75828(CBR3);Q8TC12(RDH11);P24557(TBXAS1);O60760(HPGD…	Q8N4T8(CBR4);Q9H2A2(ALDH8A1);P05108(CYP11A1);P09488(GSTM1);P30038(ALDH4A1);P08263(GSTA1);P00352(ALDH1A1);O94788(ALDH1A2);O60760(HPGDS);P30711(GSTT1);Q9BPW9(DHRS9);Q16678(CYP1B1);P46439(GSTM5);P17516(AKR1C4);P51649(ALDH5A1);O14684(PTGES);P00325(ADH1B);P28845(HSD11B1);O14880(MGST3);P21266(GSTM3);P05091(ALDH2);P14061(HSD17B1);Q7Z5P4(HSD17B13);P80365(HSD11B2);P11511(CYP19A1)
(2S,3S,4S,5R)-3,4,5-Trihydroxy-6-sulfooxyoxane-2-carboxylic acid	318.998	0.996783	-	1.54475	1.2584	0.0324332
Diethylamine	74.0964	0.624317	C14422	1.85872	0.782734	0.00475801
2-O-Galloyl-1,4-galactarolactone	327.031	1.01815	-	1.90133	1.33713	0.00337541
Barringtogenol C	504.382	6.0599	C08931	2.12508	0.682331	0.000164194
Isoniazid alpha-ketoglutaric acid	302.019	1.03443	C16625	1.86401	1.23844	0.00545803	map00983	P12268(IMPDH2);Q92626(PXDN);Q14194(CRMP1);P05164(MPO);Q9BY32(ITPA);P51580(TPMT);P23141(CES1);Q96SQ9(CYP2S1);Q7LG56(RRM2B);P09488(GSTM1);Q8N0W4(NLGN4X);P36959(GMPR);Q16854(DGUOK);Q16831(UPP1);Q14195(DPYSL3);P30711(GSTT1);P09211(GSTP1);P08263(GSTA1);P19971(TYMP);Q9P2T1(GMPR2);P30085(CMPK1);P27707(DCK);Q02127(DHODH);O60760(HPGDS);O14684(PTGES);P18440(NAT1);P11172(UMPS);P20292(ALOX5AP);Q06278(AOX1);Q…	Q92626(PXDN);Q14194(CRMP1);P05164(MPO);P09488(GSTM1);P30711(GSTT1);P08263(GSTA1);P27707(DCK);O60760(HPGDS);O14684(PTGES);Q16678(CYP1B1);Q9UKY3(CES1P1);P04183(TK1);O14531(DPYSL4);P05108(CYP11A1);O14880(MGST3);P21266(GSTM3);P32320(CDA);P46439(GSTM5);Q16555(DPYSL2);P11511(CYP19A1)
Adenosine diphosphate ribose	558.064	0.654933	C00301	1.7944	0.822851	0.00760236	map00230	Q01433(AMPD2);P12268(IMPDH2);Q9BSD7(NTPCR);Q8TCD5(NT5C);Q8N4P3(HDDC3);O43252(PAPSS1);Q9BY32(ITPA);P54819(AK2);Q6PCE3(PGM2L1);P11908(PRPS2);Q96G03(PGM2);Q14432(PDE3A);P31939(ATIC);Q14558(PRPSAP1);Q6UWV6(ENPP7);Q92796(DLG3);Q13126(MTAP);O95340(PAPSS2);P55263(ADK);P36959(GMPR);Q16854(DGUOK);P22234(PAICS);Q9Y3D8(AK6);Q86TP1(PRUNE1);P36871(PGM1);Q9H857(NT5DC2);Q13822(ENPP2);Q06210(GFPT1);Q9P2T1(GMPR2)…	Q8N4P3(HDDC3);Q6UWV6(ENPP7);Q13822(ENPP2);P27707(DCK);P17342(NPR3);Q9Y2T3(GDA);Q96DE0(NUDT16);Q02153(GUCY1B1);P22413(ENPP1);Q8WUY3(PRUNE2);Q9H477(RBKS)
Adenosine diphosphate ribose	558.064	0.654933	C00301	1.7944	0.822851	0.00760236	map01100	Q8NCL4(GALNT6);Q96I99(SUCLG2);Q99943(AGPAT1);P23526(AHCY);P30613(PKLR);Q96N66(MBOAT7);P00167(CYB5A);Q9NSC7(ST6GALNAC1);Q15274(QPRT);P08574(CYC1);Q13884(SNTB1);P20936(RASA1);Q8N0U8(VKORC1L1);Q13057(COASY);Q8TB45(DEPTOR);P00558(PGK1);Q9P2T1(GMPR2);Q00722(PLCB2);P22392(NME2);Q9NZL9(MAT2B);P04075(ALDOA);Q13724(MOGS);Q9NQ88(TIGAR);Q96LJ7(DHRS1);P13995(MTHFD2);Q6UB35(MTHFD1L);Q14247(CTTN);Q01970(PLCB3)…	Q8NCL4(GALNT6);P30613(PKLR);Q9NSC7(ST6GALNAC1);P20936(RASA1);Q6UB35(MTHFD1L);P52209(PGD);Q7L5L3(GDPD3);P30043(BLVRB);Q9UBM7(DHCR7);Q53FA7(TP53I3);P32322(PYCR1);Q86YB7(ECHDC2);P08842(STS);Q9C0D9(SELENOI);Q96DC8(ECHDC3);O00763(ACACB);O60476(MAN1A2);P51178(PLCD1);Q9H7F0(ATP13A3);Q9NZC3(GDE1);P46439(GSTM5);Q9H788(SH2D4A);Q9H477(RBKS);P16435(POR);Q9UHK6(AMACR);Q02153(GUCY1B1);Q7Z5P4(HSD17B13);Q13011(E…
4-Phenyl-1,2,4-triazoline-3,5-dione	214.002	1.04468	-	1.86259	1.25802	0.00767718
19-Benzyl-7-hydroxy-7,9,16,17-tetramethyl-2,4,15-trioxa-20-azatetracyclo[11.8.0.01,18.014,16]henicosa-5,11-diene-3,8,21-trione	534.191	2.55728	-	1.87833	1.27146	0.00279577
N-(2-Hydroxy-3,3,3-trifluoropropyl)-2-(2-nitro-1-imidazolyl)acetamide	303.033	1.01847	-	1.55199	1.27943	0.0389512
Glutamyl pyruvate	262.057	1.50952	-	1.68849	1.34723	0.00558817
Seminaphtharhodafluor	821.218	0.85245	-	1.71429	1.2348	0.00224656
P-coumaroyltriacetic acid lactone	308.009	4.25693	C12087	1.42076	1.35933	0.0264816
Acetylcysteine	327.067	0.94345	C06809	2.15835	1.48714	0.00921142
3-Succinoylpyridine	417.13	5.88713	C19569	2.2931	1.44676	1.73236e-05	map00760	Q8TCD5(NT5C);Q9BQG2(NUDT12);P43490(NAMPT);Q9NWW6(NMRK1);P40261(NNMT);Q9H857(NT5DC2);Q13822(ENPP2);Q6XQN6(NAPRT);P21589(NT5E);Q9HAN9(NMNAT1);Q06278(AOX1);Q86UY8(NT5DC3);P00491(PNP);Q10588(BST1);Q8IXJ6(SIRT2);Q6IA69(NADSYN1);Q9NXA8(SIRT5);Q13126(MTAP);P28907(CD38);Q15274(QPRT);Q4G0N4(NADK2);Q6UWV6(ENPP7);Q13423(NNT);P22413(ENPP1);Q9NTG7(SIRT3);P49902(NT5C2);O95050(INMT)	Q9NWW6(NMRK1);Q13822(ENPP2);Q6UWV6(ENPP7);P22413(ENPP1);O95050(INMT)
3-Succinoylpyridine	417.13	5.88713	C19569	2.2931	1.44676	1.73236e-05	map00980	Q53GQ0(HSD17B12);Q8N4T8(CBR4);Q8N5I4(DHRSX);Q9H2A2(ALDH8A1);P16152(CBR1);P50225(SULT1A1);O75911(DHRS3);P51648(ALDH3A2);Q96SQ9(CYP2S1);P05108(CYP11A1);P09488(GSTM1);Q6IAN0(DHRS7B);P47895(ALDH1A3);P15121(AKR1B1);Q9Y2Q3(GSTK1);P30038(ALDH4A1);P09211(GSTP1);P20292(ALOX5AP);P07099(EPHX1);P08263(GSTA1);Q6UW02(CYP20A1);P00352(ALDH1A1);O94788(ALDH1A2);O75828(CBR3);Q8TC12(RDH11);P24557(TBXAS1);O60760(HPGD…	Q8N4T8(CBR4);Q9H2A2(ALDH8A1);P05108(CYP11A1);P09488(GSTM1);P30038(ALDH4A1);P08263(GSTA1);P00352(ALDH1A1);O94788(ALDH1A2);O60760(HPGDS);P30711(GSTT1);Q9BPW9(DHRS9);Q16678(CYP1B1);P46439(GSTM5);P17516(AKR1C4);P51649(ALDH5A1);O14684(PTGES);P00325(ADH1B);P28845(HSD11B1);O14880(MGST3);P21266(GSTM3);P05091(ALDH2);P14061(HSD17B1);Q7Z5P4(HSD17B13);P80365(HSD11B2);P11511(CYP19A1)
3-Succinoylpyridine	417.13	5.88713	C19569	2.2931	1.44676	1.73236e-05	map01100	Q8NCL4(GALNT6);Q96I99(SUCLG2);Q99943(AGPAT1);P23526(AHCY);P30613(PKLR);Q96N66(MBOAT7);P00167(CYB5A);Q9NSC7(ST6GALNAC1);Q15274(QPRT);P08574(CYC1);Q13884(SNTB1);P20936(RASA1);Q8N0U8(VKORC1L1);Q13057(COASY);Q8TB45(DEPTOR);P00558(PGK1);Q9P2T1(GMPR2);Q00722(PLCB2);P22392(NME2);Q9NZL9(MAT2B);P04075(ALDOA);Q13724(MOGS);Q9NQ88(TIGAR);Q96LJ7(DHRS1);P13995(MTHFD2);Q6UB35(MTHFD1L);Q14247(CTTN);Q01970(PLCB3)…	Q8NCL4(GALNT6);P30613(PKLR);Q9NSC7(ST6GALNAC1);P20936(RASA1);Q6UB35(MTHFD1L);P52209(PGD);Q7L5L3(GDPD3);P30043(BLVRB);Q9UBM7(DHCR7);Q53FA7(TP53I3);P32322(PYCR1);Q86YB7(ECHDC2);P08842(STS);Q9C0D9(SELENOI);Q96DC8(ECHDC3);O00763(ACACB);O60476(MAN1A2);P51178(PLCD1);Q9H7F0(ATP13A3);Q9NZC3(GDE1);P46439(GSTM5);Q9H788(SH2D4A);Q9H477(RBKS);P16435(POR);Q9UHK6(AMACR);Q02153(GUCY1B1);Q7Z5P4(HSD17B13);Q13011(E…
3-Succinoylpyridine	417.13	5.88713	C19569	2.2931	1.44676	1.73236e-05	map05204	Q53GQ0(HSD17B12);Q8N4T8(CBR4);Q8NBQ5(HSD17B11);P16152(CBR1);O75911(DHRS3);Q96SQ9(CYP2S1);P05108(CYP11A1);P09488(GSTM1);Q6IAN0(DHRS7B);Q9BPW9(DHRS9);P15121(AKR1B1);Q9Y2Q3(GSTK1);P30711(GSTT1);P09211(GSTP1);P20292(ALOX5AP);P08263(GSTA1);Q6UW02(CYP20A1);P24557(TBXAS1);O60760(HPGDS);Q9HBH5(RDH14);P50225(SULT1A1);O00338(SULT1C2);Q16678(CYP1B1);P28161(GSTM2);Q96LJ7(DHRS1);Q06136(KDSR);Q3SXM5(HSDL1);O75…	Q8N4T8(CBR4);P05108(CYP11A1);P09488(GSTM1);Q9BPW9(DHRS9);P30711(GSTT1);P08263(GSTA1);O60760(HPGDS);Q16678(CYP1B1);P46439(GSTM5);P17516(AKR1C4);O14684(PTGES);P28845(HSD11B1);O14880(MGST3);P21266(GSTM3);P14061(HSD17B1);Q7Z5P4(HSD17B13);P80365(HSD11B2);P11511(CYP19A1)
Morphine-6-glucuronide	442.148	3.77565	C16578	1.11043	1.22606	0.0188701	map00982	P21397(MAOA);Q9H2A2(ALDH8A1);P51648(ALDH3A2);P51649(ALDH5A1);P05108(CYP11A1);P09488(GSTM1);P47895(ALDH1A3);Q9Y2Q3(GSTK1);P30711(GSTT1);P09211(GSTP1);P20292(ALOX5AP);P08263(GSTA1);Q6UW02(CYP20A1);P00352(ALDH1A1);O94788(ALDH1A2);P30038(ALDH4A1);P24557(TBXAS1);O60760(HPGDS);P49189(ALDH9A1);P27338(MAOB);P30837(ALDH1B1);Q06278(AOX1);Q16678(CYP1B1);P28161(GSTM2);Q00796(SORD);O60341(KDM1A);Q02252(ALDH6A…	Q9H2A2(ALDH8A1);P51649(ALDH5A1);P05108(CYP11A1);P09488(GSTM1);P30711(GSTT1);P08263(GSTA1);P00352(ALDH1A1);O94788(ALDH1A2);P30038(ALDH4A1);O60760(HPGDS);P27338(MAOB);Q16678(CYP1B1);P46439(GSTM5);O14684(PTGES);P00325(ADH1B);O14880(MGST3);P21266(GSTM3);P05091(ALDH2);P11511(CYP19A1)
Morphine-6-glucuronide	442.148	3.77565	C16578	1.11043	1.22606	0.0188701	map04976	Q9Y2H1(STK38L);O75751(SLC22A3);P31749(AKT1);Q9NUT2(ABCB8);Q92673(SORL1);P33527(ABCC1);O75185(ATP2C2);Q03518(TAP1);Q03519(TAP2);P98194(ATP2C1);P08183(ABCB1);Q6P1M0(SLC27A4);P50225(SULT1A1);P63096(GNAI1);P28702(RXRB);Q96RR4(CAMKK2);P09471(GNAO1);Q14344(GNA13);P51812(RPS6KA3);Q16647(PTGIS);O15438(ABCC3);O14920(IKBKB);P61221(ABCE1);O75110(ATP9A);P04920(SLC4A2);O75116(ROCK2);O15530(PDPK1);Q53FZ2(ACSM3…	O75751(SLC22A3);P33527(ABCC1);O75185(ATP2C2);P08183(ABCB1);P28702(RXRB);Q03113(GNA12);P55064(AQP5);Q92959(SLCO2A1);O00168(FXYD1);Q9H7F0(ATP13A3);Q02153(GUCY1B1);O94911(ABCA8);O14975(SLC27A2);O95342(ABCB11);Q05513(PRKCZ);P02730(SLC4A1);P07451(CA3);P00915(CA1);P11169(SLC2A3);P11166(SLC2A1);Q96BD0(SLCO4A1);Q96CM8(ACSF2);Q9NSA0(SLC22A11);P05108(CYP11A1);P22760(AADAC);P11511(CYP19A1)
Romucosine D	404.128	5.84468	-	1.66714	1.30728	0.0107674
